# Supplementary material for: Photochemical synthesis of 1,2,4-triazolesviaaddition reaction of triplet intermediates to diazoalkanes and azomethine ylide intermediates
Source: Royal Society of Chemistry journal article supplement (doi:10.1039/d2sc04720a), 2022-01-01

## *Supporting Information for*

### **Photochemical synthesis of 1,2,4-triazoles via addition reaction of triplet intermediates to diazoalkanes and azomethine ylide intermediates**

Bao-Gui Cai,<sup>†1</sup> Ye-Peng Bao,<sup>†1</sup> Chao Pei,<sup>2</sup> Qian Li, Lei Li,<sup>1</sup> Rene M. Koenigs\*<sup>2</sup> and Jun Xuan\*<sup>1,3</sup>

<sup>1</sup> Anhui Province Key Laboratory of Chemistry for Inorganic/Organic Hybrid Functionalized Materials, College of Chemistry & Chemical Engineering, Anhui University, Hefei, Anhui 230601, People's Republic of China

<sup>2</sup> Institute of Organic Chemistry, RWTH Aachen University, Landoltweg 1, 52074 Aachen (Germany)

<sup>3</sup> Key Laboratory of Structure and Functional Regulation of Hybrid Materials (Anhui University), Ministry of Education, Hefei, 230601, People's Republic of China

<sup>†</sup> These authors contributed equally.

#### **Table of contents**

|                                                                      |     |
|----------------------------------------------------------------------|-----|
| 1. General.....                                                      | S2  |
| 2. Scope of starting materials.....                                  | S3  |
| 3. The condition optimization.....                                   | S4  |
| 4. General procedure and spectral data of products.....              | S5  |
| 5. Follow-up chemistry.....                                          | S18 |
| 6. TEMPO trapping experiment.....                                    | S20 |
| 7. Crystal data of <b>13n</b> .....                                  | S21 |
| 8. Copies of <sup>1</sup> H NMR and <sup>13</sup> C NMR spectra..... | S22 |

## 1. General

All reactions involving air- or moisture-sensitive reagents or intermediates were carried out in pre-heated glassware under an argon atmosphere using standard Schlenk techniques. THF was freshly distilled from Na under argon. All other solvents and reagents were purified according to standard procedures or were used as received from chemical suppliers. The starting materials were synthesized according to literature procedures. The light employed in this work was bought from GeAo Chemical: model H106062, 24 W blue LEDs. All reactions involving heating are carried out in an oil bath.

**Chromatography:** Analytical thin layer chromatography was performed using Qingdao Puke Parting Materials Co. silica gel plates (Silica gel 60 F254). Visualisation was by ultraviolet fluorescence ( $\lambda = 254$  nm) and/or staining with phosphomolybdic acid or potassium permanganate ( $\text{KMnO}_4$ ). Flash column chromatography was performed using 200-300 mesh silica gel.

**$^1\text{H}$  NMR** and  **$^{13}\text{C}$  NMR** spectra were recorded on a JEOL JNM ECZ000R at 300 K. Spectra were calibrated relative to solvent's residual proton and carbon chemical shift:  $\text{CHCl}_3$  ( $\delta = 7.26$  for  $^1\text{H}$  NMR and  $\delta = 77.0$  for  $^{13}\text{C}$  NMR). Data are reported as follows: chemical shift  $\delta/\text{ppm}$ , integration ( $^1\text{H}$  only), multiplicity (s = singlet, d = doublet, t = triplet, q = quartet, dd = doublet of doublets, m = multiplet or combinations thereof;  $^{13}\text{C}$  signals are singlets unless otherwise stated), coupling constants  $J$  in Hz, assignment.

**High Resolution Mass Spectrometry (HRMS):** All were recorded on LTQ Orbitrap XL using a positive electrospray ionization ( $\text{ESI}^+$ ). Measured values are reported to 4 decimal places of the calculated value. The calculated values are based on the most abundant isotope.

**X-ray diffraction** measurements were performed on a CCD area detector using graphite monochromated  $\text{MoK}\alpha$  radiation ( $\lambda = 0.71069$  Å) at 298(2) K.

## 2. Scope of starting materials

### Scope of diazo compound

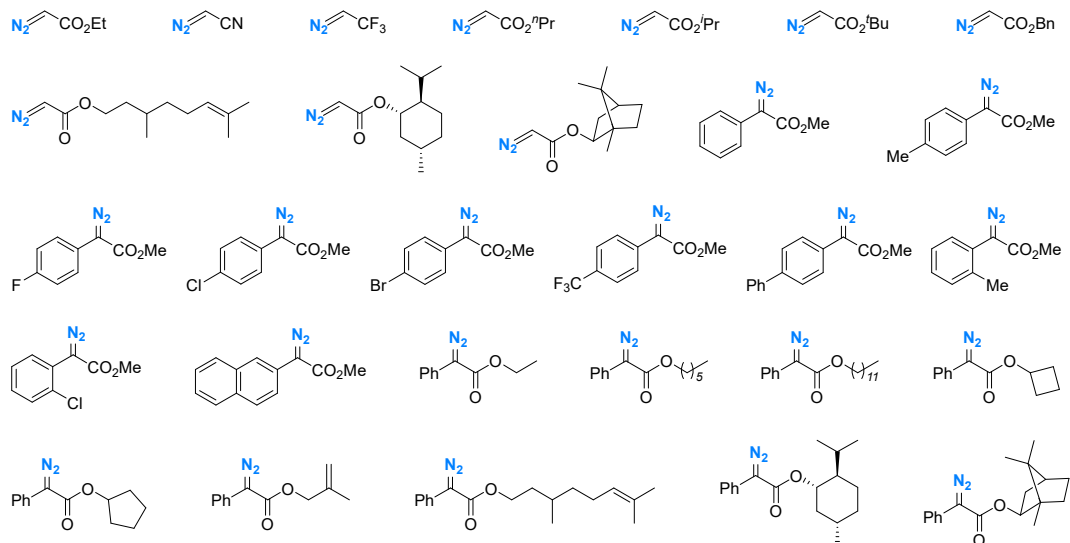

### Scope of nitrile compound

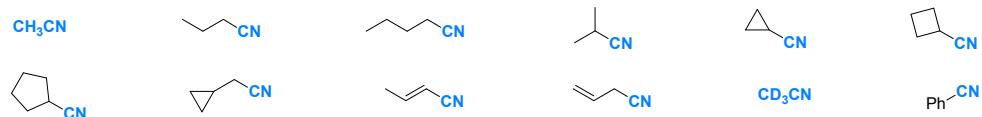

### Scope of azo compound

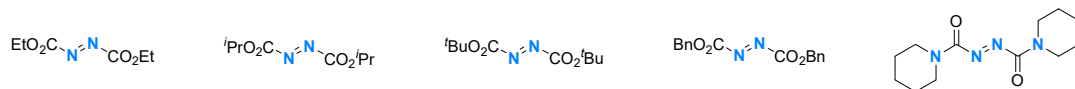

### Unsuccessful examples

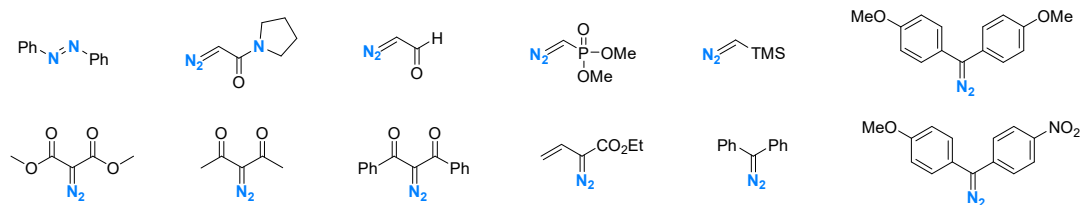

### 3. The condition optimization <sup>[a]</sup>

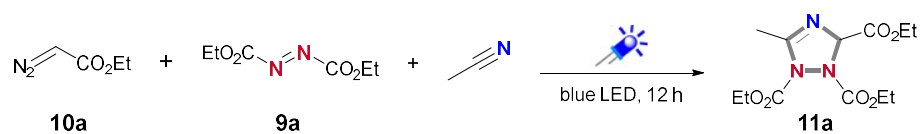

| Entry            | Ratio of <b>10a:9a</b> | Yield of <b>11a</b> (%) <sup>[b]</sup> |
|------------------|------------------------|----------------------------------------|
| 1                | 0.4 mmol : 0.1 mmol    | 86%                                    |
| 2                | 0.3 mmol : 0.1 mmol    | 74%                                    |
| 3                | 0.2 mmol : 0.1 mmol    | 69%                                    |
| 4                | 0.1 mmol : 0.1 mmol    | 36%                                    |
| 5                | 0.1 mmol : 0.2 mmol    | 21%                                    |
| 6                | 0.1 mmol : 0.3 mmol    | 19%                                    |
| 7 <sup>[c]</sup> | 0.4 mmol : 0.1 mmol    | Not detected                           |

<sup>[a]</sup> Reaction conditions: **10a** and **9a** dissolved in degassed CH<sub>3</sub>CN (1 mL) under 24 W Blue LEDs for 12 h. <sup>[b]</sup> Yield of the isolated product. <sup>[c]</sup> under dark.

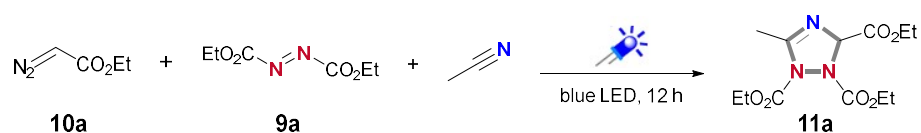

| Entry | Solvent             | Yield of <b>11a</b> (%) <sup>[b]</sup> |
|-------|---------------------|----------------------------------------|
| 1     | DCM : MeCN = 1:1    | 41                                     |
| 2     | DCM : MeCN = 2:1    | 36                                     |
| 3     | DCM + 0.5 mmol MeCN | Trace                                  |
| 4     | DCM + 1 mmol MeCN   | Trace                                  |

<sup>[a]</sup> Reaction conditions: 0.4 mmol **10a** and 0.1 mmol **9a** dissolved in degassed solvent (1 mL) under 24 W Blue LEDs for 12 h. <sup>[b]</sup> Yield of the isolated product.

#### 4. General procedure and spectral data of products

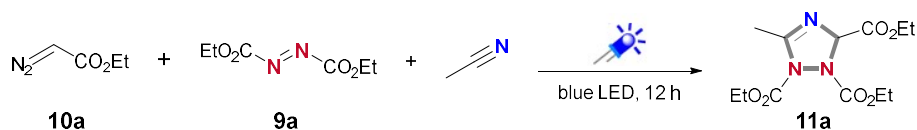

**General procedure (GPI):** To a 10 mL Schlenk flask equipped with a magnetic stir bar was added ethyl diazoacetate (0.40 mmol), diethylazodiformiat (0.10 mmol), dry MeCN (1.0 mL). The resulting mixture was stirred at a distance of ~3 cm from a 24 W blue LED at room temperature for 12 h. The solvent was removed by vacuum and the crude product was purified by flash chromatography on silica gel silica: 200~300; eluant: petroleum ether/ethyl acetate (5:1~1:1) to provide pure product **11a** as a colorless oil in 86% yield (25.9 mg).

**1.0 mmol procedure:** To a 25 mL Schlenk flask equipped with a magnetic stir bar was added ethyl diazoacetate (4.0 mmol), diethylazodiformiat (1.0 mmol), dry MeCN (10 mL). The resulting mixture was stirred at a distance of ~3 cm from a 24 W blue LED at room temperature for 24 h. The solvent was removed by vacuum and the crude product was purified by flash chromatography on silica gel silica: 200~300; eluant: petroleum ether/ethyl acetate (5:1~1:1) to provide pure product **11a** as a colorless oil in 84% yield.

#### 1,2-Diethyl 3-propyl 5-methyl-1H-1,2,4-triazole-1,2,3(3H)-tricarboxylate (**11a**)

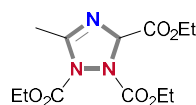

According to *GPI* with diazo compound (45.6 mg, 0.40 mmol, 4.0 equiv.) and diethylazodiformiat (17.4 mg, 0.10 mmol, 1.0 equiv.) in 1.0 mL MeCN for 12 h. Purification by silica gel chromatography afforded the desired product and as a colorless oil in 86% yield (25.9 mg). **<sup>1</sup>H NMR** (400 MHz, CDCl<sub>3</sub>, 300 K): δ (ppm) = 5.98 (s, 1H), 4.38 – 4.19 (m, 6H), 2.49 (s, 3H), 1.36 – 1.28 (m, 9H). **<sup>13</sup>C NMR** (100 MHz, CDCl<sub>3</sub>, 300 K): δ (ppm) = 166.7, 158.6, 156.9, 151.6, 82.4, 63.7, 63.5, 62.1, 17.1, 14.3, 14.2, 13.9. **HRMS** (ESI) *m/z*: [M+H]<sup>+</sup> Calculated for C<sub>12</sub>H<sub>20</sub>N<sub>3</sub>O<sub>6</sub>: 302.1347; Found: 302.1345.

#### Diethyl 3-cyano-5-methyl-1H-1,2,4-triazole-1,2(3H)-dicarboxylate (**11b**)

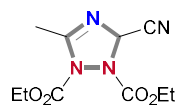

According to *GPI* with diazo compound (26.8 mg, 0.40 mmol, 4.0 equiv.) and diethylazodiformiat (17.4 mg, 0.10 mmol, 1.0 equiv.) in 1.0 mL MeCN for 12 h. Purification by silica gel chromatography afforded the desired product and as a colorless oil in 85% yield (21.6 mg). **<sup>1</sup>H NMR** (400 MHz, CDCl<sub>3</sub>, 300 K): δ (ppm) = 6.30 (d, *J* = 1.3 Hz, 1H), 4.42 – 4.24 (m, 4H), 2.51 (d, *J* = 1.2 Hz, 3H), 1.38 – 1.32 (m, 6H). **<sup>13</sup>C NMR** (100 MHz, CDCl<sub>3</sub>, 300 K): δ (ppm) = 160.5, 155.9, 150.5, 114.1, 72.2, 64.5, 64.1, 16.9, 14.2, 14.1. **HRMS** (ESI) *m/z*: [M+H]<sup>+</sup> Calculated for C<sub>10</sub>H<sub>15</sub>N<sub>4</sub>O<sub>4</sub>: 255.1088; Found: 255.1091.

#### Dibenzyl 5-methyl-3-(trifluoromethyl)-1H-1,2,4-triazole-1,2(3H)-dicarboxylate (**11c**)

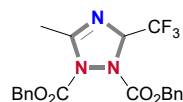

According to *GPI* with diazo compound (44.0 mg, 0.40 mmol, 4.0 equiv.) and diethylazodiformiat (17.4 mg, 0.10 mmol, 1.0 equiv.) in 1.0 mL MeCN for 12 h. Purification by silica gel chromatography afforded the desired product and as a colorless oil in 24% yield (10.2 mg). **<sup>1</sup>H NMR** (400 MHz, CDCl<sub>3</sub>, 300 K): δ (ppm) = 7.37 – 7.26 (m, 10H), 5.95 – 5.87 (m, 1H), 5.27 – 5.18 (m, 4H), 2.49 (d, *J* = 1.2 Hz, 3H). **<sup>13</sup>C NMR** (150 MHz,

CDCl<sub>3</sub>, 300 K):  $\delta$  (ppm) = 161.0, 156.4, 151.1, 134.6, 134.6, 128.7, 128.7, 128.7, 128.6, 128.1, 127.9, 81.2 (q,  $J$  = 100.6 Hz), 69.5, 69.2, 17.1. **HRMS** (ESI)  $m/z$ :  $[M+H]^+$  Calculated for C<sub>20</sub>H<sub>19</sub>F<sub>3</sub>N<sub>3</sub>O<sub>4</sub>: 422.1322; Found: 422.1315.

### 1,2-Diethyl 3-propyl 5-methyl-1*H*-1,2,4-triazole-1,2,3(3*H*)-tricarboxylate (11d)

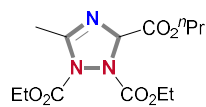

According to *GPI* with diazo compound (51.2 mg, 0.40 mmol, 4.0 equiv.) and diethylazodiformiat (17.4 mg, 0.10 mmol, 1.0 equiv.) in 1.0 mL MeCN for 12 h. Purification by silica gel chromatography afforded the desired product and as a colorless oil in 84% yield (26.5 mg). **<sup>1</sup>H NMR** (400 MHz, CDCl<sub>3</sub>, 300 K):  $\delta$  (ppm) = 5.99 (d,  $J$  = 1.6 Hz, 1H), 4.39 – 4.21 (m, 4H), 4.17 – 4.09 (m, 2H), 2.49 (s, 3H), 1.72 – 1.65 (m, 2H), 1.37 – 1.29 (m, 6H), 0.94 (t,  $J$  = 7.4 Hz, 3H). **<sup>13</sup>C NMR** (100 MHz, CDCl<sub>3</sub>, 300 K):  $\delta$  (ppm) = 166.7, 158.6, 156.8, 151.6, 82.4, 67.5, 63.6, 63.5, 21.7, 17.1, 14.3, 14.2, 10.1. **HRMS** (ESI)  $m/z$ :  $[M+H]^+$  Calculated for C<sub>13</sub>H<sub>22</sub>N<sub>3</sub>O<sub>6</sub>: 316.1503; Found: 316.1501.

### 1,2-Diethyl 3-isopropyl 5-methyl-1*H*-1,2,4-triazole-1,2,3(3*H*)-tricarboxylate (11e)

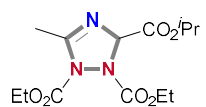

According to *GPI* with diazo compound (51.2 mg, 0.40 mmol, 4.0 equiv.) and diethylazodiformiat (17.4 mg, 0.10 mmol, 1.0 equiv.) in 1.0 mL MeCN for 12 h. Purification by silica gel chromatography afforded the desired product and as a colorless oil in 76% yield (24.0 mg). **<sup>1</sup>H NMR** (400 MHz, CDCl<sub>3</sub>, 300 K):  $\delta$  (ppm) = 5.94 (s, 1H), 5.08 – 4.98 (m, 1H), 4.39 – 4.19 (m, 4H), 2.49 (s, 3H), 1.36 – 1.30 (m, 6H), 1.29 – 1.24 (m, 6H). **<sup>13</sup>C NMR** (100 MHz, CDCl<sub>3</sub>, 300 K):  $\delta$  (ppm) = 166.2, 158.6, 156.8, 151.7, 82.6, 70.0, 63.6, 63.5, 21.6, 21.5, 17.1, 14.3, 14.2. **HRMS** (ESI)  $m/z$ :  $[M+H]^+$  Calculated for C<sub>13</sub>H<sub>22</sub>N<sub>3</sub>O<sub>6</sub>: 316.1503; Found: 316.1501.

### 3-Tert-butyl 1,2-diethyl 5-methyl-1*H*-1,2,4-triazole-1,2,3(3*H*)-tricarboxylate (11f)

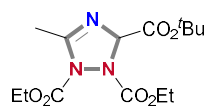

According to *GPI* with diazo compound (56.8 mg, 0.40 mmol, 4.0 equiv.) and diethylazodiformiat (17.4 mg, 0.10 mmol, 1.0 equiv.) in 1.0 mL MeCN for 12 h. Purification by silica gel chromatography afforded the desired product and as a colorless oil in 58% yield (19.1 mg). **<sup>1</sup>H NMR** (400 MHz, CDCl<sub>3</sub>, 300 K):  $\delta$  (ppm) = 5.86 (s, 1H), 4.39 – 4.19 (m, 4H), 2.48 (d,  $J$  = 1.3 Hz, 3H), 1.46 (s, 9H), 1.37 – 1.29 (m, 6H). **<sup>13</sup>C NMR** (100 MHz, CDCl<sub>3</sub>, 300 K):  $\delta$  (ppm) = 165.6, 158.4, 156.9, 151.8, 83.2, 83.0, 63.5, 63.4, 27.8, 17.1, 14.3, 14.2. **HRMS** (ESI)  $m/z$ :  $[M+H]^+$  Calculated for C<sub>14</sub>H<sub>24</sub>N<sub>3</sub>O<sub>6</sub>: 330.1660; Found: 330.1664.

### 3-Benzyl 1,2-diethyl 5-methyl-1*H*-1,2,4-triazole-1,2,3(3*H*)-tricarboxylate (11g)

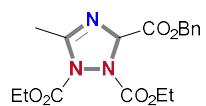

According to *GPI* with diazo compound (70.4 mg, 0.40 mmol, 4.0 equiv.) and diethylazodiformiat (17.4 mg, 0.10 mmol, 1.0 equiv.) in 1.0 mL MeCN for 12 h. Purification by silica gel chromatography afforded the desired product and as a colorless oil in 63% yield (22.9 mg). **<sup>1</sup>H NMR** (400 MHz, CDCl<sub>3</sub>, 300 K):  $\delta$  (ppm) = 7.37 – 7.32 (m, 5H), 6.04 (s, 1H), 5.23 – 5.15 (m, 2H), 4.35 – 4.14 (m, 4H), 2.48 (s, 3H), 1.33 – 1.24 (m, 6H). **<sup>13</sup>C NMR** (100 MHz, CDCl<sub>3</sub>, 300 K):  $\delta$  (ppm) = 166.5, 158.8, 156.8, 151.5, 134.9, 128.6, 128.5, 128.2, 82.4, 67.6, 63.7, 63.5, 17.1, 14.3, 14.1. **HRMS** (ESI)  $m/z$ :  $[M+H]^+$  Calculated for C<sub>17</sub>H<sub>22</sub>N<sub>3</sub>O<sub>6</sub>: 364.1503; Found: 364.1503.

**1,2-Diethyl 3-((1R,2R,5S)-2-isopropyl-5-methylcyclohexyl) (R)-5-methyl-1H-1,2,4-triazole-1,2,3(3H)-tricarboxylate (11h)**

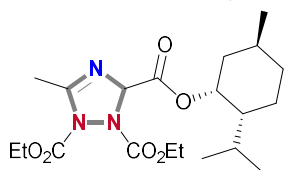

According to *GPI* with diazo compound (89.7 mg, 0.40 mmol, 4.0 equiv.) and diethyl azodicarboxylate (17.4 mg, 0.10 mmol, 1.0 equiv.) in 1.0 mL acetonitrile for 12 h. Purification by silica gel chromatography afforded the desired product and as a colorless oil in 75% yield (32.5 mg).  $^1\text{H NMR}$  (400 MHz,  $\text{CDCl}_3$ , 300 K):  $\delta$  (ppm) = 5.88 (s, 1H), 4.68 – 4.58 (m, 1H), 4.31 – 4.13 (m, 4H), 2.41 (s, 3H), 1.98 – 1.90 (m, 1H), 1.84 – 1.72 (m, 1H), 1.63 – 1.58 (m, 2H), 1.45 – 1.18 (m, 9H), 1.03 – 0.88 (m, 2H), 0.84 – 0.80 (m, 6H), 0.70 – 0.65 (m, 3H).  $^{13}\text{C NMR}$  (100 MHz,  $\text{CDCl}_3$ , 300 K):  $\delta$  (ppm) = 166.1, 158.8, 156.7, 151.7, 82.6, 76.2, 63.6, 63.5, 47.0, 40.4, 34.1, 31.3, 26.2, 23.5, 21.9, 20.6, 17.1, 16.4, 14.3. **HRMS** (ESI)  $m/z$ :  $[\text{M}+\text{Na}]^+$  Calculated for  $\text{C}_{20}\text{H}_{33}\text{N}_3\text{NaO}_6$ : 434.2262; Found: 434.2264.

**3-(3,7-Dimethyloct-6-en-1-yl) 1,2-diethyl (3R)-5-methyl-1H-1,2,4-triazole-1,2,3(3H)-tricarboxylate (11i)**

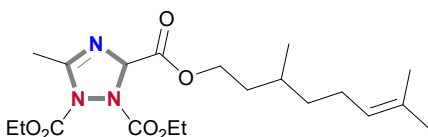

According to *GPI* with diazo compound (89.7 mg, 0.40 mmol, 4.0 equiv.) and diethyl azodicarboxylate (17.4 mg, 0.10 mmol, 1.0 equiv.) in 1.0 mL acetonitrile for 12 h. Purification by silica gel chromatography afforded the desired product and as a colorless oil in 67% yield (29.1 mg).  $^1\text{H NMR}$  (400 MHz,  $\text{CDCl}_3$ , 300 K):  $\delta$  (ppm) = 5.91 (d,  $J$  = 1.3 Hz, 1H), 5.05 – 4.96 (m, 1H), 4.31 – 4.07 (m, 6H), 2.42 (d,  $J$  = 1.3 Hz, 3H), 1.97 – 1.80 (m, 2H), 1.61 (s, 4H), 1.53 (s, 3H), 1.49 – 1.37 (m, 2H), 1.29 – 1.23 (m, 6H), 1.19 – 1.05 (m, 2H), 0.83 (d,  $J$  = 6.7 Hz, 3H).  $^{13}\text{C NMR}$  (100 MHz,  $\text{CDCl}_3$ , 300 K):  $\delta$  (ppm) = 166.7, 158.6, 156.8, 151.6, 131.4, 124.4, 82.4, 64.7, 63.7, 63.5, 36.9, 36.9, 35.1, 29.5, 29.4, 25.7, 25.3, 19.3, 19.3, 17.6, 17.1, 14.3, 14.2. **HRMS** (ESI)  $m/z$ :  $[\text{M}+\text{Na}]^+$  Calculated for  $\text{C}_{20}\text{H}_{33}\text{N}_3\text{NaO}_6$ : 434.2262; Found: 434.2275.

**1,2-Diethyl 3-((1R,2S,4S)-1,7,7-trimethylbicyclo[2.2.1]heptan-2-yl) (R)-5-methyl-1H-1,2,4-triazole-1,2,3(3H)-tricarboxylate (11j)**

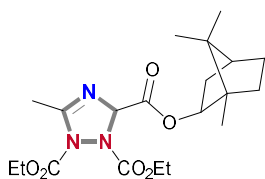

According to *GPI* with diazo compound (88.9 mg, 0.40 mmol, 4.0 equiv.) and diethyl azodicarboxylate (17.4 mg, 0.10 mmol, 1.0 equiv.) in 1.0 mL acetonitrile for 12 h. Purification by silica gel chromatography afforded the desired product and as a colorless oil in 81% yield (d.r. = 1:1, 34.9 mg).  $^1\text{H NMR}$  (400 MHz,  $\text{CDCl}_3$ , 300 K):  $\delta$  (ppm) = 5.91 (d,  $J$  = 1.4 Hz, 1H), 4.92 – 4.82 (m, 1H), 4.30 – 4.13 (m, 4H), 2.43 (d,  $J$  = 1.3 Hz, 3H), 2.32 – 2.22 (m, 1H), 1.84 – 1.74 (m, 1H), 1.72 – 1.60 (m, 2H), 1.28 – 1.23 (m, 6H), 1.21 – 1.08 (m, 3H), 0.81 (d,  $J$  = 8.6 Hz, 6H), 0.75 (d,  $J$  = 7.0 Hz, 3H).  $^{13}\text{C NMR}$  (100 MHz,  $\text{CDCl}_3$ , 300 K):  $\delta$  (ppm) = 166.7, 158.6, 158.5, 156.8, 151.5, 82.7, 82.6, 81.8, 81.6, 63.6, 63.5, 49.1, 48.9, 48.0, 47.9, 44.8, 44.8, 36.5, 36.2, 27.9, 27.9, 26.9, 19.6, 18.8, 17.1, 17.1, 14.3, 14.2, 13.3. **HRMS** (ESI)  $m/z$ :  $[\text{M}+\text{Na}]^+$  Calculated for  $\text{C}_{20}\text{H}_{31}\text{N}_3\text{NaO}_6$ : 432.2105; Found: 432.2112.

**Triethyl 5-propyl-1H-1,2,4-triazole-1,2,3(3H)-tricarboxylate (11k)**

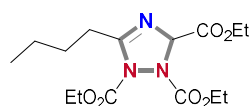

According to *GPI* with diazo compound (45.6 mg, 0.40 mmol, 4.0 equiv.) and diethylazodiformiat (17.4 mg, 0.10 mmol, 1.0 equiv.) in 1.0 mL valeronitrile for 12 h. Purification by silica gel chromatography afforded the desired product and as a colorless oil in 61% yield (20.9 mg). **<sup>1</sup>H NMR** (400 MHz, CDCl<sub>3</sub>, 300 K): δ (ppm) = 5.99 (s, 1H), 4.37 – 4.18 (m, 6H), 2.86 (t, *J* = 7.1 Hz, 2H), 1.75 – 1.65 (m, 2H), 1.42 – 1.27 (m, 11H), 0.93 (t, *J* = 7.3 Hz, 3H). **<sup>13</sup>C NMR** (100 MHz, CDCl<sub>3</sub>, 300 K): δ (ppm) = 166.7, 162.3, 156.9, 151.7, 82.3, 63.6, 63.4, 62.0, 30.0, 28.2, 22.2, 14.3, 14.2, 13.9, 13.7. **HRMS** (ESI) *m/z*: [M+H]<sup>+</sup> Calculated for C<sub>15</sub>H<sub>26</sub>N<sub>3</sub>O<sub>6</sub>: 344.1816; Found: 344.1833.

#### Triethyl 5-isopropyl-1H-1,2,4-triazole-1,2,3(3H)-tricarboxylate (11i)

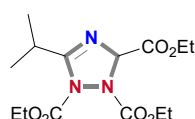

According to *GPI* with diazo compound (45.6 mg, 0.40 mmol, 4.0 equiv.) and diethylazodiformiat (17.4 mg, 0.10 mmol, 1.0 equiv.) in 1.0 mL isobutyronitrile for 12 h. Purification by silica gel chromatography afforded the desired product and as a colorless oil in 55% yield (18.1 mg). **<sup>1</sup>H NMR** (400 MHz, CDCl<sub>3</sub>, 300 K): δ (ppm) = 5.98 (s, 1H), 4.36 – 4.18 (m, 6H), 3.50 – 3.41 (m, 1H), 1.35 – 1.26 (m, 15H). **<sup>13</sup>C NMR** (100 MHz, CDCl<sub>3</sub>, 300 K): δ (ppm) = 167.0, 166.7, 157.0, 151.7, 82.3, 63.5, 63.4, 62.0, 29.3, 20.8, 19.2, 14.3, 14.2, 13.9. **HRMS** (ESI) *m/z*: [M+H]<sup>+</sup> Calculated for C<sub>14</sub>H<sub>24</sub>N<sub>3</sub>O<sub>6</sub>: 330.1660; Found: 330.1673.

#### Triethyl 5-cyclopropyl-1H-1,2,4-triazole-1,2,3(3H)-tricarboxylate (11m)

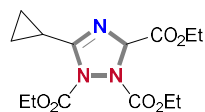

According to *GPI* with diazo compound (45.6 mg, 0.40 mmol, 4.0 equiv.) and diethylazodiformiat (17.4 mg, 0.10 mmol, 1.0 equiv.) in 1.0 mL cyclopropanecarbonitrile for 12 h. Purification by silica gel chromatography afforded the desired product and as a colorless oil in 71% yield (23.3 mg). **<sup>1</sup>H NMR** (400 MHz, CDCl<sub>3</sub>, 300 K): δ (ppm) = 5.94 (s, 1H), 4.40 – 4.18 (m, 6H), 2.42 – 2.34 (m, 1H), 1.37 – 1.24 (m, 11H), 1.18 – 0.97 (m, 3H). **<sup>13</sup>C NMR** (100 MHz, CDCl<sub>3</sub>, 300 K): δ (ppm) = 166.7, 164.6, 156.7, 152.1, 81.9, 63.5, 63.4, 61.9, 14.3, 14.2, 13.9, 11.6, 10.2, 9.7. **HRMS** (ESI) *m/z*: [M+H]<sup>+</sup> Calculated for C<sub>14</sub>H<sub>22</sub>N<sub>3</sub>O<sub>6</sub>: 328.1503; Found: 328.1521.

#### Triethyl 5-cyclobutyl-1H-1,2,4-triazole-1,2,3(3H)-tricarboxylate (11n)

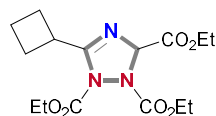

According to *GPI* with diazo compound (45.6 mg, 0.40 mmol, 4.0 equiv.) and diethylazodiformiat (17.4 mg, 0.10 mmol, 1.0 equiv.) in 1.0 mL cyclobutanecarbonitrile for 12 h. Purification by silica gel chromatography afforded the desired product and as a colorless oil in 52% yield (17.8 mg). **<sup>1</sup>H NMR** (400 MHz, CDCl<sub>3</sub>, 300 K): δ (ppm) = 6.03 (d, *J* = 1.1 Hz, 1H), 4.36 – 4.18 (m, 6H), 3.86 – 3.76 (m, 1H), 2.44 – 2.27 (m, 4H), 2.07 – 1.85 (m, 2H), 1.35 – 1.27 (m, 9H). **<sup>13</sup>C NMR** (100 MHz, CDCl<sub>3</sub>, 300 K): δ (ppm) = 166.7, 164.7, 156.9, 151.4, 82.5, 63.6, 63.4, 62.0, 34.5, 26.8, 26.6, 18.1, 14.3, 14.2, 13.9. **HRMS** (ESI) *m/z*: [M+H]<sup>+</sup> Calculated for C<sub>15</sub>H<sub>24</sub>N<sub>3</sub>O<sub>6</sub>: 342.1660; Found: 342.1671.

#### Triethyl 5-cyclopentyl-1H-1,2,4-triazole-1,2,3(3H)-tricarboxylate (11o)

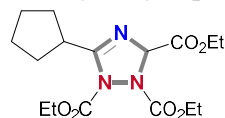

According to *GPI* with diazo compound (45.6 mg, 0.40 mmol, 4.0 equiv.) and diethylazodiformiat (17.4 mg, 0.10 mmol, 1.0 equiv.) in 1.0 mL cyclopentanecarbonitrile for 12 h. Purification by silica gel chromatography afforded the desired product and as a colorless oil in 47% yield (16.7 mg). **<sup>1</sup>H NMR** (400 MHz,



CDCl<sub>3</sub>, 300 K):  $\delta$  (ppm) = 5.98 (d,  $J$  = 0.9 Hz, 1H), 4.37 – 4.17 (m, 6H), 3.59 – 3.48 (m, 1H), 2.17 – 1.88 (m, 3H), 1.77 – 1.60 (m, 5H), 1.35 – 1.26 (m, 9H). <sup>13</sup>C NMR (100 MHz, CDCl<sub>3</sub>, 300 K):  $\delta$  (ppm) = 166.7, 165.9, 157.0, 151.6, 82.3, 63.5, 63.3, 62.0, 39.5, 31.7, 30.3, 25.5, 25.5, 14.3, 14.3, 13.9. HRMS (ESI)  $m/z$ : [M+H]<sup>+</sup> Calculated for C<sub>16</sub>H<sub>26</sub>N<sub>3</sub>O<sub>6</sub>: 356.1816; Found: 356.1828.

#### Triethyl 5-(cyclopropylmethyl)-1*H*-1,2,4-triazole-1,2,3(3*H*)-tricarboxylate (11p)

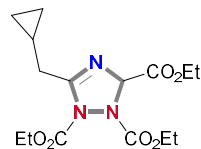

According to *GPI* with diazo compound (45.6 mg, 0.40 mmol, 4.0 equiv.) and diethylazodiformiat (17.4 mg, 0.10 mmol, 1.0 equiv.) in 1.0 mL 2-cyclopropylacetonitrile for 12 h. Purification by silica gel chromatography afforded the desired product and as a colorless oil in 47% yield (16.1 mg). <sup>1</sup>H NMR (400 MHz, CDCl<sub>3</sub>, 300 K):  $\delta$  (ppm) = 6.02 (d,  $J$  = 1.1 Hz, 1H), 4.38 – 4.19 (m, 6H), 2.93 – 2.83 (m, 1H), 2.75 – 2.65 (m, 1H), 1.35 – 1.27 (m, 9H), 1.22 – 1.11 (m, 1H), 0.62 – 0.51 (m, 2H), 0.29 – 0.17 (m, 2H). <sup>13</sup>C NMR (100 MHz, CDCl<sub>3</sub>, 300 K):  $\delta$  (ppm) = 166.7, 161.8, 156.9, 151.7, 82.4, 63.6, 63.5, 62.0, 35.1, 14.3, 14.2, 13.9, 7.8, 4.5, 4.4. HRMS (ESI)  $m/z$ : [M+H]<sup>+</sup> Calculated for C<sub>15</sub>H<sub>24</sub>N<sub>3</sub>O<sub>6</sub>: 342.1660; Found: 342.1671.

#### (*E*)-Triethyl 5-(prop-1-en-1-yl)-1*H*-1,2,4-triazole-1,2,3(3*H*)-tricarboxylate (11q)

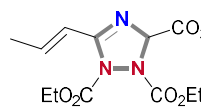

According to *GPI* with diazo compound (45.6 mg, 0.40 mmol, 4.0 equiv.) and diethylazodiformiat (17.4 mg, 0.10 mmol, 1.0 equiv.) in 1.0 mL (*E*)-2-butenenitrile for 12 h. Purification by silica gel chromatography afforded the desired product and as a colorless oil in 64% yield (20.9 mg). <sup>1</sup>H NMR (400 MHz, CDCl<sub>3</sub>, 300 K):  $\delta$  (ppm) = 7.03 – 6.92 (m, 1H), 6.60 – 6.52 (m, 1H), 6.05 (s, 1H), 4.38 – 4.17 (m, 6H), 1.97 – 1.91 (m, 3H), 1.35 – 1.26 (m, 9H). <sup>13</sup>C NMR (100 MHz, CDCl<sub>3</sub>, 300 K):  $\delta$  (ppm) = 166.7, 157.5, 156.8, 152.5, 142.0, 119.1, 82.1, 63.6, 63.5, 62.0, 18.7, 14.3, 14.2, 13.9. HRMS (ESI)  $m/z$ : [M+H]<sup>+</sup> Calculated for C<sub>14</sub>H<sub>22</sub>N<sub>3</sub>O<sub>6</sub>: 328.1503; Found: 328.1517.

#### Triethyl 5-allyl-1*H*-1,2,4-triazole-1,2,3(3*H*)-tricarboxylate (11r)

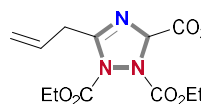

According to *GPI* with diazo compound (45.6 mg, 0.40 mmol, 4.0 equiv.) and diethylazodiformiat (17.4 mg, 0.10 mmol, 1.0 equiv.) in 1.0 mL but-3-enenitrile for 12 h. Purification by silica gel chromatography afforded the desired product and as a colorless oil in 59% yield (19.3 mg). <sup>1</sup>H NMR (400 MHz, CDCl<sub>3</sub>, 300 K):  $\delta$  (ppm) = 6.07 – 5.92 (m, 2H), 5.29 – 5.16 (m, 2H), 4.39 – 4.18 (m, 6H), 3.71 – 3.57 (m, 2H), 1.36 – 1.27 (m, 9H). <sup>13</sup>C NMR (100 MHz, CDCl<sub>3</sub>, 300 K):  $\delta$  (ppm) = 166.6, 160.4, 156.8, 151.5, 130.6, 118.6, 82.4, 63.7, 63.6, 62.1, 34.6, 14.3, 14.2, 13.9. HRMS (ESI)  $m/z$ : [M+H]<sup>+</sup> Calculated for C<sub>14</sub>H<sub>22</sub>N<sub>3</sub>O<sub>6</sub>: 328.1503; Found: 328.1515.

#### Triethyl 5-phenyl-1*H*-1,2,4-triazole-1,2,3(3*H*)-tricarboxylate (11s)

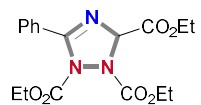

According to *GPI* with diazo compound (45.6 mg, 0.40 mmol, 4.0 equiv.) and diethylazodiformiat (17.4 mg, 0.10 mmol, 1.0 equiv.) in 1.0 mL benzonitrile for 12 h. Purification by silica gel chromatography afforded the desired product and as a colorless oil in 51% yield (18.6 mg). <sup>1</sup>H NMR (400 MHz, CDCl<sub>3</sub>, 300 K):  $\delta$  (ppm) = 7.90 – 7.84 (m, 2H), 7.56 – 7.50 (m, 1H), 7.46 – 7.40 (m, 2H), 6.23 (s, 1H), 4.39 – 4.17 (m, 6H), 1.38 – 1.28 (m, 6H), 1.16 (t,  $J$  = 7.1 Hz, 3H). <sup>13</sup>C NMR (100 MHz, CDCl<sub>3</sub>, 300 K):  $\delta$  (ppm) = 166.5, 161.2, 156.8, 153.2, 132.2, 129.9, 128.8, 128.1, 82.5, 63.7, 62.3, 14.5, 14.0. HRMS (ESI)  $m/z$ : [M+H]<sup>+</sup> Calculated for C<sub>17</sub>H<sub>22</sub>N<sub>3</sub>O<sub>6</sub>: 364.1503; Found: 364.1521.

### Triethyl 5-D<sub>3</sub>-methyl-1*H*-1,2,4-triazole-1,2,3(3*H*)-tricarboxylate (11t)

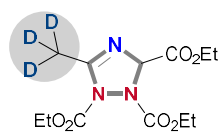

According to *GPI* with diazo compound (45.6 mg, 0.40 mmol, 4.0 equiv.) and diethylazodicarboxylate (17.4 mg, 0.10 mmol, 1.0 equiv.) in 1.0 mL acetonitrile-D<sub>3</sub> for 12 h. Purification by silica gel chromatography afforded the desired product and as a colorless oil in 61% yield (18.6 mg). <sup>1</sup>H NMR (400 MHz, CDCl<sub>3</sub>, 300 K): δ (ppm) = 5.98 (s, 1H), 4.38 – 4.19 (m, 6H), 1.36 – 1.28 (m, 9H). <sup>13</sup>C NMR (100 MHz, CDCl<sub>3</sub>, 300 K): δ (ppm) = 166.7, 158.6, 156.9, 151.6, 82.4, 63.7, 63.5, 62.1, 14.3, 14.2, 13.9. HRMS (ESI) m/z: [M+H]<sup>+</sup> Calculated for C<sub>12</sub>H<sub>17</sub>D<sub>3</sub>N<sub>3</sub>O<sub>6</sub>: 305.1535; Found: 305.1554.

### 3-Ethyl 1,2-diisopropyl 5-methyl-1*H*-1,2,4-triazole-1,2,3(3*H*)-tricarboxylate (11u)

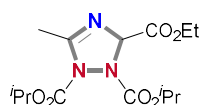

According to *GPI* with diazo compound (45.6 mg, 0.40 mmol, 4.0 equiv.) and diisopropyl azodicarboxylate (20.2 mg, 0.10 mmol, 1.0 equiv.) in 1.0 mL acetonitrile for 12 h. Purification by silica gel chromatography afforded the desired product and as a colorless oil in 64% yield (21.1 mg). <sup>1</sup>H NMR (400 MHz, CDCl<sub>3</sub>, 300 K): δ (ppm) = 5.96 (d, *J* = 1.3 Hz, 1H), 5.12 – 4.96 (m, 2H), 4.26 – 4.17 (m, 2H), 2.48 (d, *J* = 1.3 Hz, 3H), 1.35 – 1.27 (m, 15H). <sup>13</sup>C NMR (100 MHz, CDCl<sub>3</sub>, 300 K): δ (ppm) = 166.7, 158.8, 156.5, 151.2, 82.2, 71.8, 71.7, 62.0, 21.9, 21.8, 21.7, 17.2, 13.9. HRMS (ESI) m/z: [M+H]<sup>+</sup> Calculated for C<sub>14</sub>H<sub>24</sub>N<sub>3</sub>O<sub>6</sub>: 330.1660; Found: 330.1676.

### 1,2-Di-*tert*-butyl 3-ethyl 5-methyl-1*H*-1,2,4-triazole-1,2,3(3*H*)-tricarboxylate (11v)

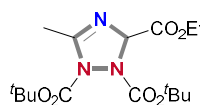

According to *GPI* with diazo compound (45.6 mg, 0.40 mmol, 4.0 equiv.) and di-*tert*-butyl azodicarboxylate (23.0 mg, 0.10 mmol, 1.0 equiv.) in 1.0 mL acetonitrile for 12 h. Purification by silica gel chromatography afforded the desired product and as a colorless oil in 78% yield (27.9 mg). <sup>1</sup>H NMR (400 MHz, CDCl<sub>3</sub>, 300 K): δ (ppm) = 5.89 (s, 1H), 4.25 – 4.17 (m, 2H), 2.46 (d, *J* = 1.3 Hz, 3H), 1.53 (s, 9H), 1.50 (s, 9H), 1.29 (t, *J* = 7.1 Hz, 3H). <sup>13</sup>C NMR (100 MHz, CDCl<sub>3</sub>, 300 K): δ (ppm) = 167.0, 158.9, 155.4, 150.1, 83.7, 83.4, 82.0, 61.8, 28.0, 28.0, 27.9, 17.4, 14.0. HRMS (ESI) m/z: [M+H]<sup>+</sup> Calculated for C<sub>16</sub>H<sub>28</sub>N<sub>3</sub>O<sub>6</sub>: 358.1973; Found: 358.1984.

### 1,2-Dibenzyl 3-ethyl 5-methyl-1*H*-1,2,4-triazole-1,2,3(3*H*)-tricarboxylate (11w)

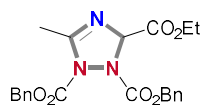

According to *GPI* with diazo compound (45.6 mg, 0.40 mmol, 4.0 equiv.) and dibenzyl azodicarboxylate (29.8 mg, 0.10 mmol, 1.0 equiv.) in 1.0 mL acetonitrile for 12 h. Purification by silica gel chromatography afforded the desired product and as a colorless oil in 61% yield (25.9 mg). <sup>1</sup>H NMR (400 MHz, CDCl<sub>3</sub>, 300 K): δ (ppm) = 7.33 (d, *J* = 4.3 Hz, 10H), 6.02 (d, *J* = 1.3 Hz, 1H), 5.28 – 5.16 (m, 4H), 4.23 – 4.11 (m, 2H), 2.47 (d, *J* = 1.3 Hz, 3H), 1.23 (t, *J* = 7.1 Hz, 3H). <sup>13</sup>C NMR (100 MHz, CDCl<sub>3</sub>, 300 K): δ (ppm) = 166.4, 158.6, 156.7, 151.6, 134.9, 128.6, 128.6, 128.6, 128.5, 128.1, 128.0, 82.5, 69.0, 68.9, 62.1, 17.2, 13.9. HRMS (ESI) m/z: [M+H]<sup>+</sup> Calculated for C<sub>22</sub>H<sub>24</sub>N<sub>3</sub>O<sub>6</sub>: 426.1660; Found: 426.1678.

### 1,2-Diethyl 3-methyl 5-methyl-3-phenyl-1*H*-1,2,4-triazole-1,2,3(3*H*)-tricarboxylate (13a)

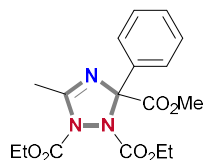

According to *GPI* with diazo compound (70.4 mg, 0.40 mmol, 4.0 equiv.) and diethyl azodicarboxylate (17.4 mg, 0.10 mmol, 1.0 equiv.) in 1.0 mL acetonitrile for 12 h. Purification by silica gel chromatography afforded the desired product and as a colorless oil in 87% yield (31.6 mg). <sup>1</sup>H NMR (400 MHz, CDCl<sub>3</sub>, 300 K): δ (ppm) = 7.63 (d, *J* = 8.2 Hz, 2H), 7.38 (q, *J* = 8.7, 7.6 Hz, 3H), 4.31 – 4.19 (m, 4H), 3.75 (s, 3H), 2.45 (s, 3H), 1.34 – 1.24 (m, 6H). <sup>13</sup>C NMR (100 MHz, CDCl<sub>3</sub>, 300 K): δ (ppm) = 168.3, 156.1, 155.2, 151.2, 137.5, 128.6, 128.0, 127.2, 94.1, 63.7, 63.2, 53.4, 17.0, 14.3, 14.1. HRMS (ESI) *m/z*: [M+H]<sup>+</sup> Calculated for C<sub>17</sub>H<sub>22</sub>N<sub>3</sub>O<sub>6</sub>: 364.1503; Found: 364.1506.

### 1,2-Diethyl 3-methyl 5-methyl-3-(*p*-tolyl)-1*H*-1,2,4-triazole-1,2,3(3*H*)-tricarboxylate (13b)

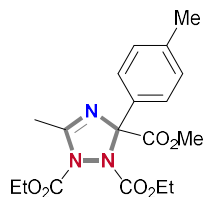

According to *GPI* with diazo compound (76.0 mg, 0.40 mmol, 4.0 equiv.) and diethyl azodicarboxylate (17.4 mg, 0.10 mmol, 1.0 equiv.) in 1.0 mL acetonitrile for 12 h. Purification by silica gel chromatography afforded the desired product and as a colorless oil in 60% yield (22.6 mg). <sup>1</sup>H NMR (400 MHz, CDCl<sub>3</sub>, 300 K): δ (ppm) = 7.50 (d, *J* = 8.1 Hz, 2H), 7.18 (d, *J* = 8.0 Hz, 2H), 4.31 – 4.16 (m, 4H), 3.74 (s, 3H), 2.42 (s, 3H), 2.35 (s, 3H), 1.34 – 1.23 (m, 6H). <sup>13</sup>C NMR (100 MHz, CDCl<sub>3</sub>, 300 K): δ (ppm) = 168.3, 156.0, 155.2, 151.2, 138.5, 134.6, 128.7, 127.1, 94.1, 63.7, 63.1, 53.4, 21.1, 17.0, 14.2, 14.1. HRMS (ESI) *m/z*: [M+H]<sup>+</sup> Calculated for C<sub>18</sub>H<sub>24</sub>N<sub>3</sub>O<sub>6</sub>: 378.1660; Found: 378.1659.

### 1,2-Diethyl 3-methyl 3-(4-fluorophenyl)-5-methyl-1*H*-1,2,4-triazole-1,2,3(3*H*)-tricarboxylate (13c)

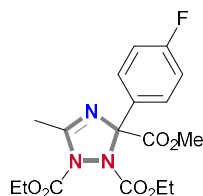

According to *GPI* with diazo compound (77.6 mg, 0.40 mmol, 4.0 equiv.) and diethyl azodicarboxylate (17.4 mg, 0.10 mmol, 1.0 equiv.) in 1.0 mL acetonitrile for 12 h. Purification by silica gel chromatography afforded the desired product and as a colorless oil in 89% yield (33.9 mg). <sup>1</sup>H NMR (400 MHz, CDCl<sub>3</sub>, 300 K): δ (ppm) = 7.64 – 7.56 (m, 2H), 7.06 (t, *J* = 8.7 Hz, 2H), 4.33 – 4.18 (m, 4H), 3.75 (s, 3H), 2.45 (s, 3H), 1.35 – 1.24 (m, 6H). <sup>13</sup>C NMR (100 MHz, CDCl<sub>3</sub>, 300 K): δ (ppm) = 168.1, 164.1, 161.6, 156.3, 155.1, 151.1, 133.5, 133.4, 129.2, 129.1, 115.0, 114.8, 93.6, 63.8, 63.3, 53.5, 17.0, 14.3, 14.1. HRMS (ESI) *m/z*: [M+H]<sup>+</sup> Calculated for C<sub>17</sub>H<sub>21</sub>FN<sub>3</sub>O<sub>6</sub>: 382.1409; Found: 382.1409.

### 1,2-Diethyl 3-methyl 3-(4-chlorophenyl)-5-methyl-1*H*-1,2,4-triazole-1,2,3(3*H*)-tricarboxylate (13d)

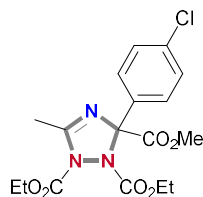

According to *GPI* with diazo compound (84.0 mg, 0.40 mmol, 4.0 equiv.) and diethyl azodicarboxylate (17.4 mg, 0.10 mmol, 1.0 equiv.) in 1.0 mL acetonitrile for 12 h. Purification by silica gel chromatography afforded the desired product and as a colorless oil in 91% yield (36.1 mg). <sup>1</sup>H NMR (400 MHz, CDCl<sub>3</sub>, 300 K): δ (ppm) = 7.56 (d, *J* = 8.5 Hz, 2H), 7.35 (d, *J* = 8.6 Hz, 2H), 4.34 – 4.17 (m, 4H), 3.75 (s, 3H), 2.44 (s, 3H), 1.35 – 1.25 (m, 6H). <sup>13</sup>C NMR (100 MHz, CDCl<sub>3</sub>, 300 K): δ (ppm) = 168.0, 156.4, 155.1, 151.1, 136.2, 134.6, 128.7, 128.2, 93.6, 63.9, 63.3,

53.5, 17.0, 14.3, 14.1. **HRMS** (ESI)  $m/z$ :  $[M+H]^+$  Calculated for  $C_{17}H_{21}ClN_3O_6$ : 398.1113; Found: 398.1111.

**1,2-Diethyl 3-methyl 3-(4-bromophenyl)-5-methyl-1H-1,2,4-triazole-1,2,3(3H)-tricarboxylate (13e)**

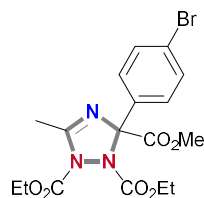

According to *GPI* with diazo compound (101.6 mg, 0.40 mmol, 4.0 equiv.) and diethyl azodicarboxylate (17.4 mg, 0.10 mmol, 1.0 equiv.) in 1.0 mL acetonitrile for 12 h. Purification by silica gel chromatography afforded the desired product and as a colorless oil in 95% yield (41.9 mg).  **$^1H$  NMR** (400 MHz,  $CDCl_3$ , 300 K):  $\delta$  (ppm) = 7.50 (s, 4H), 4.32 – 4.17 (m, 4H), 3.75 (s, 3H), 2.44 (s, 3H), 1.34 – 1.24 (m, 6H).  **$^{13}C$  NMR** (100 MHz,  $CDCl_3$ , 300 K):  $\delta$  (ppm) = 167.9, 156.5, 155.1, 151.0, 136.7, 131.3, 131.1, 129.0, 128.8, 122.9, 93.6, 63.9, 63.3, 53.5, 17.0, 14.2, 14.1. **HRMS** (ESI)  $m/z$ :  $[M+H]^+$  Calculated for  $C_{17}H_{21}BrN_3O_6$ : 442.0608; Found: 442.0607.

**1,2-Diethyl 3-methyl 5-methyl-3-(4-(trifluoromethyl)phenyl)-1H-1,2,4-triazole-1,2,3(3H)-tricarboxylate (13f)**

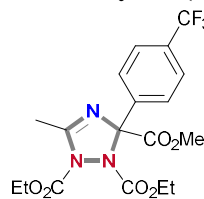

According to *GPI* with diazo compound (97.6 mg, 0.40 mmol, 4.0 equiv.) and diethyl azodicarboxylate (17.4 mg, 0.10 mmol, 1.0 equiv.) in 1.0 mL acetonitrile for 12 h. Purification by silica gel chromatography afforded the desired product and as a colorless oil in 94% yield (40.5 mg).  **$^1H$  NMR** (400 MHz,  $CDCl_3$ , 300 K):  $\delta$  (ppm) = 7.76 (d,  $J$  = 8.2 Hz, 2H), 7.64 (d,  $J$  = 8.3 Hz, 2H), 4.36 – 4.21 (m, 4H), 3.76 (s, 3H), 2.45 (s, 3H), 1.35 – 1.26 (m, 6H).  **$^{13}C$  NMR** (100 MHz,  $CDCl_3$ , 300 K):  $\delta$  (ppm) = 167.8, 156.7, 155.1, 151.0, 141.5, 130.9 (d,  $J$  = 32.2 Hz), 127.7, 125.0 (d,  $J$  = 3.8 Hz), 93.7, 64.0, 63.4, 53.6, 17.0, 14.2, 14.1. **HRMS** (ESI)  $m/z$ :  $[M+H]^+$  Calculated for  $C_{18}H_{21}F_3N_3O_6$ : 432.1377; Found: 432.1377.

**1,2-Diethyl 3-methyl 3-([1,1'-biphenyl]-4-yl)-5-methyl-1H-1,2,4-triazole-1,2,3(3H)-tricarboxylate (13g)**

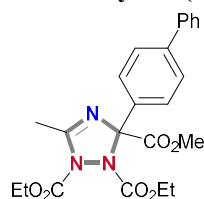

According to *GPI* with diazo compound (100.8 mg, 0.40 mmol, 4.0 equiv.) and diethyl azodicarboxylate (17.4 mg, 0.10 mmol, 1.0 equiv.) in 1.0 mL acetonitrile for 12 h. Purification by silica gel chromatography afforded the desired product and as a colorless oil in 63% yield (27.7 mg).  **$^1H$  NMR** (400 MHz,  $CDCl_3$ , 300 K):  $\delta$  (ppm) = 7.70 (d,  $J$  = 8.5 Hz, 2H), 7.64 – 7.56 (m, 4H), 7.44 (t,  $J$  = 7.5 Hz, 2H), 7.35 (t,  $J$  = 7.4 Hz, 1H), 4.35 – 4.19 (m, 4H), 3.78 (s, 3H), 2.46 (s, 3H), 1.36 – 1.26 (m, 6H).  **$^{13}C$  NMR** (100 MHz,  $CDCl_3$ , 300 K):  $\delta$  (ppm) = 168.3, 156.2, 155.2, 151.2, 141.6, 140.7, 136.5, 128.7, 127.6, 127.4, 127.2, 126.8, 94.1, 63.8, 63.2, 53.5, 17.1, 14.3, 14.2. **HRMS** (ESI)  $m/z$ :  $[M+H]^+$  Calculated for  $C_{23}H_{26}N_3O_6$ : 440.1816; Found: 440.1795.

**1,2-Diethyl 3-methyl 5-methyl-3-(o-tolyl)-1H-1,2,4-triazole-1,2,3(3H)-tricarboxylate (13h)**

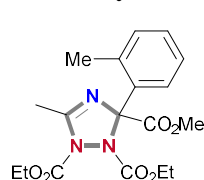

According to *GPI* with diazo compound (76.0 mg, 0.40 mmol, 4.0 equiv.) and diethyl azodicarboxylate (17.4 mg, 0.10 mmol, 1.0 equiv.) in 1.0 mL acetonitrile for 12 h. Purification by silica gel chromatography afforded the

desired product and as a colorless oil in 67% yield (25.3 mg).  $^1\text{H NMR}$  (400 MHz,  $\text{CDCl}_3$ , 300 K):  $\delta$  (ppm) = 7.64 (d,  $J$  = 8.3 Hz, 1H), 7.29 – 7.17 (m, 3H), 4.37 – 4.16 (m, 4H), 3.77 (s, 3H), 2.48 (s, 3H), 2.42 (s, 3H), 1.34 (t,  $J$  = 7.1 Hz, 3H), 1.26 (t,  $J$  = 7.1 Hz, 3H).  $^{13}\text{C NMR}$  (100 MHz,  $\text{CDCl}_3$ , 300 K):  $\delta$  (ppm) = 167.8, 155.5, 155.0, 151.2, 137.6, 135.0, 131.8, 128.7, 126.4, 125.5, 95.3, 63.6, 63.2, 53.3, 21.5, 17.0, 14.2, 14.2. **HRMS** (ESI)  $m/z$ :  $[\text{M}+\text{H}]^+$  Calculated for  $\text{C}_{18}\text{H}_{24}\text{N}_3\text{O}_6$ : 378.1660; Found: 378.1658.

**1,2-Diethyl 3-methyl 3-(2-chlorophenyl)-5-methyl-1H-1,2,4-triazole-1,2,3(3H)-tricarboxylate (13i)**

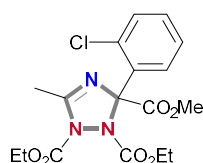

According to *GPI* with diazo compound (84.0 mg, 0.40 mmol, 4.0 equiv.) and diethyl azodicarboxylate (17.4 mg, 0.10 mmol, 1.0 equiv.) in 1.0 mL acetonitrile for 12 h. Purification by silica gel chromatography afforded the desired product and as a colorless oil in 92% yield (36.5 mg).  $^1\text{H NMR}$  (400 MHz,  $\text{CDCl}_3$ , 300 K):  $\delta$  (ppm) = 7.76 – 7.70 (m, 1H), 7.46 – 7.41 (m, 1H), 7.34 – 7.25 (m, 2H), 4.41 – 4.16 (m, 4H), 3.80 (s, 3H), 2.47 (s, 3H), 1.35 (t,  $J$  = 7.1 Hz, 3H), 1.28 – 1.20 (m, 3H).  $^{13}\text{C NMR}$  (100 MHz,  $\text{CDCl}_3$ , 300 K):  $\delta$  (ppm) = 166.8, 156.5, 154.9, 150.9, 134.5, 133.7, 131.2, 130.1, 128.0, 126.7, 94.2, 63.8, 63.4, 53.4, 17.0, 14.2, 14.1. **HRMS** (ESI)  $m/z$ :  $[\text{M}+\text{H}]^+$  Calculated for  $\text{C}_{17}\text{H}_{21}\text{ClN}_3\text{O}_6$ : 398.1133; Found: 398.1115.

**1,2-Diethyl 3-methyl 5-methyl-3-(naphthalen-2-yl)-1H-1,2,4-triazole-1,2,3(3H)-tricarboxylate (13j)**

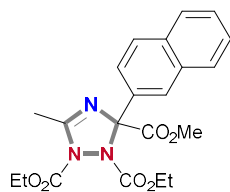

According to *GPI* with diazo compound (90.4 mg, 0.40 mmol, 4.0 equiv.) and diethyl azodicarboxylate (17.4 mg, 0.10 mmol, 1.0 equiv.) in 1.0 mL acetonitrile for 12 h. Purification by silica gel chromatography afforded the desired product and as a colorless oil in 71% yield (29.3 mg).  $^1\text{H NMR}$  (400 MHz,  $\text{CDCl}_3$ , 300 K):  $\delta$  (ppm) = 8.07 (s, 1H), 7.85 (t,  $J$  = 8.4 Hz, 3H), 7.76 – 7.73 (m, 1H), 7.52 – 7.45 (m, 2H), 4.36 – 4.20 (m, 4H), 3.77 (s, 3H), 2.47 (s, 3H), 1.35 – 1.26 (m, 6H).  $^{13}\text{C NMR}$  (100 MHz,  $\text{CDCl}_3$ , 300 K):  $\delta$  (ppm) = 168.3, 156.4, 155.3, 151.2, 135.0, 133.4, 132.8, 128.6, 127.6, 127.6, 126.5, 126.1, 126.0, 125.3, 94.2, 63.8, 63.3, 53.5, 17.1, 14.3, 14.2. **HRMS** (ESI)  $m/z$ :  $[\text{M}+\text{H}]^+$  Calculated for  $\text{C}_{21}\text{H}_{24}\text{N}_3\text{O}_6$ : 414.1660; Found: 414.1660.

**Triethyl 5-methyl-3-phenyl-1H-1,2,4-triazole-1,2,3(3H)-tricarboxylate (13k)**

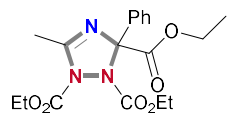

According to *GPI* with diazo compound (76.0 mg, 0.40 mmol, 4.0 equiv.) and diethyl azodicarboxylate (17.4 mg, 0.10 mmol, 1.0 equiv.) in 1.0 mL acetonitrile for 12 h. Purification by silica gel chromatography afforded the desired product and as a colorless oil in 81% yield (30.6 mg).  $^1\text{H NMR}$  (400 MHz,  $\text{CDCl}_3$ , 300 K):  $\delta$  (ppm) = 7.63 (d,  $J$  = 8.4 Hz, 2H), 7.42 – 7.31 (m, 3H), 4.34 – 4.14 (m, 6H), 2.44 (s, 3H), 1.34 – 1.22 (m, 9H).  $^{13}\text{C NMR}$  (100 MHz,  $\text{CDCl}_3$ , 300 K):  $\delta$  (ppm) = 167.6, 156.0, 155.2, 151.2, 137.5, 128.5, 127.9, 127.3, 94.2, 63.7, 63.0, 62.8, 17.0, 14.2, 14.1, 13.9. **HRMS** (ESI)  $m/z$ :  $[\text{M}+\text{H}]^+$  Calculated for  $\text{C}_{18}\text{H}_{24}\text{N}_3\text{O}_6$ : 378.1660; Found: 378.1660.

**1,2-Diethyl 3-hexyl 5-methyl-3-phenyl-1H-1,2,4-triazole-1,2,3(3H)-tricarboxylate (13l)**

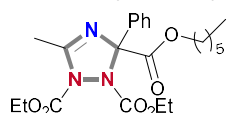

According to *GPI* with diazo compound (98.5 mg, 0.40 mmol, 4.0 equiv.) and diethyl azodicarboxylate (17.4 mg, 0.10 mmol, 1.0 equiv.) in 1.0 mL

acetonitrile for 12 h. Purification by silica gel chromatography afforded the desired product and as a colorless oil in 78% yield (33.8 mg). **<sup>1</sup>H NMR** (400 MHz, CDCl<sub>3</sub>, 300 K): δ (ppm) = 7.66 – 7.59 (m, 2H), 7.41 – 7.31 (m, 3H), 4.31 – 4.06 (m, 6H), 2.44 (s, 3H), 1.64 – 1.56 (m, 2H), 1.34 – 1.23 (m, 12H), 0.87 (t, *J* = 6.7 Hz, 3H). **<sup>13</sup>C NMR** (100 MHz, CDCl<sub>3</sub>, 300 K): δ (ppm) = 167.7, 155.9, 155.2, 151.3, 137.6, 128.5, 127.9, 127.2, 94.2, 66.9, 63.7, 63.0, 31.2, 28.2, 25.3, 22.4, 17.0, 14.2, 14.1, 13.9. **HRMS** (ESI) *m/z*: [M+H]<sup>+</sup> Calculated for C<sub>22</sub>H<sub>32</sub>N<sub>3</sub>O<sub>6</sub>: 434.2286; Found: 434.2287.

### 3-Dodecyl 1,2-diethyl 5-methyl-3-phenyl-1*H*-1,2,4-triazole-1,2,3(3*H*)-tricarboxylate (13m)

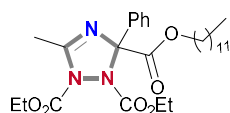

According to *GPI* with diazo compound (132.1 mg, 0.40 mmol, 4.0 equiv.) and diethyl azodicarboxylate (17.4 mg, 0.10 mmol, 1.0 equiv.) in 1.0 mL acetonitrile for 12 h. Purification by silica gel chromatography afforded the desired product and as a colorless oil in 77% yield (39.8 mg). **<sup>1</sup>H NMR** (400 MHz, CDCl<sub>3</sub>, 300 K): δ (ppm) = 7.63 (d, *J* = 6.9 Hz, 2H), 7.40 – 7.32 (m, 3H), 4.29 – 4.06 (m, 6H), 2.44 (s, 3H), 1.66 – 1.57 (m, 2H), 1.31 – 1.23 (m, 24H), 0.88 (t, *J* = 6.7 Hz, 3H). **<sup>13</sup>C NMR** (100 MHz, CDCl<sub>3</sub>, 300 K): δ (ppm) = 167.7, 155.9, 155.2, 151.3, 137.6, 128.5, 127.9, 127.2, 94.3, 66.9, 63.7, 63.0, 31.9, 29.6, 29.6, 29.5, 29.4, 29.3, 29.1, 28.2, 25.6, 22.7, 17.0, 14.4, 14.2, 14.1, 14.1. **HRMS** (ESI) *m/z*: [M+H]<sup>+</sup> Calculated for C<sub>28</sub>H<sub>44</sub>N<sub>3</sub>O<sub>6</sub>: 518.3225; Found: 518.3209.

### 3-Cyclopentyl 1,2-diethyl 5-methyl-3-phenyl-1*H*-1,2,4-triazole-1,2,3(3*H*)-tricarboxylate (13n)

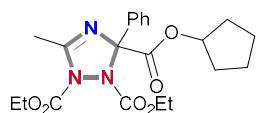

According to *GPI* with diazo compound (92.0 mg, 0.40 mmol, 4.0 equiv.) and diethyl azodicarboxylate (17.4 mg, 0.10 mmol, 1.0 equiv.) in 1.0 mL acetonitrile for 12 h. Purification by silica gel chromatography afforded the desired product and as a white solid in 81% yield (33.8 mg). **<sup>1</sup>H NMR** (400 MHz, CDCl<sub>3</sub>, 300 K): δ (ppm) = 7.66 – 7.59 (m, 2H), 7.40 – 7.30 (m, 3H), 5.21 – 5.15 (m, 1H), 4.33 – 4.15 (m, 4H), 2.43 (s, 3H), 1.83 – 1.54 (m, 8H), 1.34 – 1.24 (m, 6H). **<sup>13</sup>C NMR** (100 MHz, CDCl<sub>3</sub>, 300 K): δ (ppm) = 167.2, 155.8, 155.2, 151.3, 137.6, 128.4, 127.8, 127.3, 94.2, 79.9, 63.7, 62.9, 32.6, 32.1, 23.5, 23.5, 16.9, 14.2, 14.1. **HRMS** (ESI) *m/z*: [M+H]<sup>+</sup> Calculated for C<sub>21</sub>H<sub>28</sub>N<sub>3</sub>O<sub>6</sub>: 418.1973; Found: 418.1970.

### 3-Cyclobutyl 1,2-diethyl 5-methyl-3-phenyl-1*H*-1,2,4-triazole-1,2,3(3*H*)-tricarboxylate (13o)

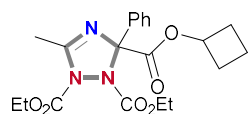

According to *GPI* with diazo compound (86.4 mg, 0.40 mmol, 4.0 equiv.) and diethyl azodicarboxylate (17.4 mg, 0.10 mmol, 1.0 equiv.) in 1.0 mL acetonitrile for 12 h. Purification by silica gel chromatography afforded the desired product and as a colorless oil in 84% yield (33.9 mg). **<sup>1</sup>H NMR** (400 MHz, CDCl<sub>3</sub>, 300 K): δ (ppm) = 7.63 (d, *J* = 8.8 Hz, 2H), 7.42 – 7.31 (m, 3H), 5.07 – 4.96 (m, 1H), 4.33 – 4.12 (m, 4H), 2.45 (s, 3H), 2.38 – 2.25 (m, 2H), 2.13 – 2.00 (m, 2H), 1.83 – 1.71 (m, 1H), 1.63 – 1.54 (m, 1H), 1.35 – 1.24 (m, 6H). **<sup>13</sup>C NMR** (100 MHz, CDCl<sub>3</sub>, 300 K): δ (ppm) = 166.8, 156.0, 155.2, 151.3, 137.5, 128.5, 127.9, 127.3, 94.0, 70.9, 63.7, 63.0, 30.1, 29.8, 17.0, 14.2, 14.1, 13.3. **HRMS** (ESI) *m/z*: [M+H]<sup>+</sup> Calculated for C<sub>20</sub>H<sub>26</sub>N<sub>3</sub>O<sub>6</sub>: 404.1816; Found: 404.1816.

### 1,2-Diethyl 3-(2-methylallyl) 5-methyl-3-phenyl-1*H*-1,2,4-triazole-1,2,3(3*H*)-tricarboxylate (13p)

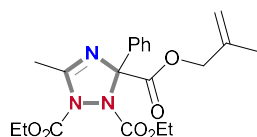

According to *GPI* with diazo compound (86.4 mg, 0.40 mmol, 4.0 equiv.) and diethyl azodicarboxylate (17.4 mg, 0.10 mmol, 1.0 equiv.) in 1.0 mL acetonitrile for 12 h. Purification by silica gel chromatography afforded the desired product and as a colorless oil in 73% yield (29.4 mg). <sup>1</sup>H NMR (400 MHz, CDCl<sub>3</sub>, 300 K): δ (ppm) = 7.65 (d, *J* = 8.4 Hz, 2H), 7.42 – 7.32 (m, 3H), 4.89 (d, *J* = 3.6 Hz, 2H), 4.59 (d, *J* = 13.2 Hz, 1H), 4.49 (d, *J* = 13.2 Hz, 1H), 4.32 – 4.15 (m, 4H), 2.45 (s, 3H), 1.68 (s, 3H), 1.35 – 1.22 (m, 6H). <sup>13</sup>C NMR (100 MHz, CDCl<sub>3</sub>, 300 K): δ (ppm) = 167.4, 156.1, 155.2, 151.3, 138.8, 137.5, 128.6, 127.9, 127.2, 113.4, 94.3, 69.6, 63.7, 63.1, 19.3, 17.0, 14.2, 14.1. HRMS (ESI) *m/z*: [M+H]<sup>+</sup> Calculated for C<sub>20</sub>H<sub>26</sub>N<sub>3</sub>O<sub>6</sub>: 404.1816; Found: 404.1816.

**3-(3,7-Dimethyloct-6-en-1-yl) 1,2-diethyl 5-methyl-3-phenyl-1H-1,2,4-triazole-1,2,3(3H)-tricarboxylate (13q)**

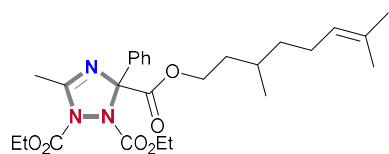

According to *GPI* with diazo compound (120.0 mg, 0.40 mmol, 4.0 equiv.) and diethyl azodicarboxylate (17.4 mg, 0.10 mmol, 1.0 equiv.) in 1.0 mL acetonitrile for 12 h. Purification by silica gel chromatography afforded the desired product and as a colorless oil in 65% yield (31.7 mg). <sup>1</sup>H NMR (400 MHz, CDCl<sub>3</sub>, 300 K): δ (ppm) = 7.63 (d, *J* = 6.7 Hz, 2H), 7.42 – 7.31 (m, 3H), 5.06 (t, *J* = 7.2 Hz, 1H), 4.33 – 4.09 (m, 6H), 2.44 (s, 3H), 2.01 – 1.83 (m, 2H), 1.68 (s, 3H), 1.59 (s, 4H), 1.49 – 1.36 (m, 2H), 1.34 – 1.22 (m, 7H), 1.18 – 1.08 (m, 1H), 0.88 – 0.82 (m, 3H). <sup>13</sup>C NMR (100 MHz, CDCl<sub>3</sub>, 300 K): δ (ppm) = 167.8, 156.0, 155.2, 151.3, 137.6, 131.3, 128.5, 127.9, 127.2, 124.5, 94.2, 65.4, 65.4, 63.7, 63.0, 36.9, 36.9, 35.1, 35.0, 29.5, 29.5, 25.7, 25.4, 19.3, 17.6, 17.0, 14.3, 14.1. HRMS (ESI) *m/z*: [M+H]<sup>+</sup> Calculated for C<sub>26</sub>H<sub>38</sub>N<sub>3</sub>O<sub>6</sub>: 488.2755; Found: 488.2754.

**1,2-Diethyl 3-((1S,2R,5S)-2-isopropyl-5-methylcyclohexyl) 5-methyl-3-phenyl-1H-1,2,4-triazole-1,2,3(3H)-tricarboxylate (13r)**

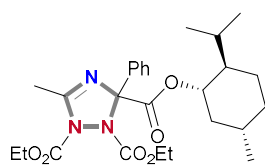

According to *GPI* with diazo compound (120.0 mg, 0.40 mmol, 4.0 equiv.) and diethyl azodicarboxylate (17.4 mg, 0.10 mmol, 1.0 equiv.) in 1.0 mL acetonitrile for 12 h. Purification by silica gel chromatography afforded the desired product and as a colorless oil in 71% yield (34.6 mg). <sup>1</sup>H NMR (400 MHz, CDCl<sub>3</sub>, 300 K): δ (ppm) = 7.67 – 7.59 (m, 2H), 7.42 – 7.30 (m, 3H), 4.70 – 4.60 (m, 1H), 4.35 – 4.10 (m, 4H), 2.42 (s, 3H), 2.09 – 2.01 (m, 1H), 1.82 – 1.73 (m, 1H), 1.70 – 1.60 (m, 2H), 1.51 – 1.39 (m, 1H), 1.33 – 1.26 (m, 7H), 1.09 – 0.97 (m, 1H), 0.95 – 0.86 (m, 5H), 0.82 (d, *J* = 7.0 Hz, 3H), 0.73 (d, *J* = 6.9 Hz, 3H). <sup>13</sup>C NMR (100 MHz, CDCl<sub>3</sub>, 300 K): δ (ppm) = 166.8, 155.8, 155.1, 151.5, 137.5, 128.4, 127.8, 127.4, 94.4, 63.7, 62.9, 47.0, 40.2, 34.1, 31.3, 25.9, 23.4, 22.0, 20.6, 16.8, 16.3, 14.3, 14.1. HRMS (ESI) *m/z*: [M+H]<sup>+</sup> Calculated for C<sub>26</sub>H<sub>38</sub>N<sub>3</sub>O<sub>6</sub>: 488.2755; Found: 488.2753.

**1,2-Diethyl 3-((1R,2S,4S)-1,7,7-trimethylbicyclo[2.2.1]heptan-2-yl) 5-methyl-3-phenyl-1H-1,2,4-triazole-1,2,3(3H)-tricarboxylate (13s)**

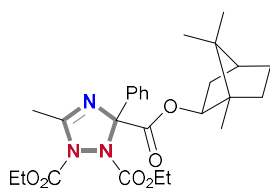

According to *GPI* with diazo compound (119.3 mg, 0.40 mmol, 4.0 equiv.) and diethyl azodicarboxylate (17.4 mg, 0.10 mmol, 1.0 equiv.) in 1.0 mL acetonitrile for 12 h. Purification by silica gel chromatography afforded the desired product and as a colorless oil in 74% yield (d.r. = 2:1, 35.9 mg). **<sup>1</sup>H NMR** (400 MHz, CDCl<sub>3</sub>, 300 K): δ (ppm) = 7.65 (d, *J* = 6.7 Hz, 2H), 7.41 – 7.30 (m, 3H), 4.93 – 4.85 (m, 0.66H), 4.81 – 4.75 (m, 0.33H), 4.36 – 4.15 (m, 4H), 2.45 (d, *J* = 3.1 Hz, 3H), 2.40 – 2.25 (m, 1H), 1.74 – 1.61 (m, 2H), 1.57 – 1.47 (m, 1H), 1.34 – 1.25 (m, 6H), 1.20 – 0.99 (m, 3H), 0.88 – 0.82 (m, 6H), 0.79 (d, *J* = 18.4 Hz, 3H). **<sup>13</sup>C NMR** (100 MHz, CDCl<sub>3</sub>, 300 K): δ (ppm) = 167.8, 155.9, 155.2, 151.5, 137.7, 128.4, 127.8, 127.3, 94.3, 83.1, 82.6, 63.7, 63.0, 49.1, 48.8, 47.8, 47.7, 44.8, 44.7, 36.5, 36.0, 27.8, 27.7, 26.7, 19.6, 18.8, 16.9, 14.2, 14.2, 13.4, 13.3. **HRMS** (ESI) *m/z*: [M+H]<sup>+</sup> Calculated for C<sub>26</sub>H<sub>36</sub>N<sub>3</sub>O<sub>6</sub>: 486.2599; Found: 486.2598.

### 1,2-Diisopropyl 3-methyl 5-methyl-3-phenyl-1H-1,2,4-triazole-1,2,3(3H)-tricarboxylate (13t)

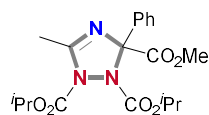

According to *GPI* with diazo compound (70.4 mg, 0.40 mmol, 4.0 equiv.) and diisopropyl azodicarboxylate (20.2 mg, 0.10 mmol, 1.0 equiv.) in 1.0 mL acetonitrile for 12 h. Purification by silica gel chromatography afforded the desired product and as a colorless oil in 82% yield (32.1 mg). **<sup>1</sup>H NMR** (400 MHz, CDCl<sub>3</sub>, 300 K): δ (ppm) = 7.66 – 7.58 (m, 2H), 7.41 – 7.32 (m, 3H), 5.06 – 4.95 (m, 2H), 3.75 (s, 3H), 2.43 (s, 3H), 1.34 – 1.24 (m, 12H). **<sup>13</sup>C NMR** (100 MHz, CDCl<sub>3</sub>, 300 K): δ (ppm) = 168.3, 156.3, 154.6, 150.8, 137.6, 128.5, 127.9, 127.2, 93.9, 72.2, 71.4, 53.3, 22.0, 21.7, 21.7, 17.1. **HRMS** (ESI) *m/z*: [M+H]<sup>+</sup> Calculated for C<sub>19</sub>H<sub>26</sub>N<sub>3</sub>O<sub>6</sub>: 392.1816; Found: 392.1816.

### 1,2-Di-tert-butyl 3-methyl 5-methyl-3-phenyl-1H-1,2,4-triazole-1,2,3(3H)-tricarboxylate (13u)

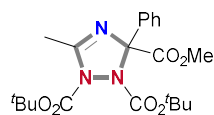

According to *GPI* with diazo compound (70.4 mg, 0.40 mmol, 4.0 equiv.) and di-tert-butyl azodicarboxylate (23.0 mg, 0.10 mmol, 1.0 equiv.) in 1.0 mL acetonitrile for 12 h. Purification by silica gel chromatography afforded the desired product and as a colorless oil in 87% yield (36.5 mg). **<sup>1</sup>H NMR** (400 MHz, CDCl<sub>3</sub>, 300 K): δ (ppm) = 7.66 – 7.59 (m, 2H), 7.42 – 7.30 (m, 3H), 3.75 (s, 3H), 2.40 (s, 3H), 1.50 (d, *J* = 9.9 Hz, 18H). **<sup>13</sup>C NMR** (100 MHz, CDCl<sub>3</sub>, 300 K): δ (ppm) = 168.6, 156.5, 153.7, 149.8, 137.9, 128.4, 127.8, 127.2, 93.6, 84.2, 83.1, 53.2, 28.0, 27.9, 17.2. **HRMS** (ESI) *m/z*: [M+H]<sup>+</sup> Calculated for C<sub>21</sub>H<sub>30</sub>N<sub>3</sub>O<sub>6</sub>: 420.2129; Found: 420.2117.

### 1,2-Dibenzyl 3-methyl 5-methyl-3-phenyl-1H-1,2,4-triazole-1,2,3(3H)-tricarboxylate (13v)

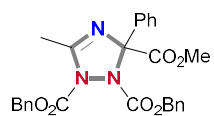

According to *GPI* with diazo compound (70.4 mg, 0.40 mmol, 4.0 equiv.) and dibenzyl azodicarboxylate (29.8 mg, 0.10 mmol, 1.0 equiv.) in 1.0 mL acetonitrile for 12 h. Purification by silica gel chromatography afforded the desired product and as a colorless oil in 91% yield (44.3 mg). **<sup>1</sup>H NMR** (400 MHz, CDCl<sub>3</sub>, 300 K): δ (ppm) = 7.63 – 7.56 (m, 2H), 7.37 – 7.26 (m, 13H), 5.25 – 5.09 (m, 4H), 3.46 (s, 3H), 2.42 (s, 3H). **<sup>13</sup>C NMR** (100 MHz, CDCl<sub>3</sub>, 300 K): δ (ppm) = 168.0, 156.1, 155.2, 151.2, 137.2, 135.0, 134.5, 128.7, 128.6, 128.5, 128.5, 128.4, 128.1, 128.0, 127.2, 94.2, 69.2, 68.6, 53.3, 17.1. **HRMS** (ESI) *m/z*: [M+H]<sup>+</sup> Calculated for C<sub>27</sub>H<sub>26</sub>N<sub>3</sub>O<sub>6</sub>: 488.1816; Found: 488.1812.



**Methyl 5-methyl-3-phenyl-1,2-di(piperidine-1-carbonyl)-2,3-dihydro-1H-1,2,4-triazole-3-carboxylate (13w)**

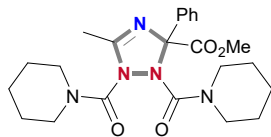

According to *GPI* with diazo compound (70.4 mg, 0.40 mmol, 4.0 equiv.) and 1,1'-(azodicarbonyl)-dipiperidine (25.2 mg, 0.10 mmol, 1.0 equiv.) in 1.0 mL acetonitrile for 12 h. Purification by silica gel chromatography afforded the desired product and as a colorless oil in 40% yield (17.7 mg). **<sup>1</sup>H NMR** (400 MHz, CDCl<sub>3</sub>, 300 K): δ (ppm) = 7.44 – 7.31 (m, 5H), 3.82 (s, 3H), 3.61 – 3.47 (m, 4H), 2.99 (s, 3H), 2.52 (s, 3H), 1.66 – 1.51 (m, 7H), 1.40 – 1.21 (m, 6H). **<sup>13</sup>C NMR** (100 MHz, CDCl<sub>3</sub>, 300 K): δ (ppm) = 170.3, 161.4, 158.4, 153.5, 133.8, 129.6, 128.0, 127.8, 95.8, 53.0, 46.8, 45.8, 26.0, 25.6, 24.5, 24.1, 16.3. **HRMS** (ESI) m/z: [M+H]<sup>+</sup> Calculated for C<sub>23</sub>H<sub>32</sub>N<sub>5</sub>O<sub>4</sub>: 442.2449; Found: 442.2446.

**1,2-Diethyl 3-methyl 3-phenyl-5-propyl-1H-1,2,4-triazole-1,2,3(3H)-tricarboxylate (13x)**

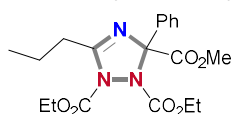

According to *GPI* with diazo compound (70.4 mg, 0.40 mmol, 4.0 equiv.) and diethyl azodicarboxylate (17.4 mg, 0.10 mmol, 1.0 equiv.) in 1.0 mL butyronitrile for 12 h. Purification by silica gel chromatography afforded the desired product and as a colorless oil in 55% yield (21.5 mg). **<sup>1</sup>H NMR** (400 MHz, CDCl<sub>3</sub>, 300 K): δ (ppm) = 7.63 (d, *J* = 8.2 Hz, 2H), 7.41 – 7.32 (m, 3H), 4.33 – 4.16 (m, 4H), 3.75 (s, 3H), 2.90 – 2.80 (m, 1H), 2.73 – 2.63 (m, 1H), 1.86 – 1.75 (m, 2H), 1.33 – 1.24 (m, 6H), 1.01 (t, *J* = 7.4 Hz, 3H). **<sup>13</sup>C NMR** (100 MHz, CDCl<sub>3</sub>, 300 K): δ (ppm) = 168.3, 159.5, 155.3, 151.3, 137.6, 128.6, 127.9, 127.2, 94.0, 63.6, 63.1, 53.3, 31.9, 19.8, 14.3, 14.1, 13.3. **HRMS** (ESI) m/z: [M+H]<sup>+</sup> Calculated for C<sub>19</sub>H<sub>26</sub>N<sub>3</sub>O<sub>6</sub>: 392.1816; Found: 392.1817.

**1,2-Diethyl 3-methyl 5-butyl-3-phenyl-1H-1,2,4-triazole-1,2,3(3H)-tricarboxylate (13y)**

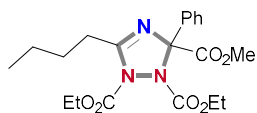

According to *GPI* with diazo compound (70.4 mg, 0.40 mmol, 4.0 equiv.) and diethyl azodicarboxylate (17.4 mg, 0.10 mmol, 1.0 equiv.) in 1.0 mL pentanenitrile for 12 h. Purification by silica gel chromatography afforded the desired product and as a colorless oil in 43% yield (17.4 mg). **<sup>1</sup>H NMR** (400 MHz, CDCl<sub>3</sub>, 300 K): δ (ppm) = 7.62 (d, *J* = 6.4 Hz, 2H), 7.41 – 7.33 (m, 3H), 4.32 – 4.17 (m, 4H), 3.75 (s, 3H), 2.91 – 2.80 (m, 1H), 2.77 – 2.67 (m, 1H), 1.80 – 1.70 (m, 2H), 1.46 – 1.37 (m, 2H), 1.33 – 1.24 (m, 6H), 0.94 (t, *J* = 7.4 Hz, 3H). **<sup>13</sup>C NMR** (100 MHz, CDCl<sub>3</sub>, 300 K): δ (ppm) = 168.4, 159.7, 155.3, 151.3, 137.6, 128.6, 127.9, 127.2, 94.0, 63.6, 63.1, 53.4, 29.9, 28.3, 22.1, 14.3, 14.1, 13.7. **HRMS** (ESI) m/z: [M+H]<sup>+</sup> Calculated for C<sub>20</sub>H<sub>28</sub>N<sub>3</sub>O<sub>6</sub>: 406.1973; Found: 406.1974.

## 5. Follow-up chemistry

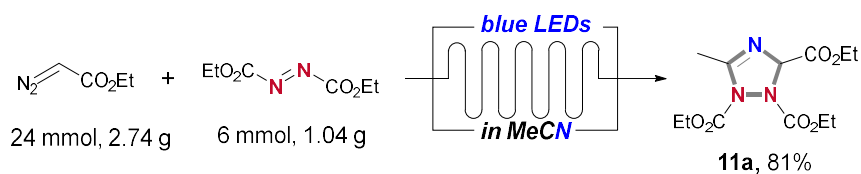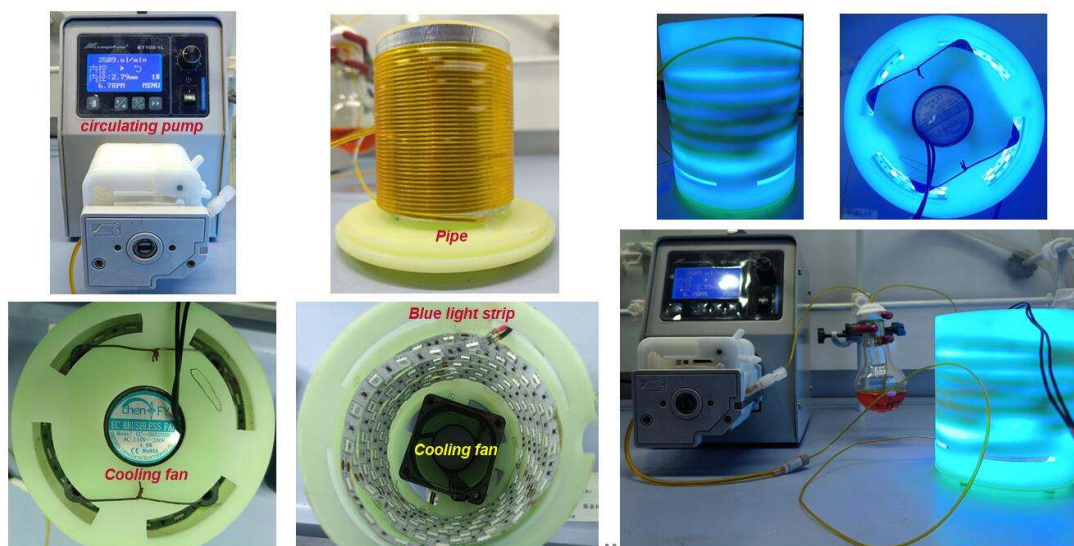

Ethyl diazoacetate (2.74 g, 24.0 mmol, 4.0 equiv.) and diethyl azodicarboxylate (1.04 g, 6.0 mmol, 1.0 equiv.) in dry  $\text{CH}_3\text{CN}$  (25 mL) was pushed *via* circulating pump to pass through the flow photoreactor (PFA tubing, O.D. 2.0 mm, I.D. 1.0 mm, 6.5 meters) under irradiation with blue light strip (20 W) equipped with a fan cooling. The flow rate is 2.509 mL/min and the flow protocol were recirculated. After 12 h, the solvent was removed by vacuum and the crude product were purified by flash chromatography on silica gel silica: 200~300; eluant: petroleum ether/ethyl acetate = 5:1 to provide pure product **11a** as a colorless oil in 81% yield (1.46 g).

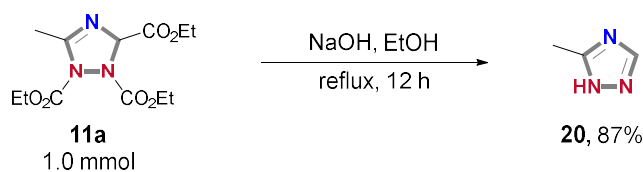

To a solution of **11a** (301 mg, 1.0 mmol) in EtOH was added NaOH (400 mg, 10 mmol), The reaction mixture was stirred for 12 h at 85 °C. The reaction mixture was warmed up to room temperature gradually and the reaction mixture was quenched with HCl extracted with EtOAc. The residue was purified by column chromatography (petroleum ether/EtOAc = 3/1) to afford **20** as white solid in 87% yield (72.2 mg).  $^1\text{H NMR}$  (400 MHz,  $\text{CDCl}_3$ , 300 K):  $\delta$  (ppm) = 9.24 (s, 1H), 8.02 (s, 1H), 2.51 (s, 3H).  $^{13}\text{C NMR}$  (100 MHz,  $\text{CDCl}_3$ , 300 K):  $\delta$  (ppm) = 155.1, 148.5, 12.3.

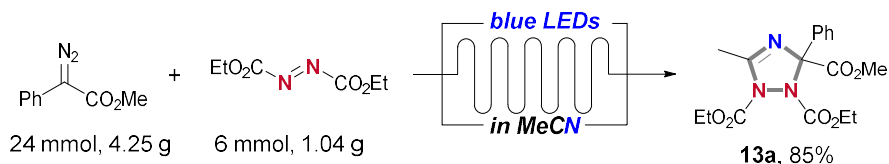

Methyl 2-diazo-2-phenylacetate (4.25 g, 24.0 mmol, 4.0 equiv.) and diethyl azodicarboxylate (1.04 g, 6.0 mmol, 1.0 equiv.) in dry CH<sub>3</sub>CN (25 mL) was pushed via circulating pump to pass through the flow photoreactor (PFA tubing, O.D. 2.0 mm, I.D. 1.0 mm, 6.5 meters) under irradiation with blue light strip (20 W) equipped with a fan cooling. The flow rate is 2.509 mL/min and the flow protocol were recirculated. After 12 h, the solvent was removed by vacuum and the crude product were purified by flash chromatography on silica gel silica: 200–300; eluant: petroleum ether/ethyl acetate = 5:1 to provide pure product **13a** as a colorless oil in 85% yield (1.85 g).

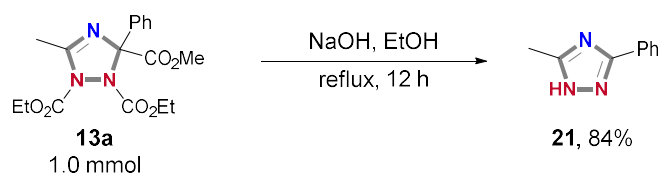

To a solution of **13a** (363 mg, 1.0 mmol) in EtOH was added NaOH (400 mg, 10 mmol), The reaction mixture was stirred for 12 h at 85 °C. The reaction mixture was warmed up to room temperature gradually and the reaction mixture was quenched with HCl extracted with EtOAc. The residue was purified by column chromatography (petroleum ether/EtOAc = 3/1) to afford **21** as white solid in 84% yield (133.6 mg). <sup>1</sup>H NMR (400 MHz, CDCl<sub>3</sub>, 300 K): δ (ppm) = 14.0 – 10.0 (s, 1H), 8.02 – 7.96 (m, 2H), 7.41 – 7.36 (m, 3H), 2.45 (s, 3H). <sup>13</sup>C NMR (100 MHz, CDCl<sub>3</sub>, 300 K): δ (ppm) = 160.6, 156.0, 129.7, 128.8, 126.4, 12.5.

## 6. TEMPO trapping experiment

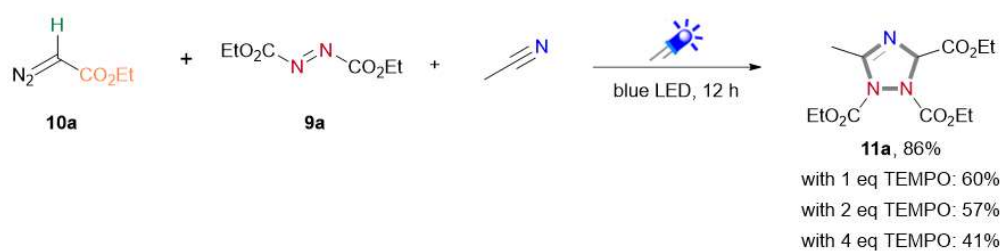

To a 10 mL Schlenk flask equipped with a magnetic stir bar was added ethyl diazoacetate (0.40 mmol), diethylazodicarboxylate (0.10 mmol), dry MeCN (1.0 mL) and TEMPO (1~4 equivalents). The resulting mixture was stirred at a distance of ~3 cm from a 24 W blue LED at room temperature for 12 h. The solvent was removed by vacuum and the crude product was purified by flash chromatography on silica gel silica: 200~300; eluant: petroleum ether/ethyl acetate (5:1~1:1) to provide pure product **11a** as a colorless oil.

## 7. Crystal data of 13n

Method for single crystals cultivation: The single crystal for compound **13n** (CCDC-2166508) were prepared from a mixture solvent of DCM and PE (v/v = 1:1). a pure solid sample (10–20 mg) was dissolved in DCM (2 mL) in a vial at room temperature, and PE (2-3 mL) was added into the above solution slowly while keeping the sample completely dissolved. The vial was properly sealed with parafilm and kept at room temperature to allow the slow evaporation of the solvents until a single crystal was obtained.

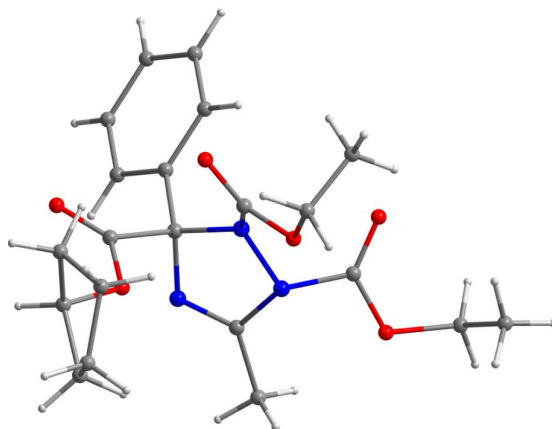

## 8. Copies of $^1\text{H}$ NMR and $^{13}\text{C}$ NMR spectra

### $^1\text{H}$ NMR (400 MHz) Spectrum of 11a in $\text{CDCl}_3$

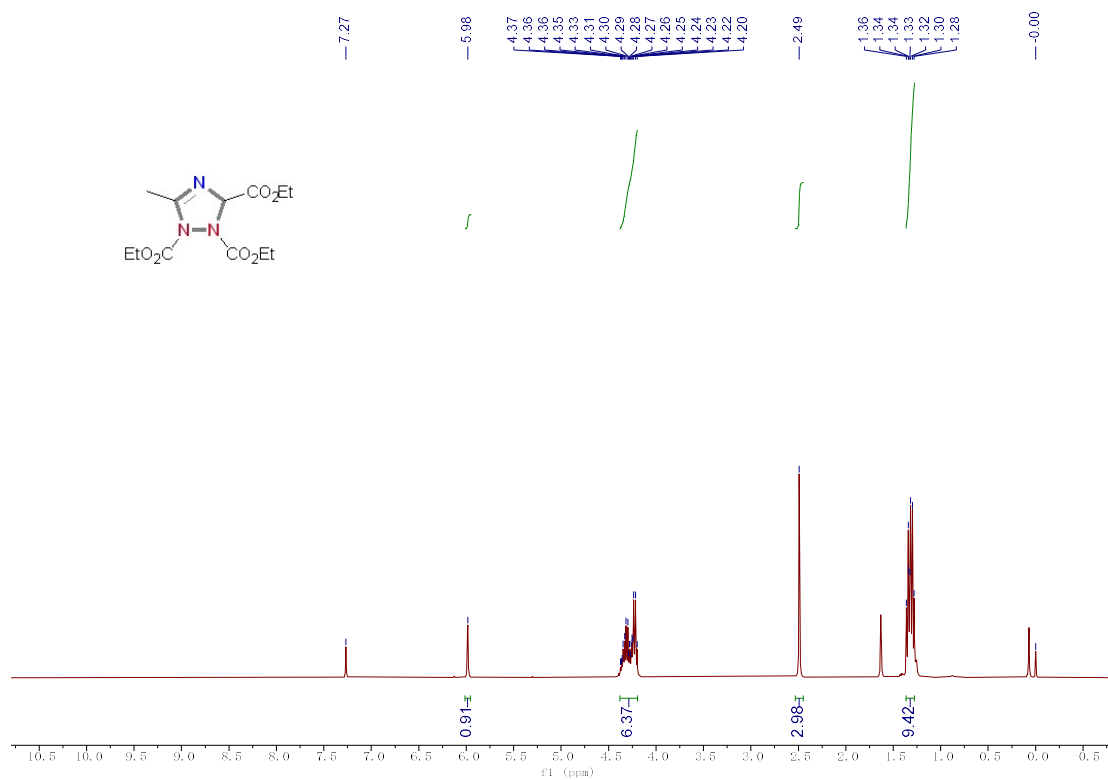

### $^{13}\text{C}$ NMR (100 MHz) Spectrum of 11a in $\text{CDCl}_3$

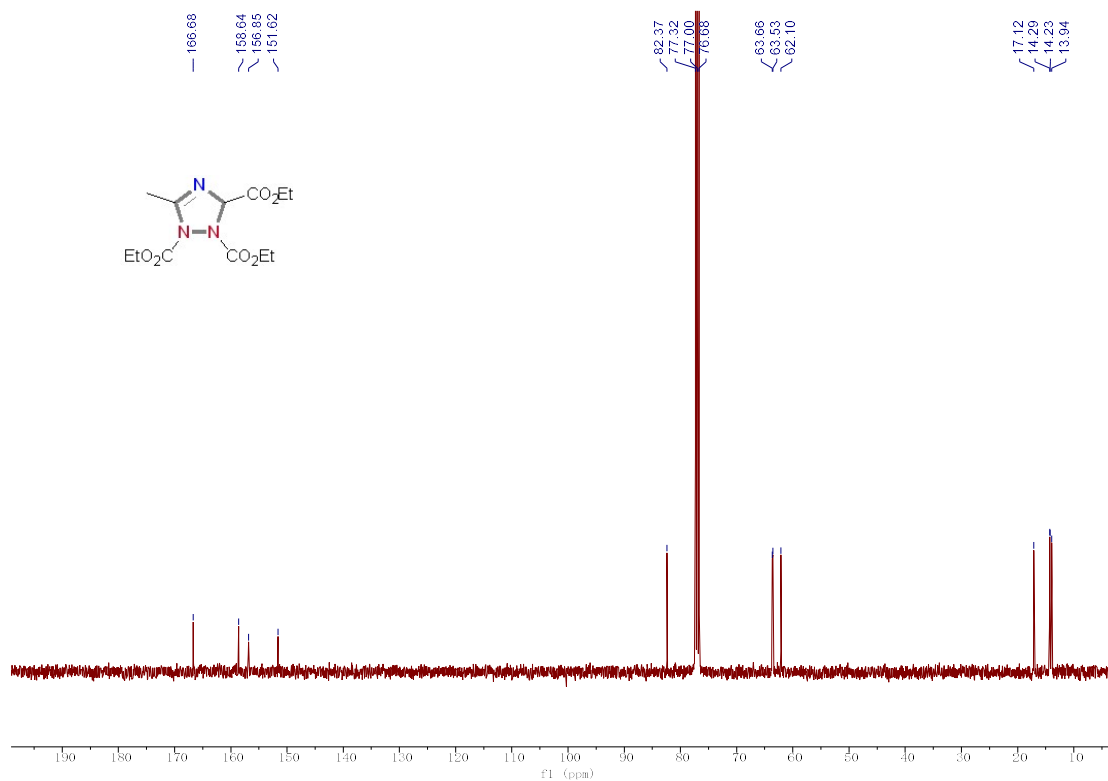

### <sup>1</sup>H NMR (400 MHz) Spectrum of 11b in CDCl<sub>3</sub>

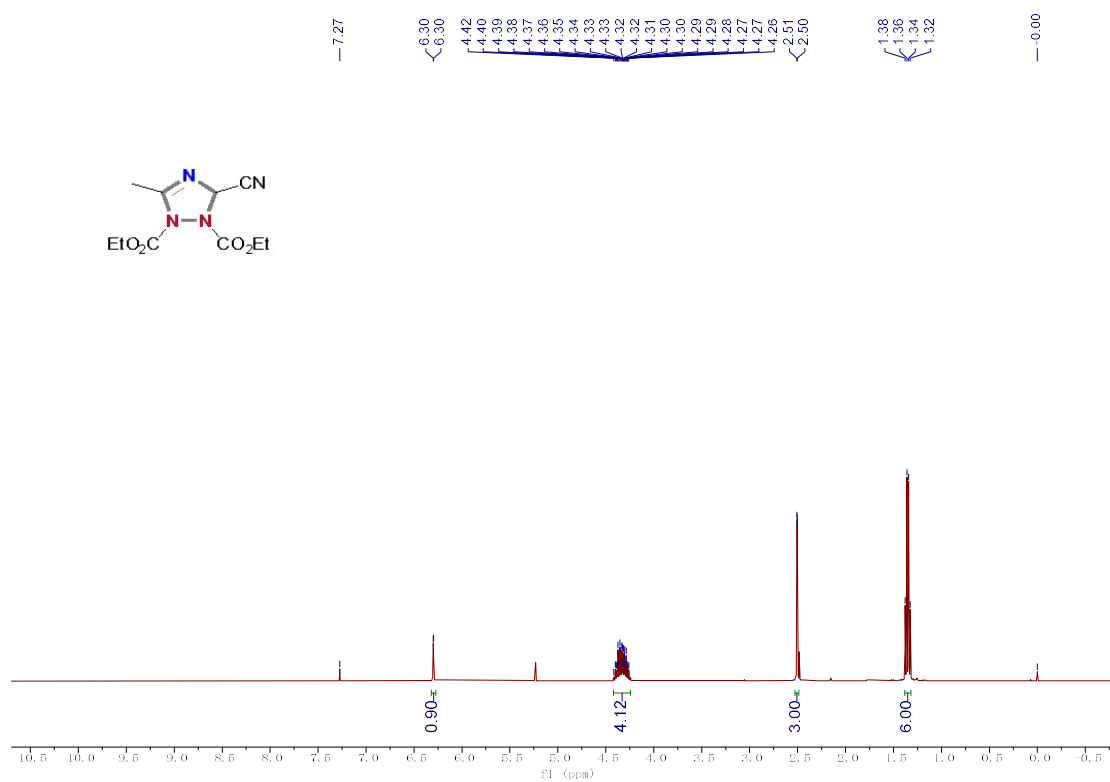

### <sup>13</sup>C NMR (100 MHz) Spectrum of 11b in CDCl<sub>3</sub>

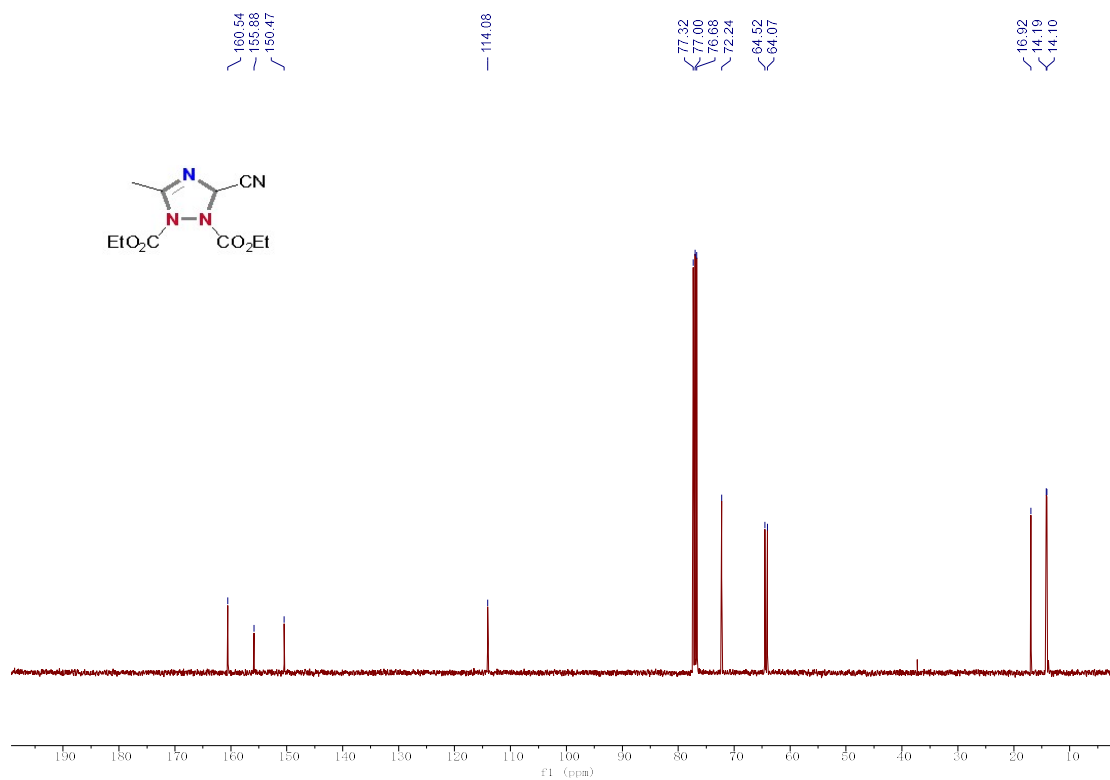

### <sup>1</sup>H NMR (400 MHz) Spectrum of 11c in CDCl<sub>3</sub>

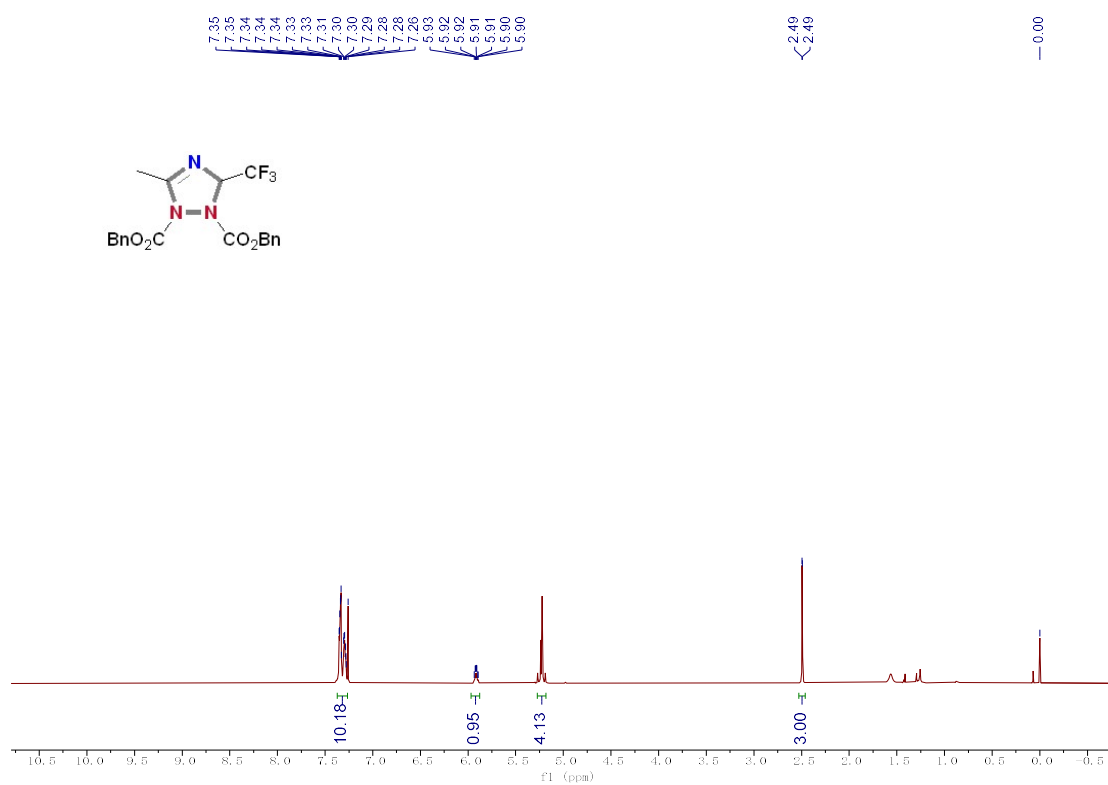

### <sup>13</sup>C NMR (100 MHz) Spectrum of 11c in CDCl<sub>3</sub>

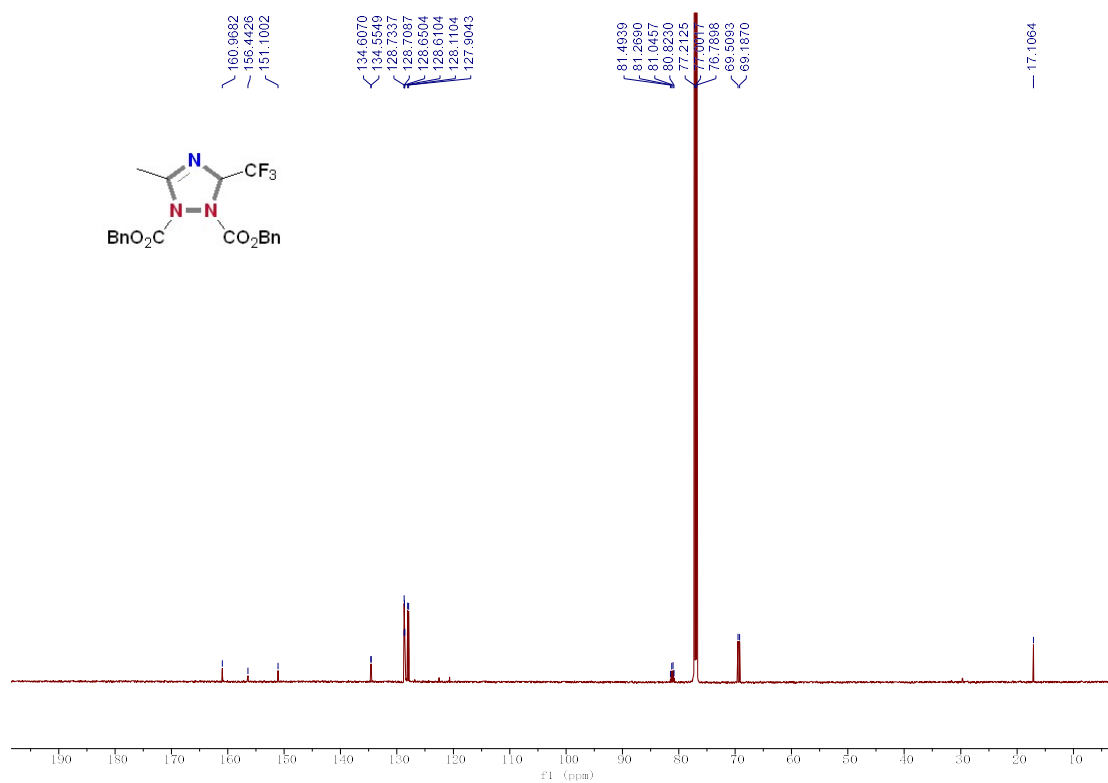



### <sup>1</sup>H NMR (400 MHz) Spectrum of 11d in CDCl<sub>3</sub>

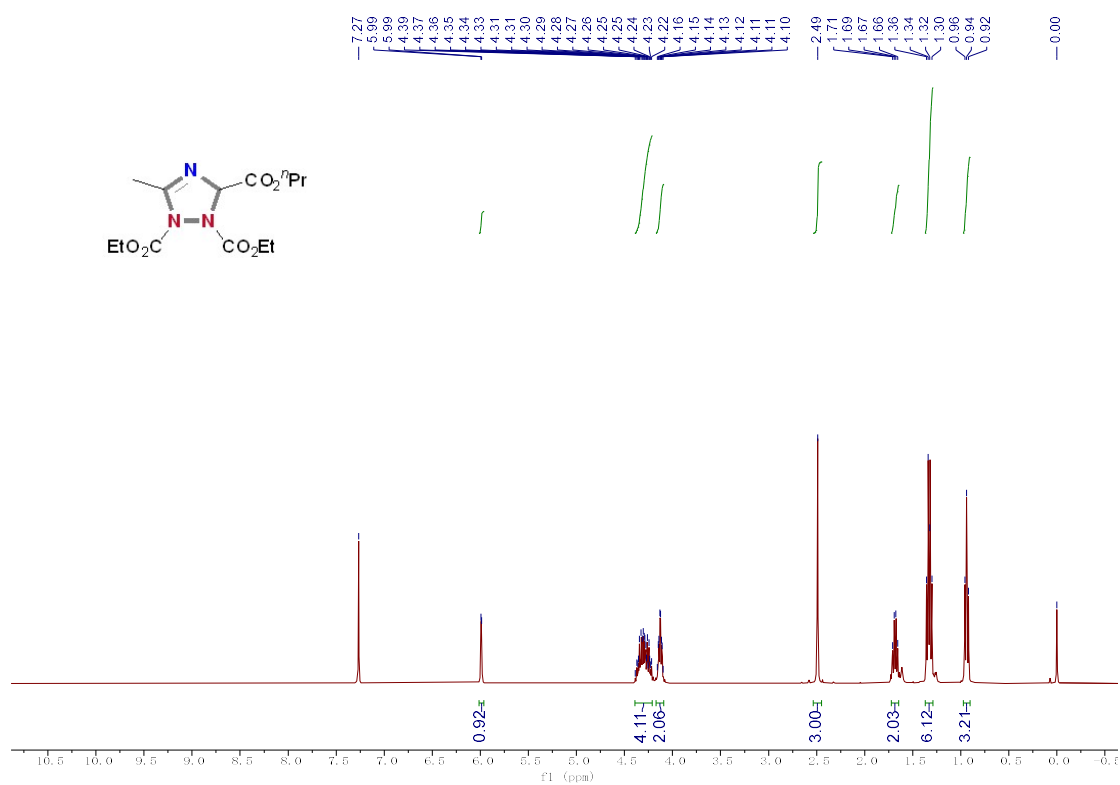

### <sup>13</sup>C NMR (100 MHz) Spectrum of 11d in CDCl<sub>3</sub>

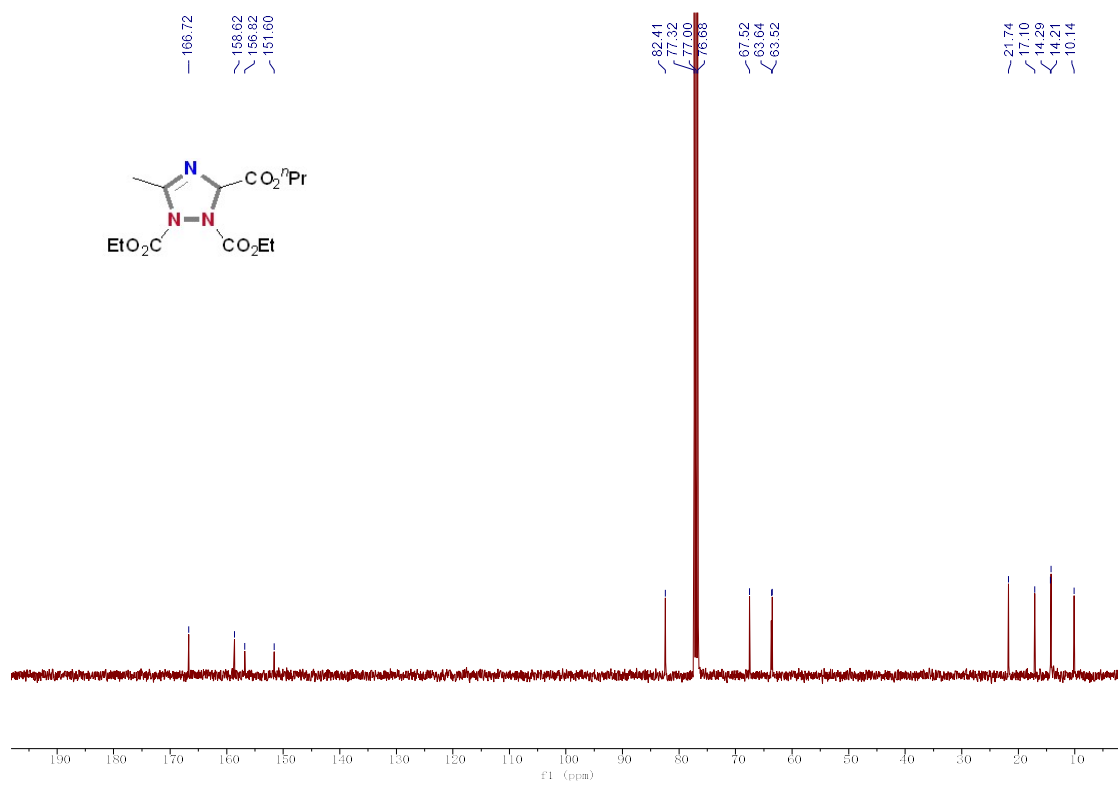

### <sup>1</sup>H NMR (400 MHz) Spectrum of 11e in CDCl<sub>3</sub>

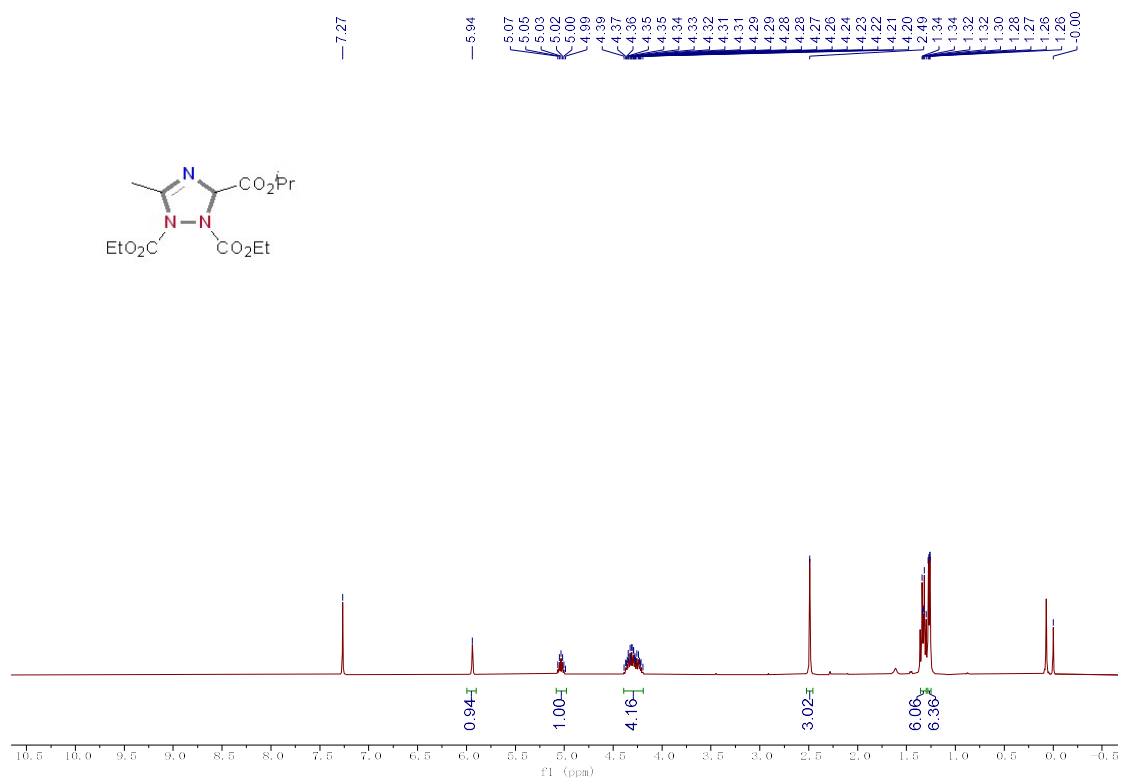

### <sup>13</sup>C NMR (100 MHz) Spectrum of 11e in CDCl<sub>3</sub>

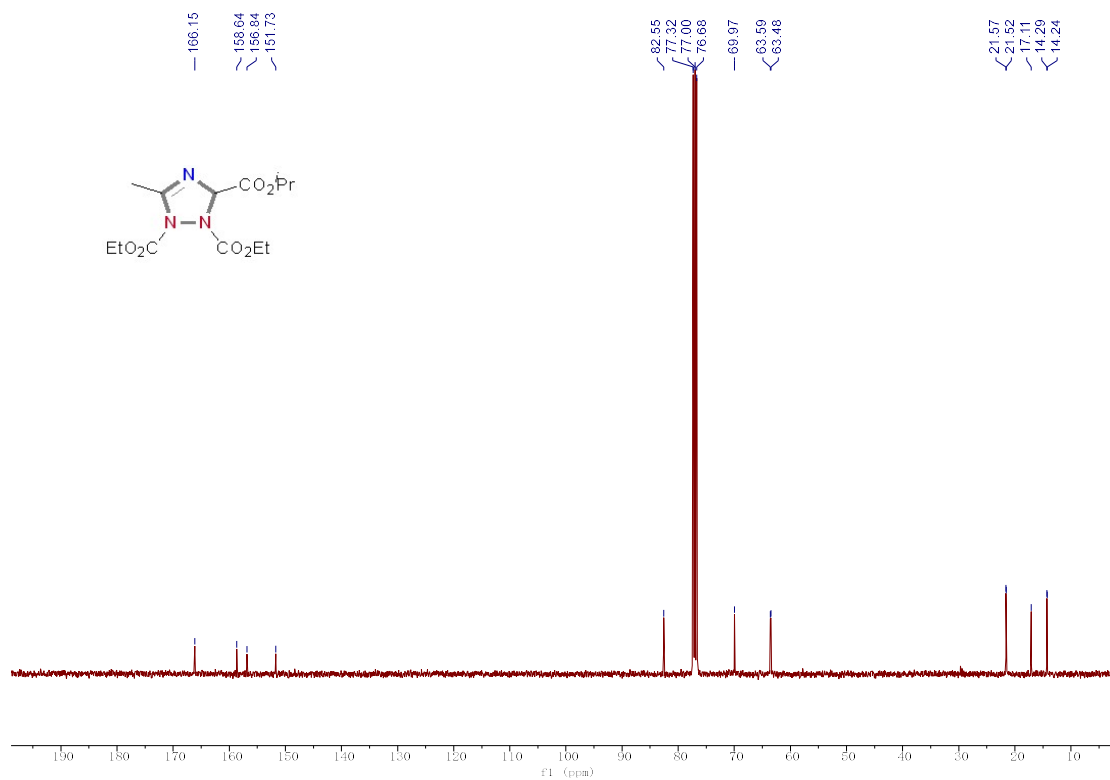

### <sup>1</sup>H NMR (400 MHz) Spectrum of 11f in CDCl<sub>3</sub>

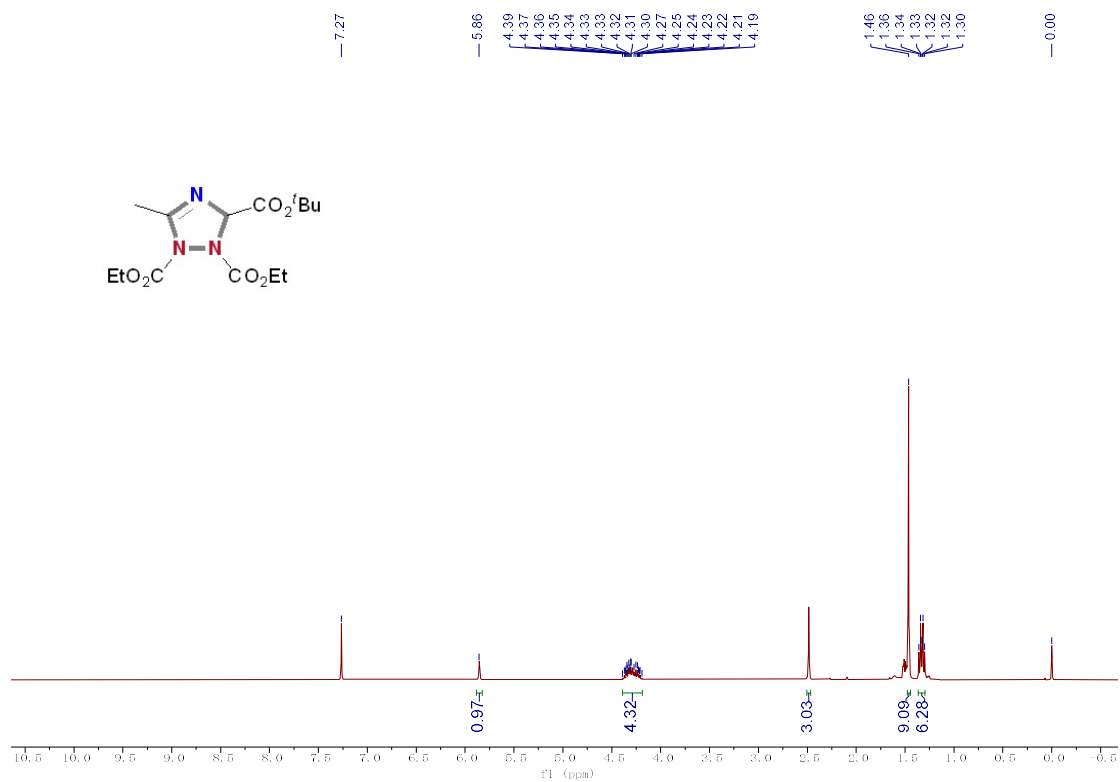

### <sup>13</sup>C NMR (100 MHz) Spectrum of 11f in CDCl<sub>3</sub>

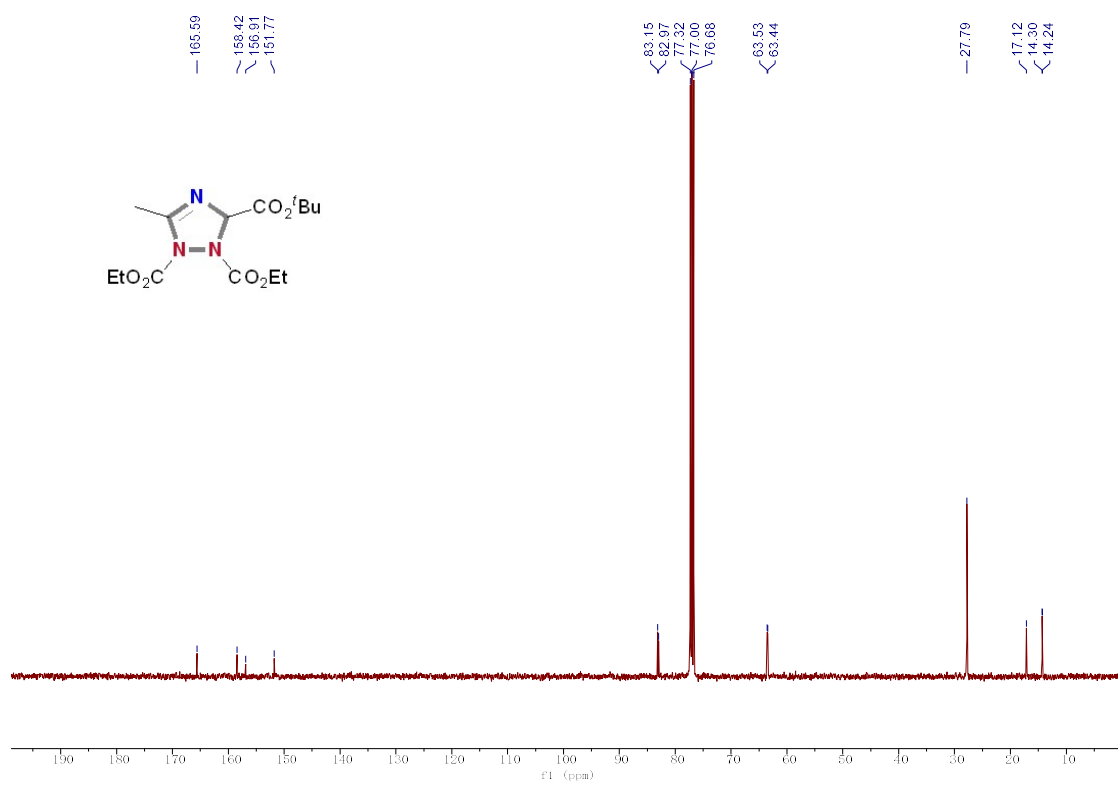

### <sup>1</sup>H NMR (400 MHz) Spectrum of 11g in CDCl<sub>3</sub>

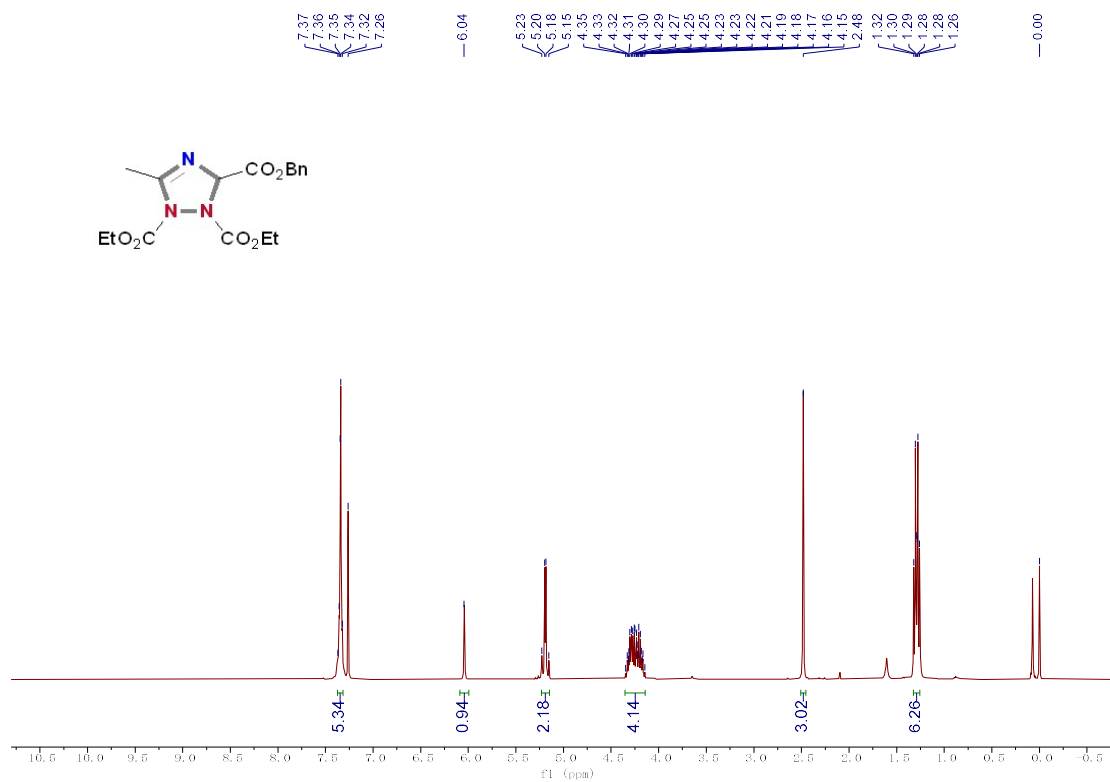

### <sup>13</sup>C NMR (100 MHz) Spectrum of 11g in CDCl<sub>3</sub>

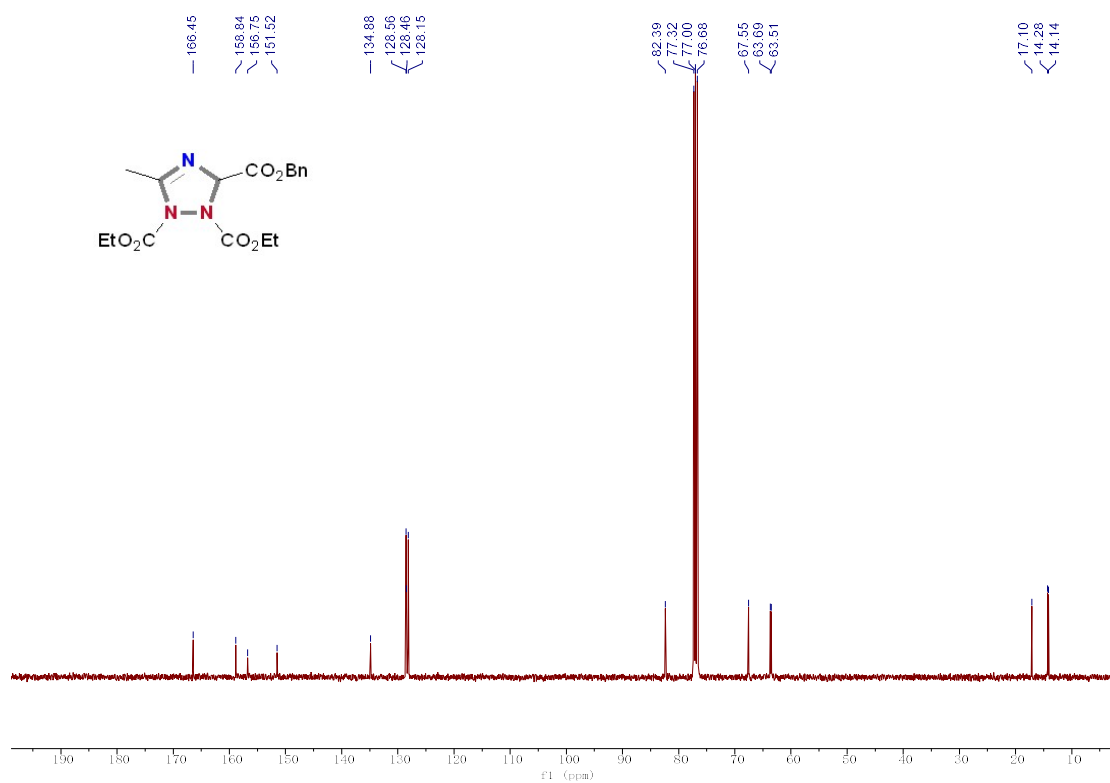

**<sup>1</sup>H NMR (400 MHz) Spectrum of 11h in CDCl<sub>3</sub>**

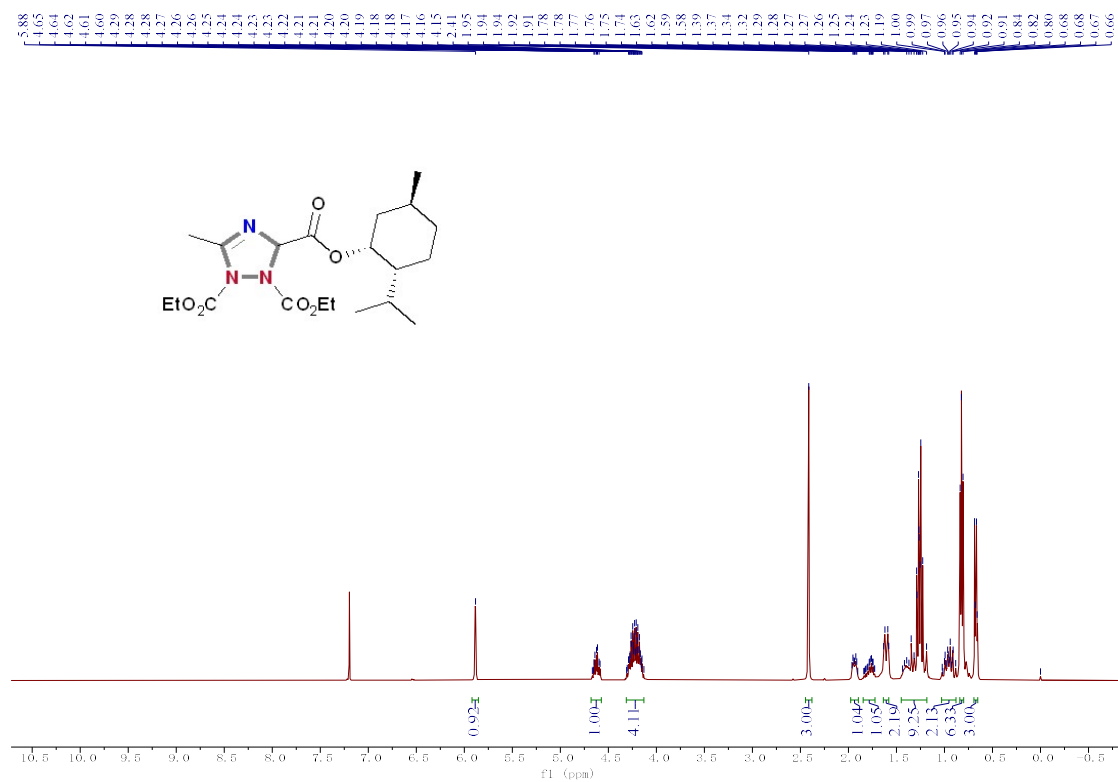

**<sup>13</sup>CNMR (100 MHz) Spectrum of 11h in CDCl<sub>3</sub>**

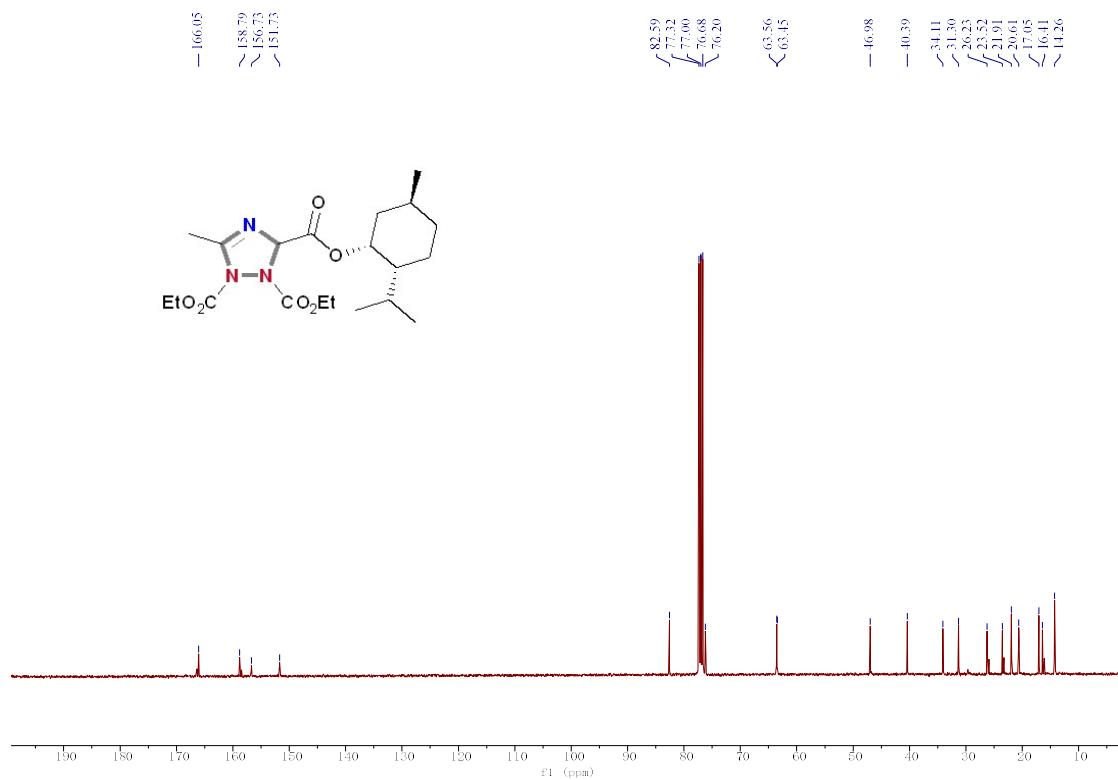

### <sup>1</sup>H NMR (400 MHz) Spectrum of 11i in CDCl<sub>3</sub>

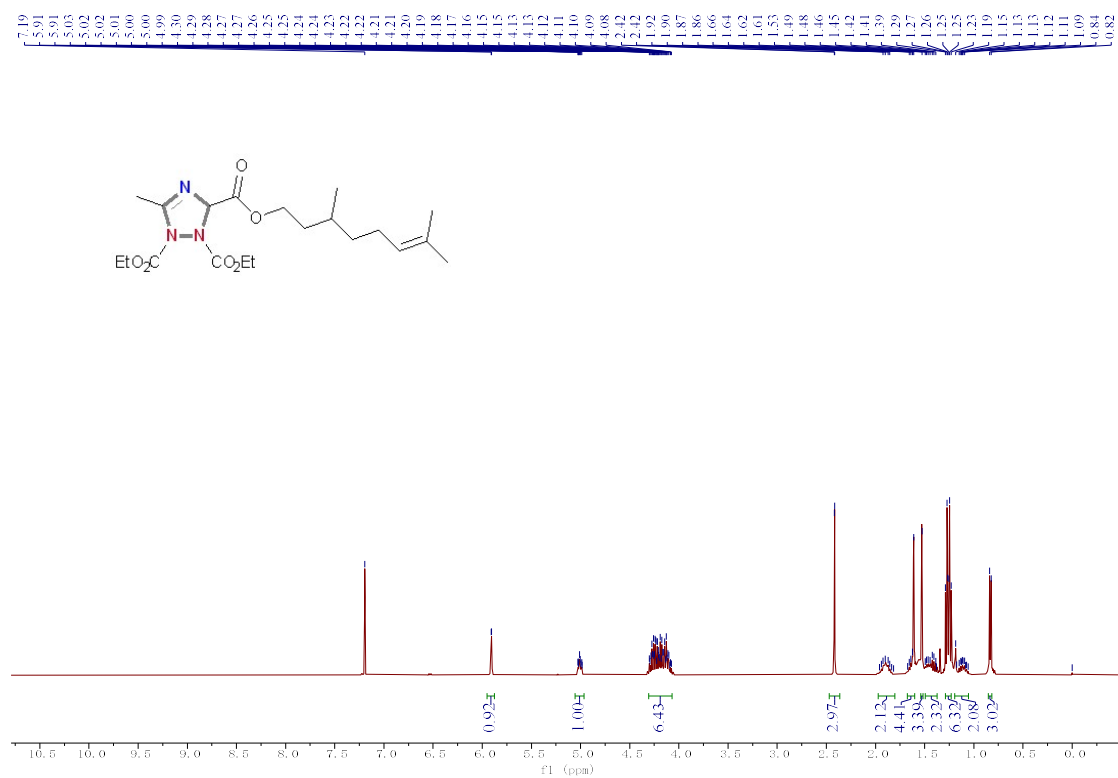

### <sup>13</sup>CNMR (100 MHz) Spectrum of 11i in CDCl<sub>3</sub>

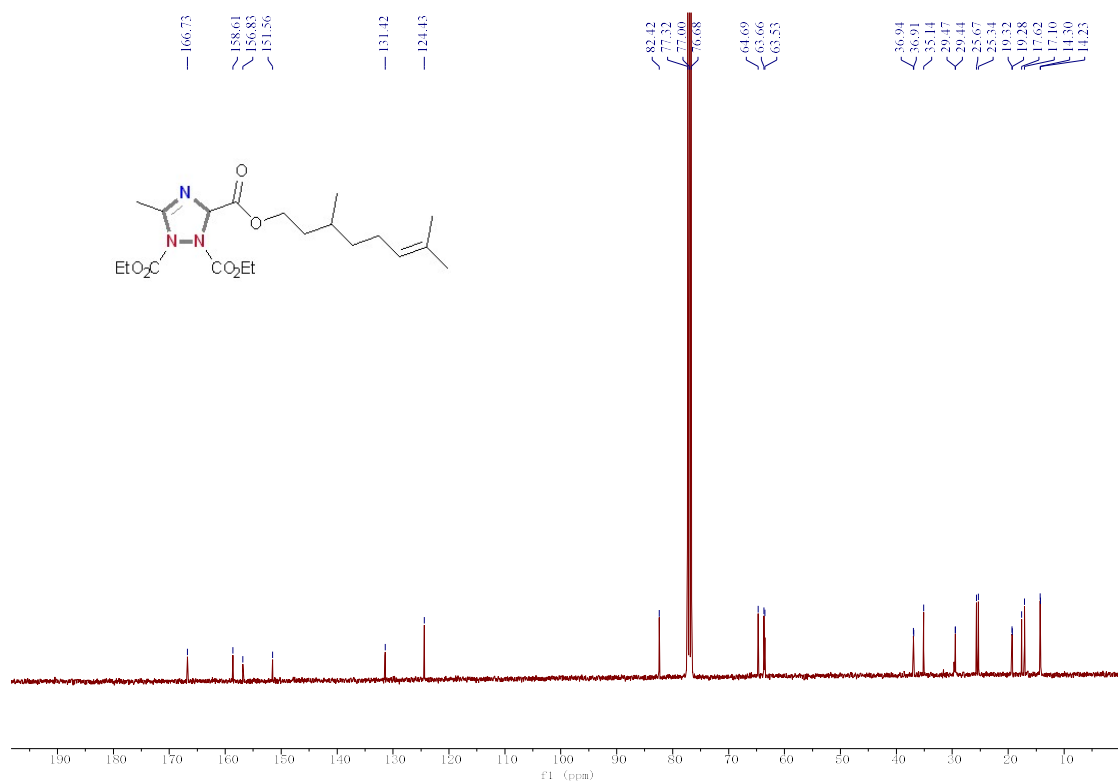



**<sup>1</sup>H NMR (400 MHz) Spectrum of 11k in CDCl<sub>3</sub>**

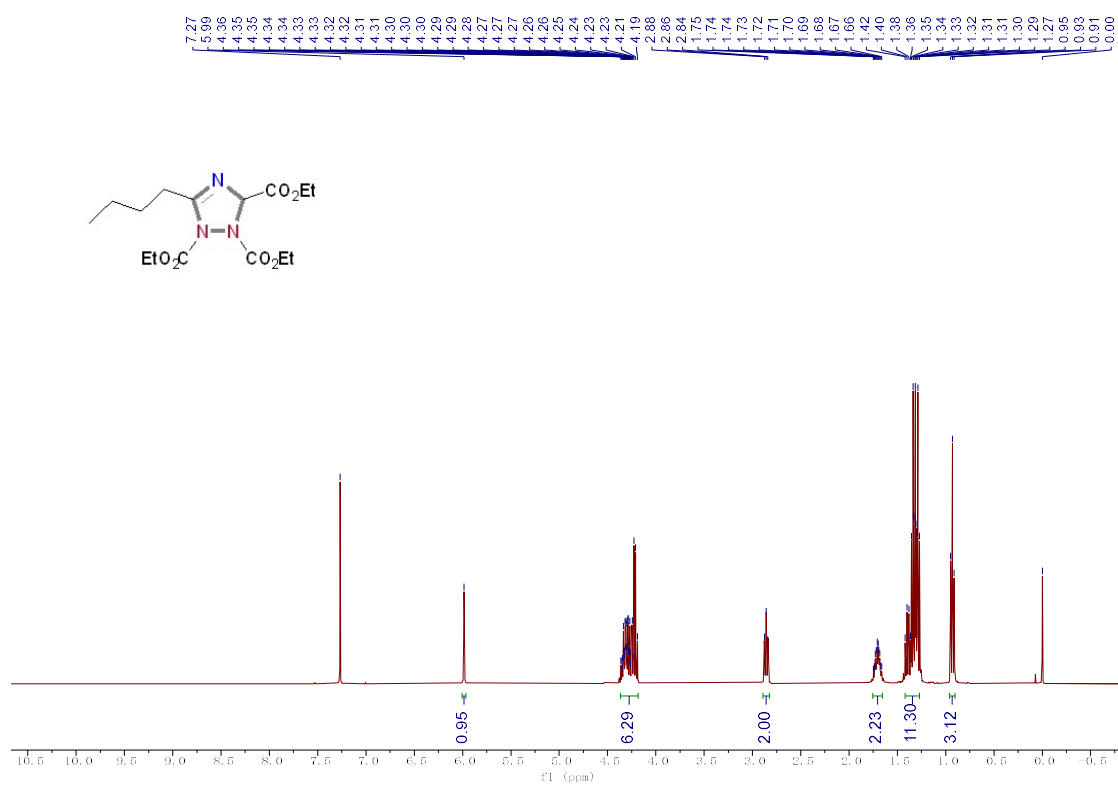

**<sup>13</sup>CNMR (100 MHz) Spectrum of 11k in CDCl<sub>3</sub>**

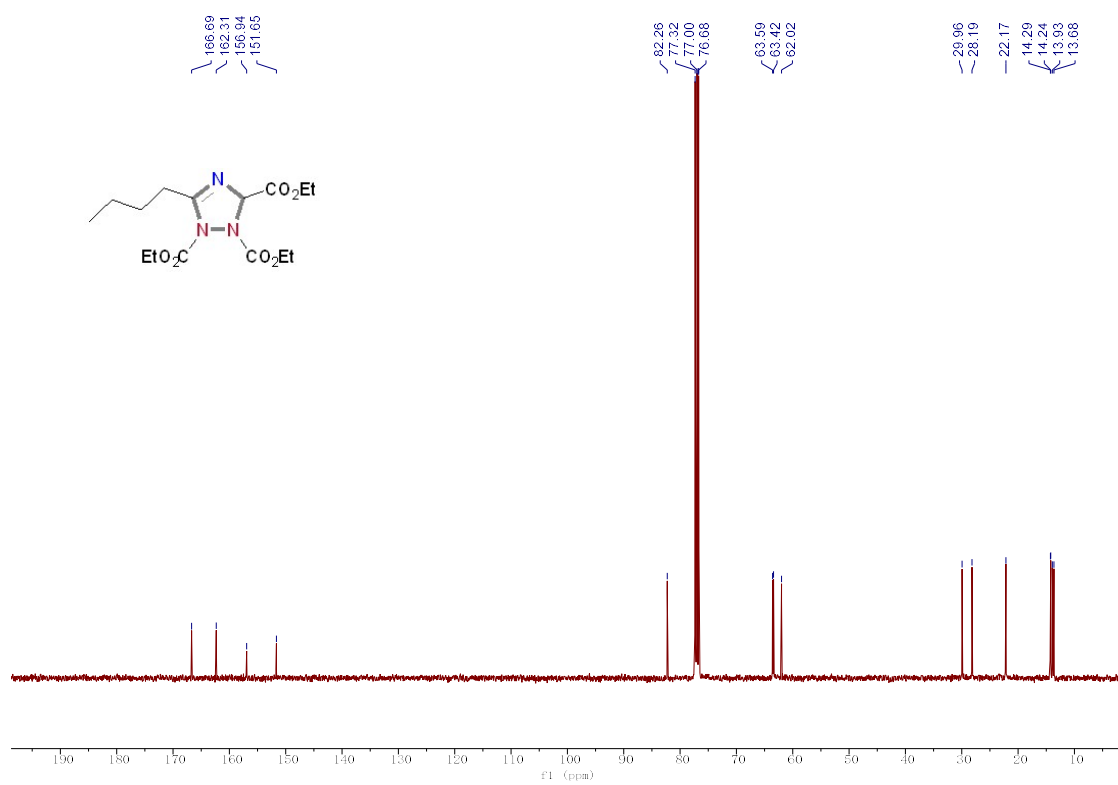



### <sup>1</sup>H NMR (400 MHz) Spectrum of 111 in CDCl<sub>3</sub>

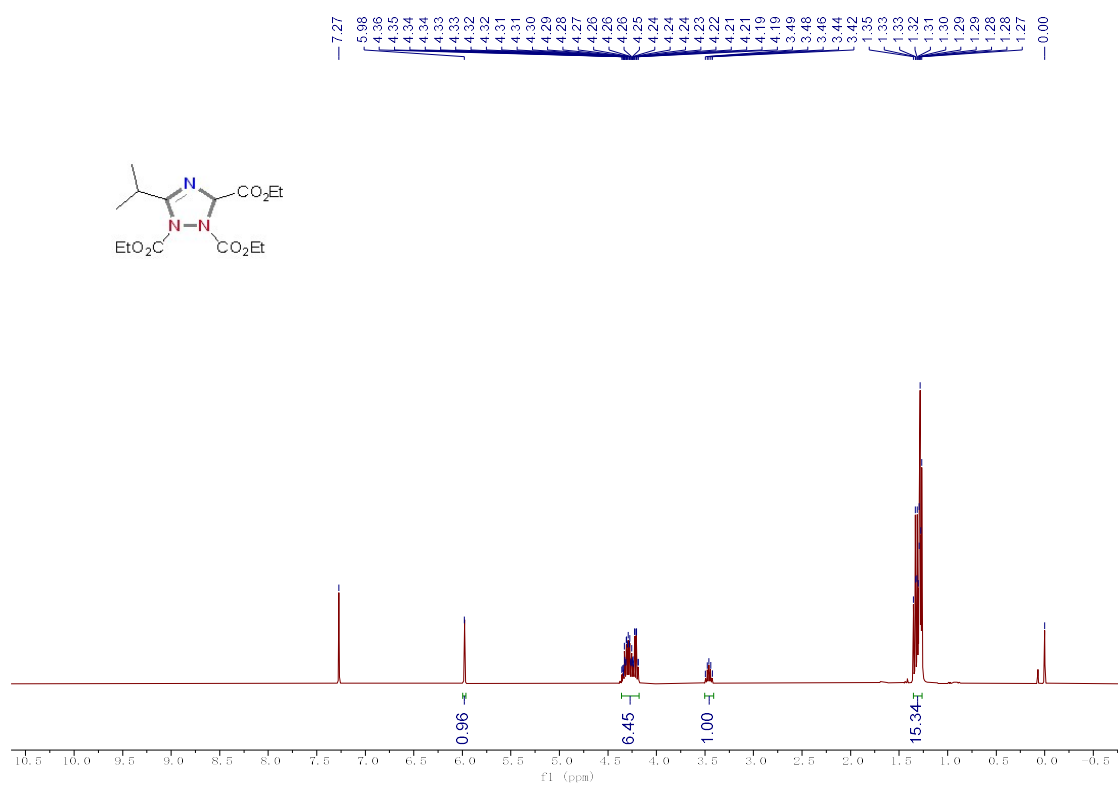

### <sup>13</sup>C NMR (100 MHz) Spectrum of 111 in CDCl<sub>3</sub>

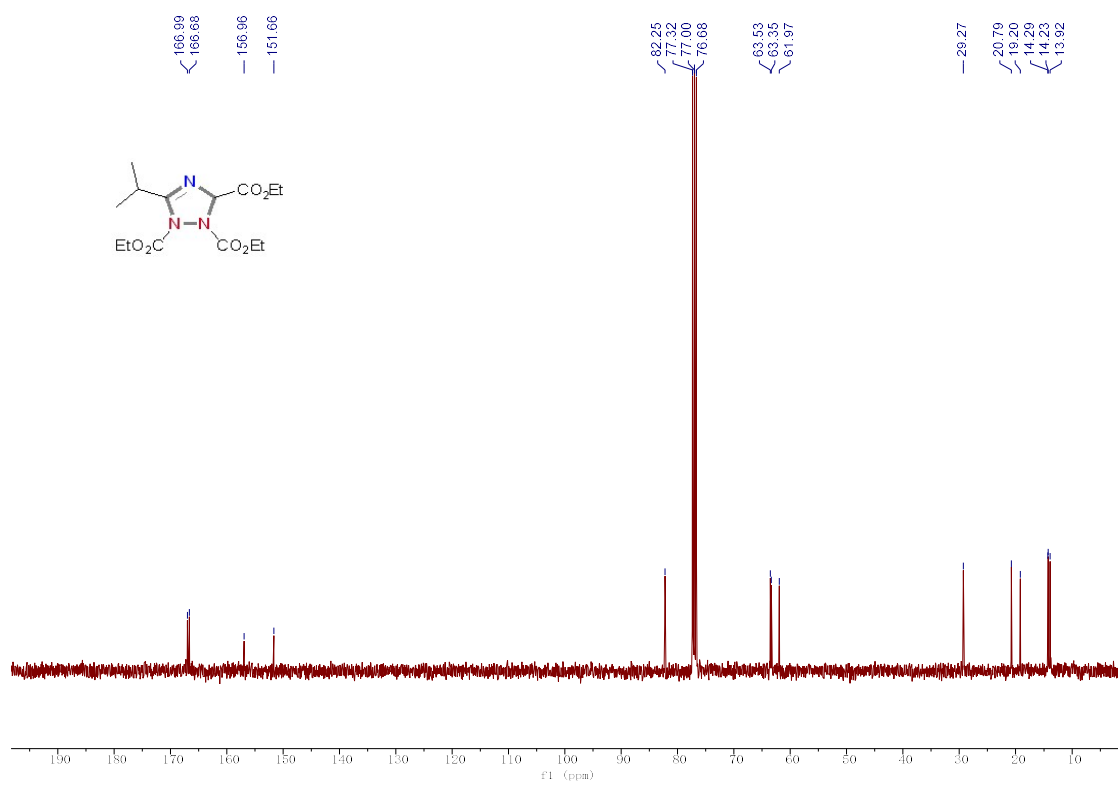

### <sup>1</sup>H NMR (400 MHz) Spectrum of 11m in CDCl<sub>3</sub>

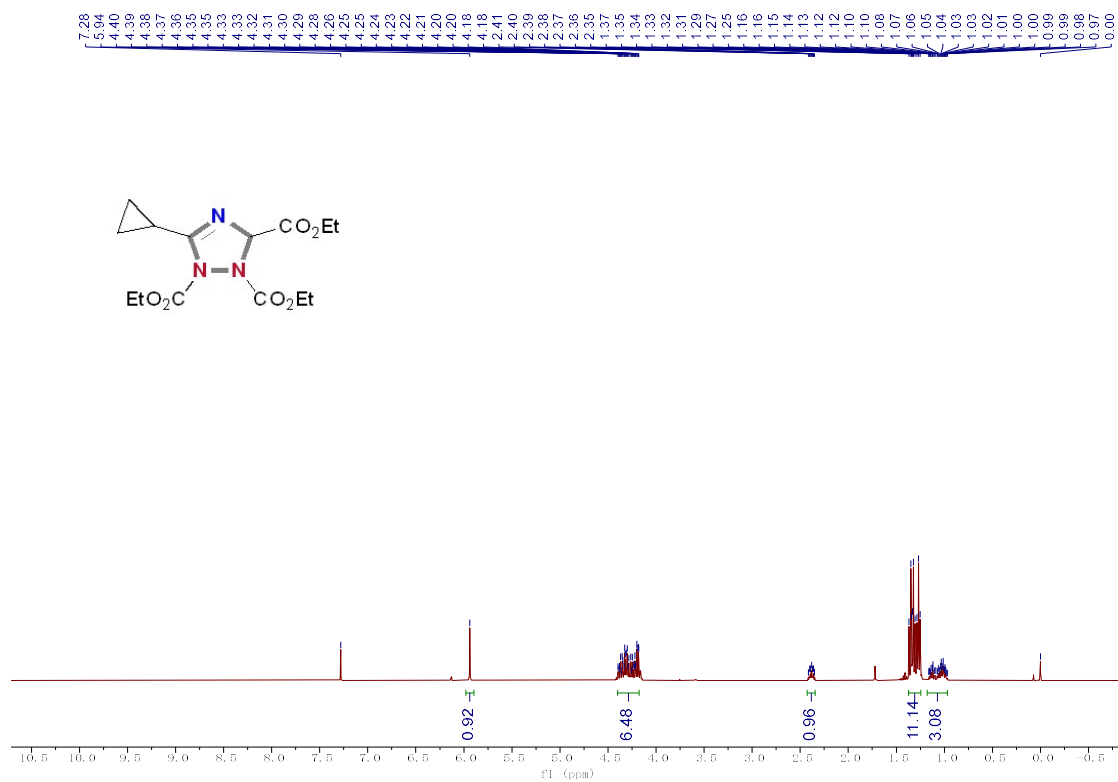

### <sup>13</sup>CNMR (100 MHz) Spectrum of 11m in CDCl<sub>3</sub>

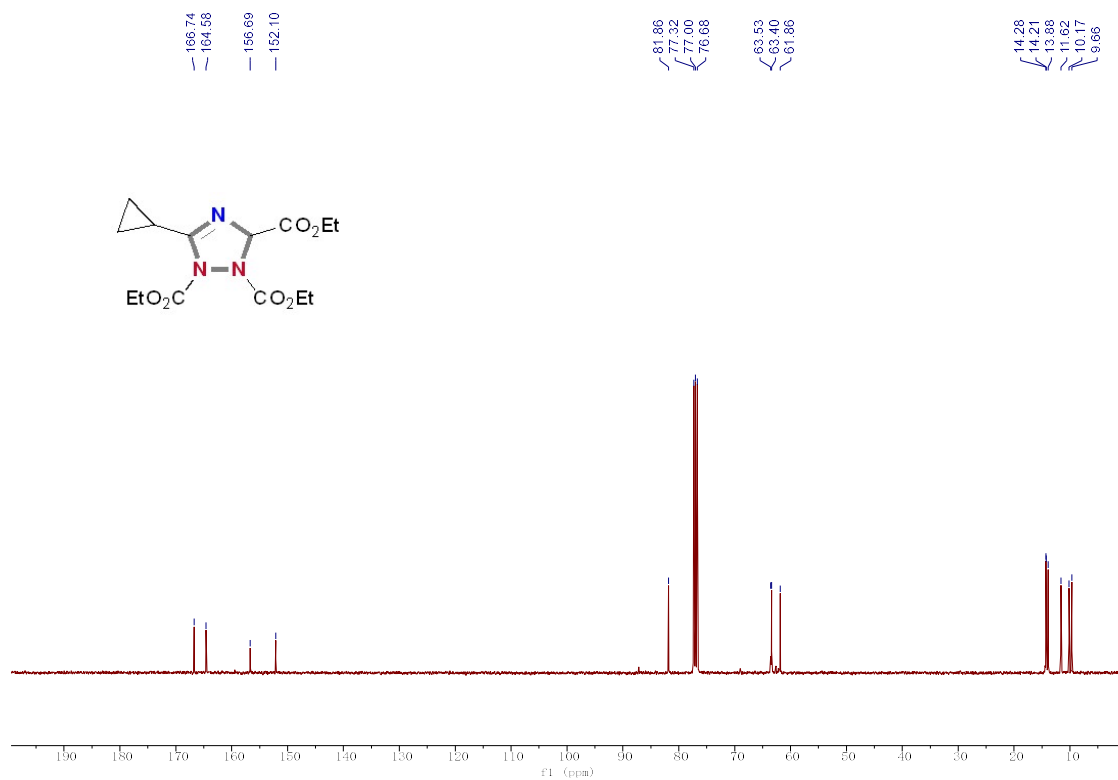

### <sup>1</sup>H NMR (400 MHz) Spectrum of 11n in CDCl<sub>3</sub>

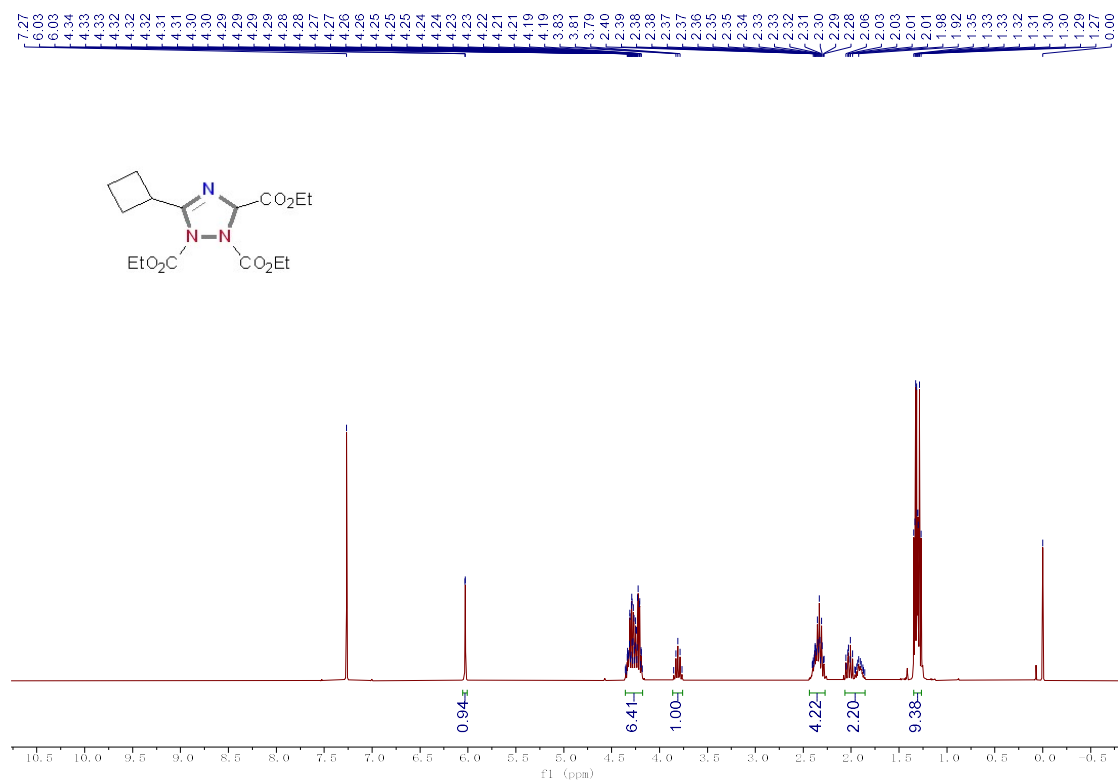

### <sup>13</sup>CNMR (100 MHz) Spectrum of 11n in CDCl<sub>3</sub>

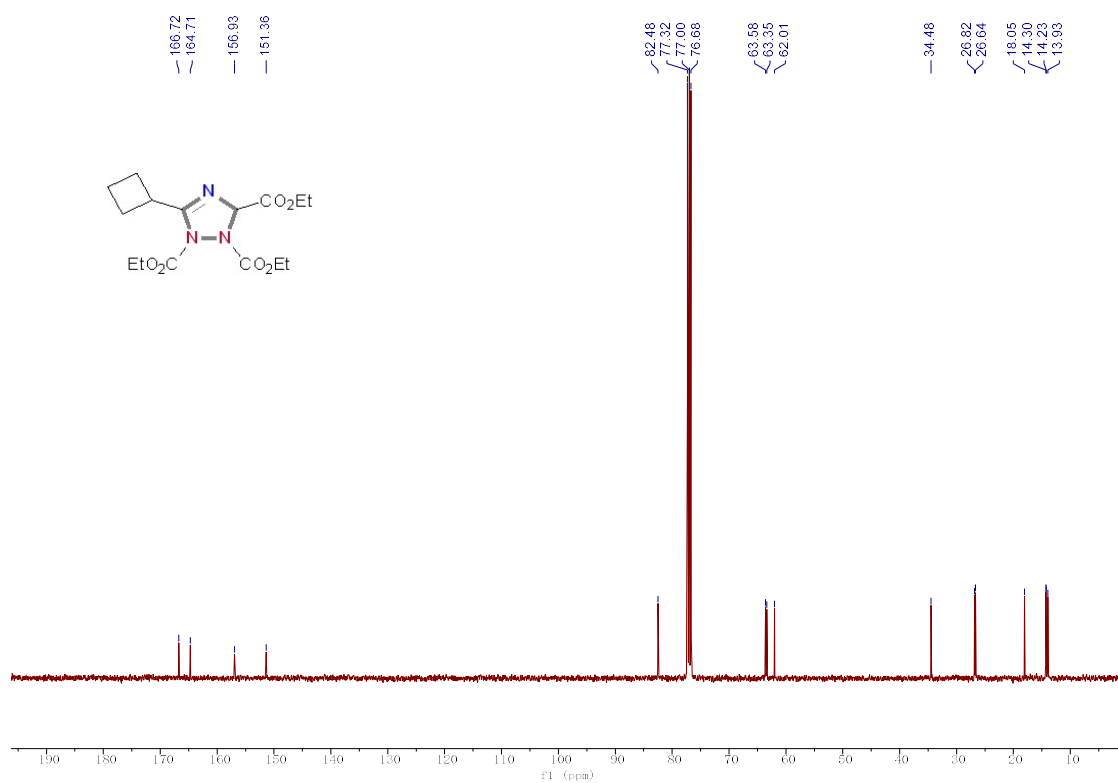

### <sup>1</sup>H NMR (400 MHz) Spectrum of 11o in CDCl<sub>3</sub>

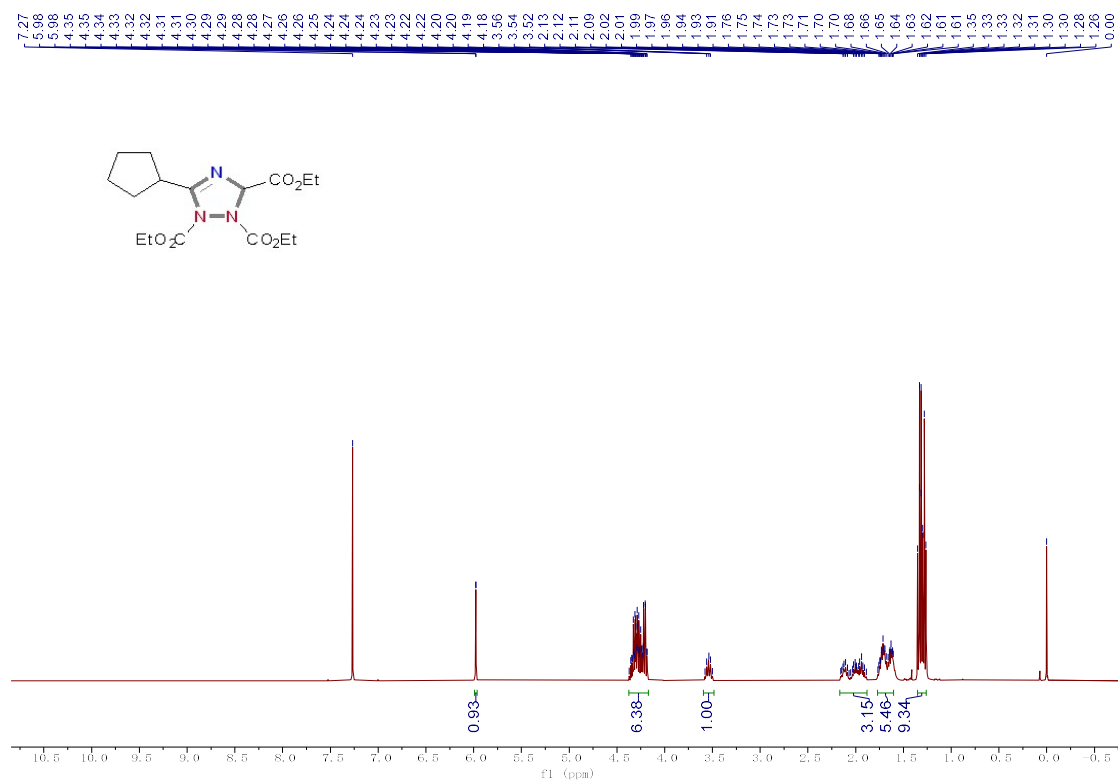

### <sup>13</sup>CNMR (100 MHz) Spectrum of 11o in CDCl<sub>3</sub>

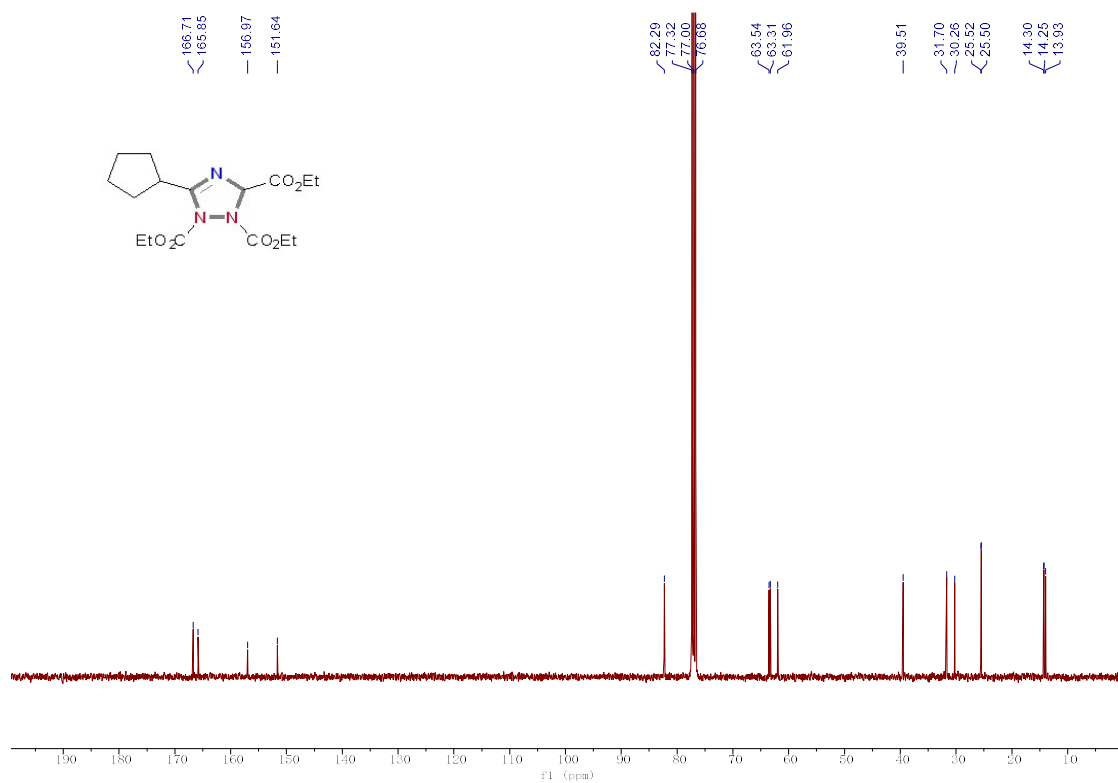

### <sup>1</sup>H NMR (400 MHz) Spectrum of 11p in CDCl<sub>3</sub>

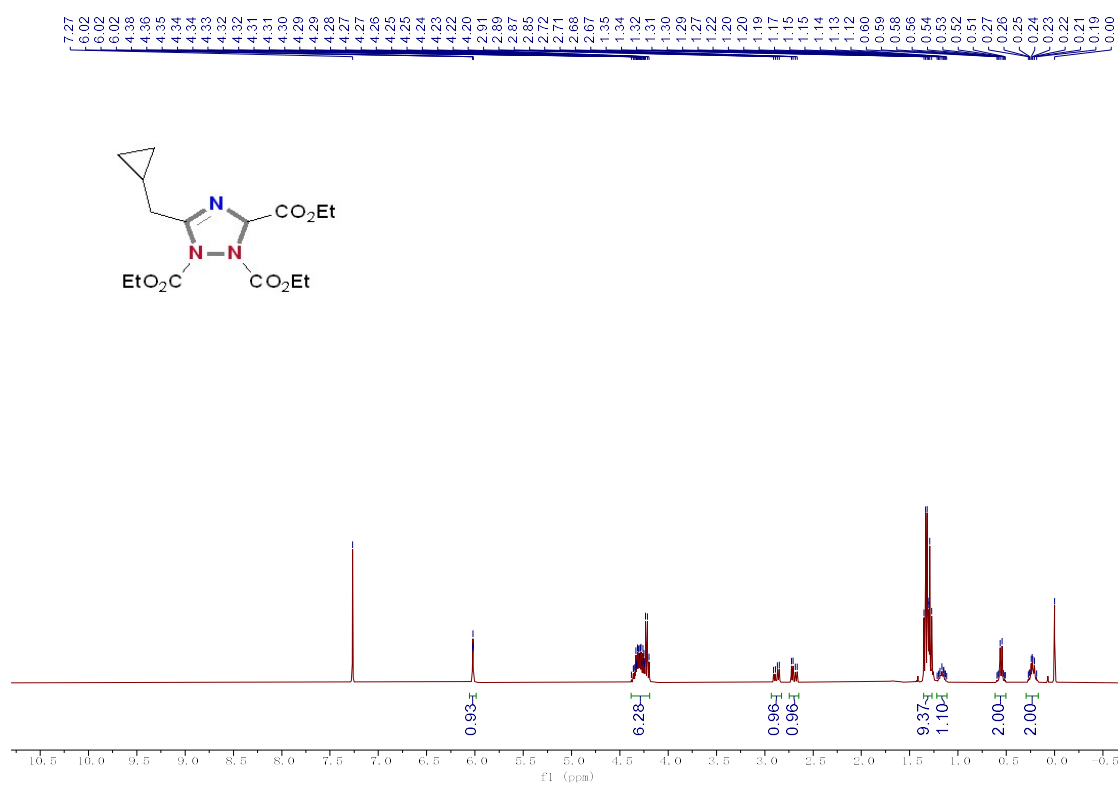

### <sup>13</sup>C NMR (100 MHz) Spectrum of 11p in CDCl<sub>3</sub>

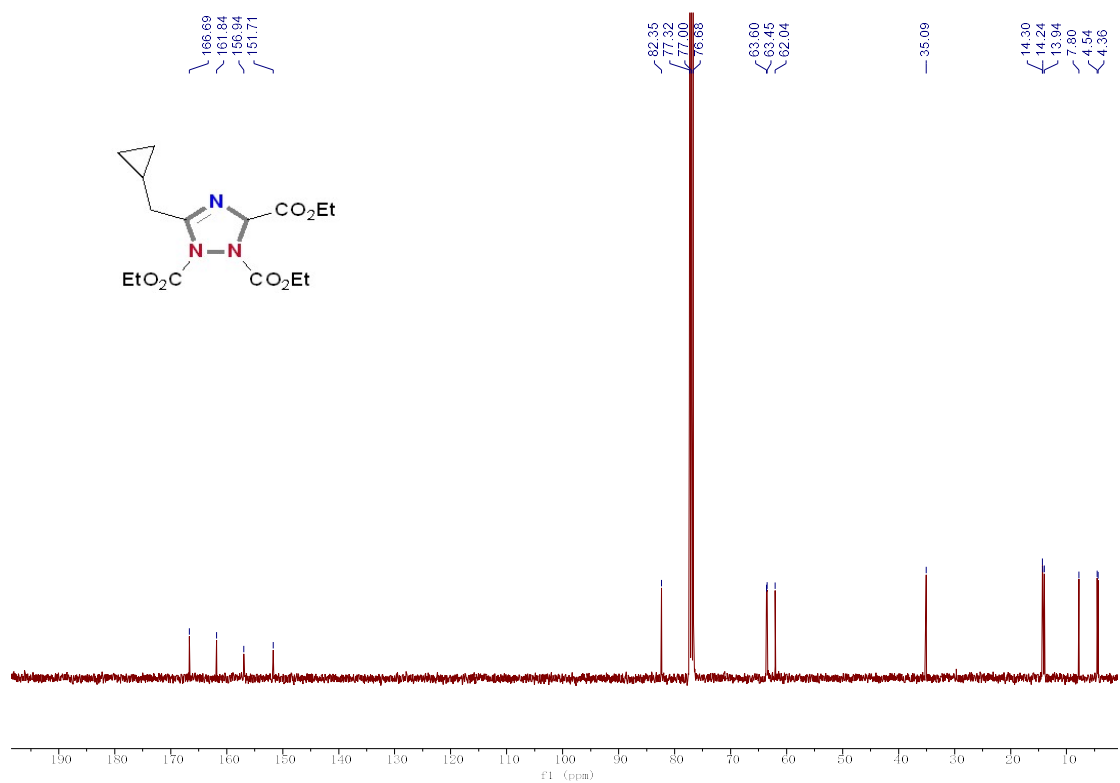

### <sup>1</sup>H NMR (400 MHz) Spectrum of 11q in CDCl<sub>3</sub>

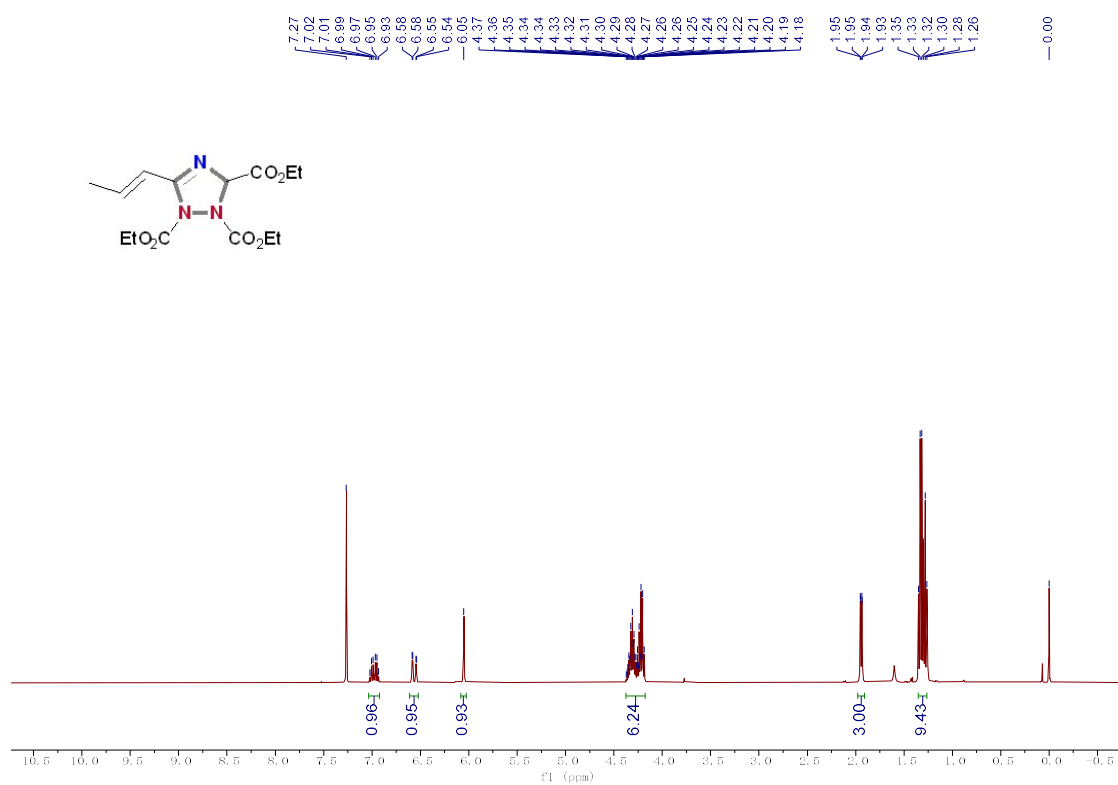

### <sup>13</sup>C NMR (100 MHz) Spectrum of 11q in CDCl<sub>3</sub>

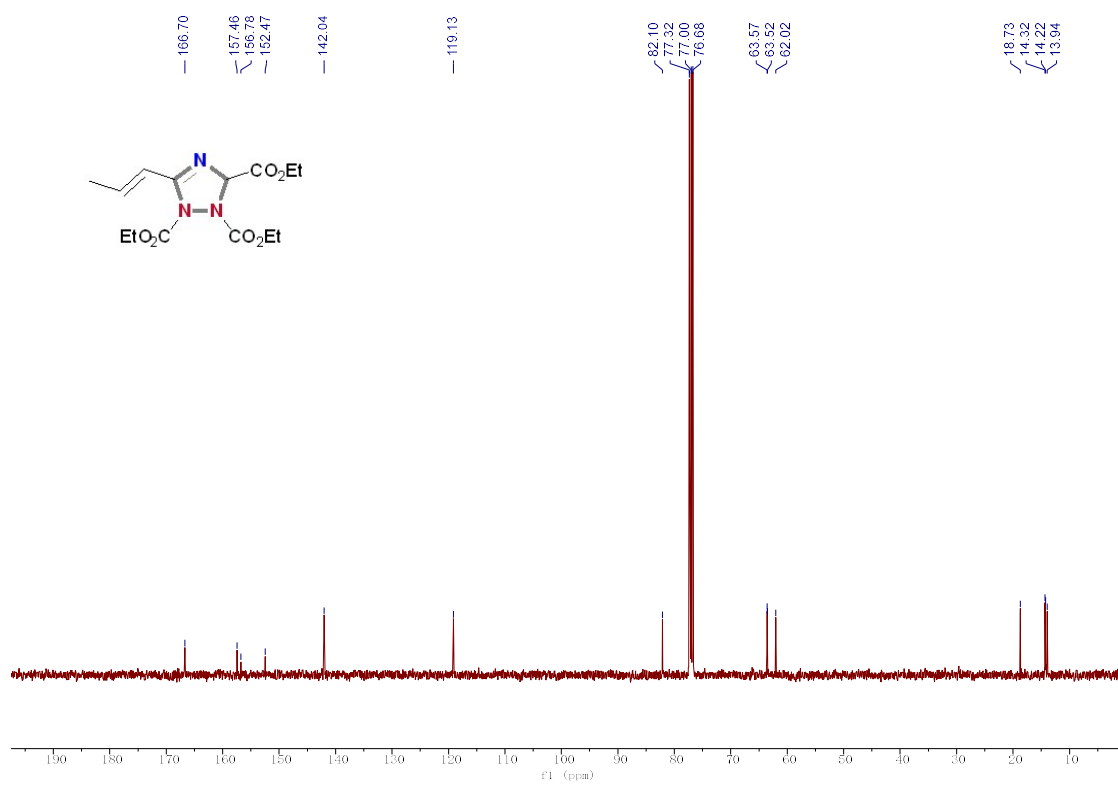

### <sup>1</sup>H NMR (400 MHz) Spectrum of 11r in CDCl<sub>3</sub>

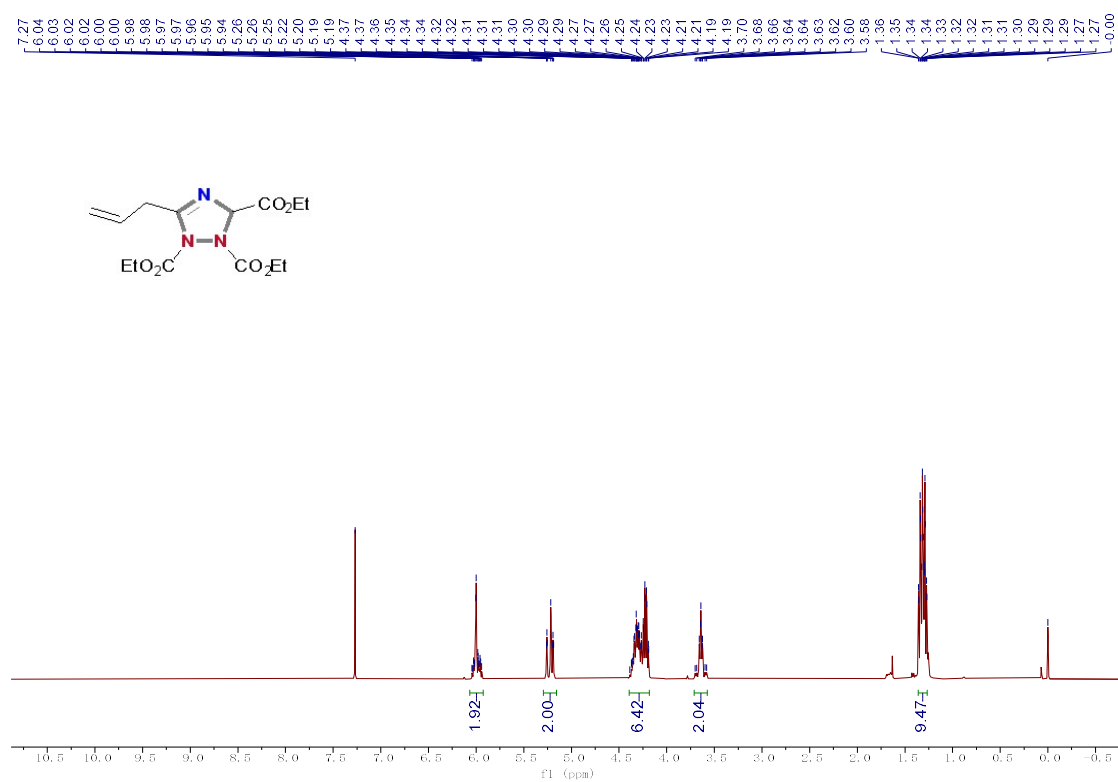

### <sup>13</sup>CNMR (100 MHz) Spectrum of 11r in CDCl<sub>3</sub>

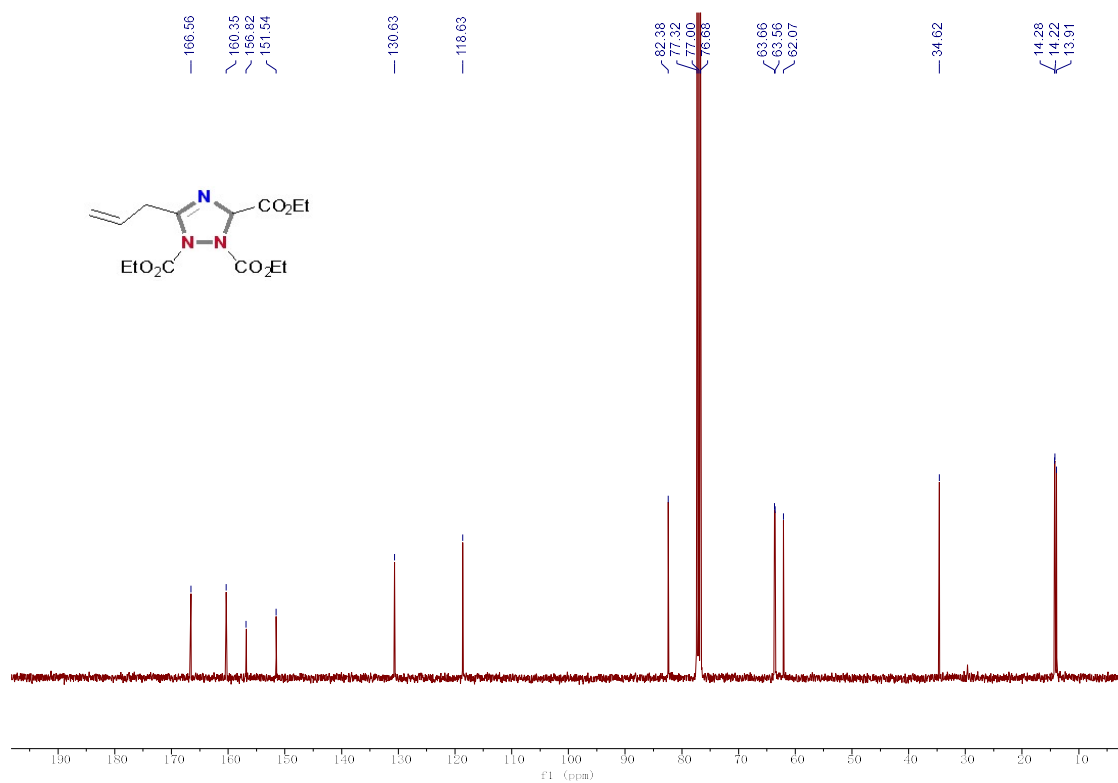

### <sup>1</sup>H NMR (400 MHz) Spectrum of 11s in CDCl<sub>3</sub>

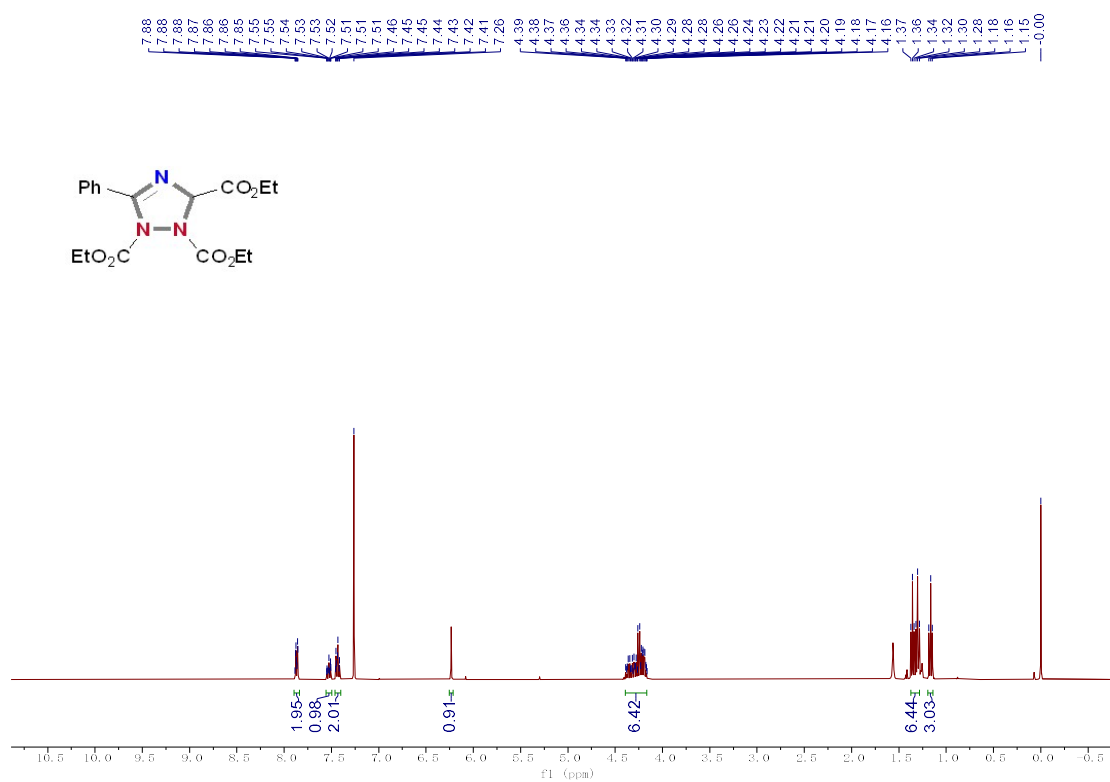

### <sup>13</sup>CNMR (100 MHz) Spectrum of 11s in CDCl<sub>3</sub>

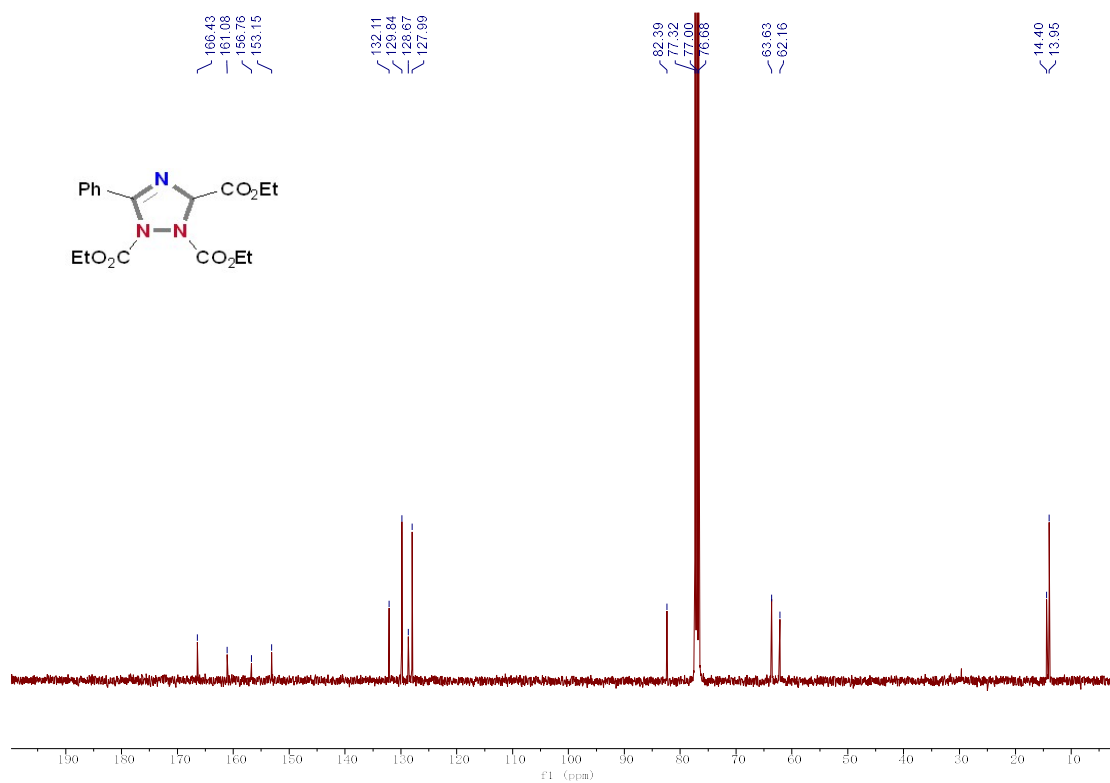



### $^1\text{H}$ NMR (400 MHz) Spectrum of 11t in $\text{CDCl}_3$

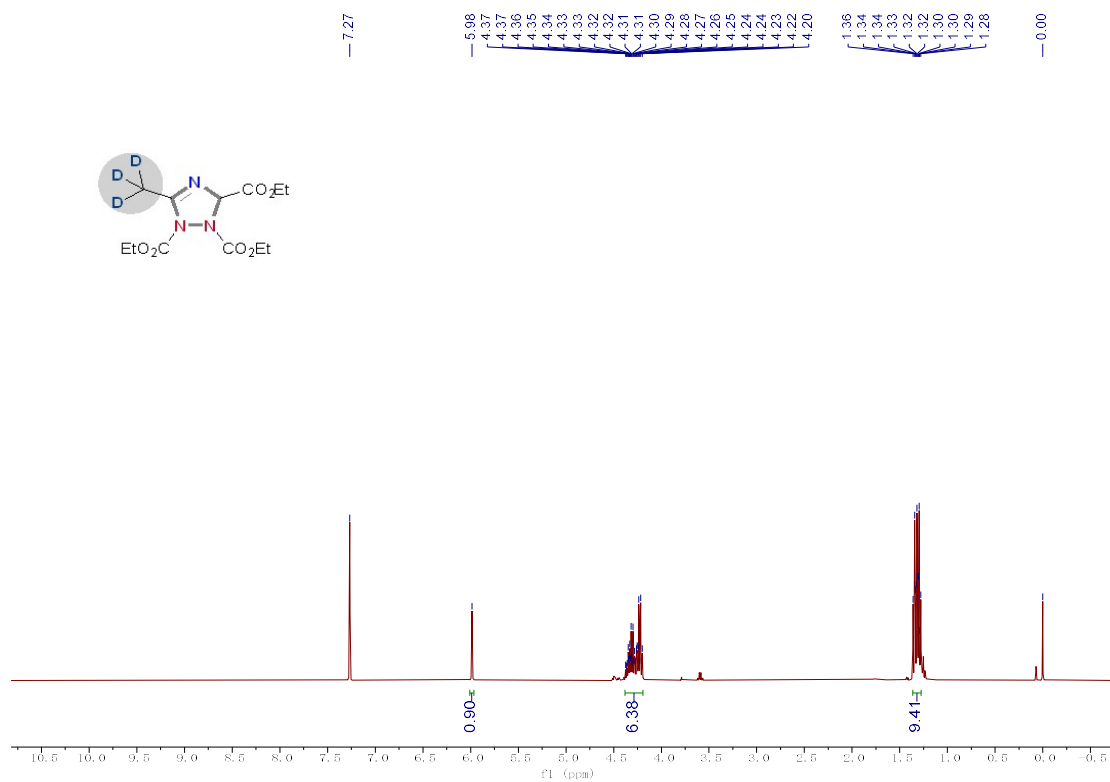

### $^{13}\text{C}$ NMR (100 MHz) Spectrum of 11t in $\text{CDCl}_3$

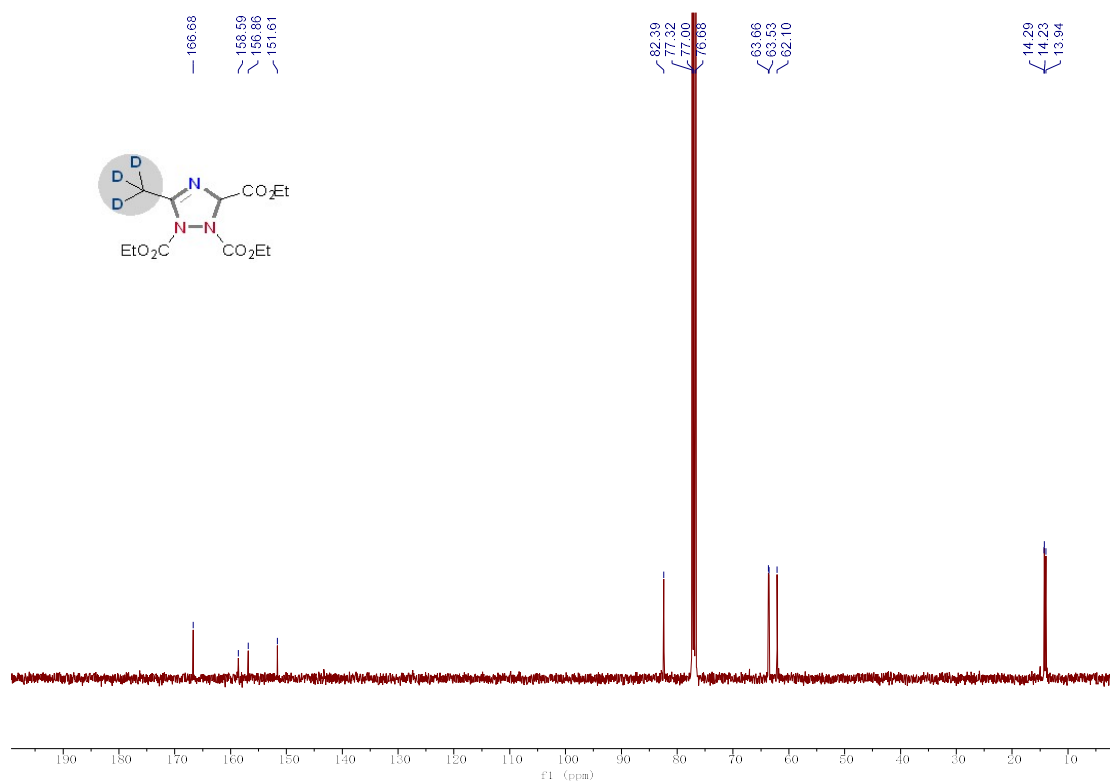

### <sup>1</sup>H NMR (400 MHz) Spectrum of 11u in CDCl<sub>3</sub>

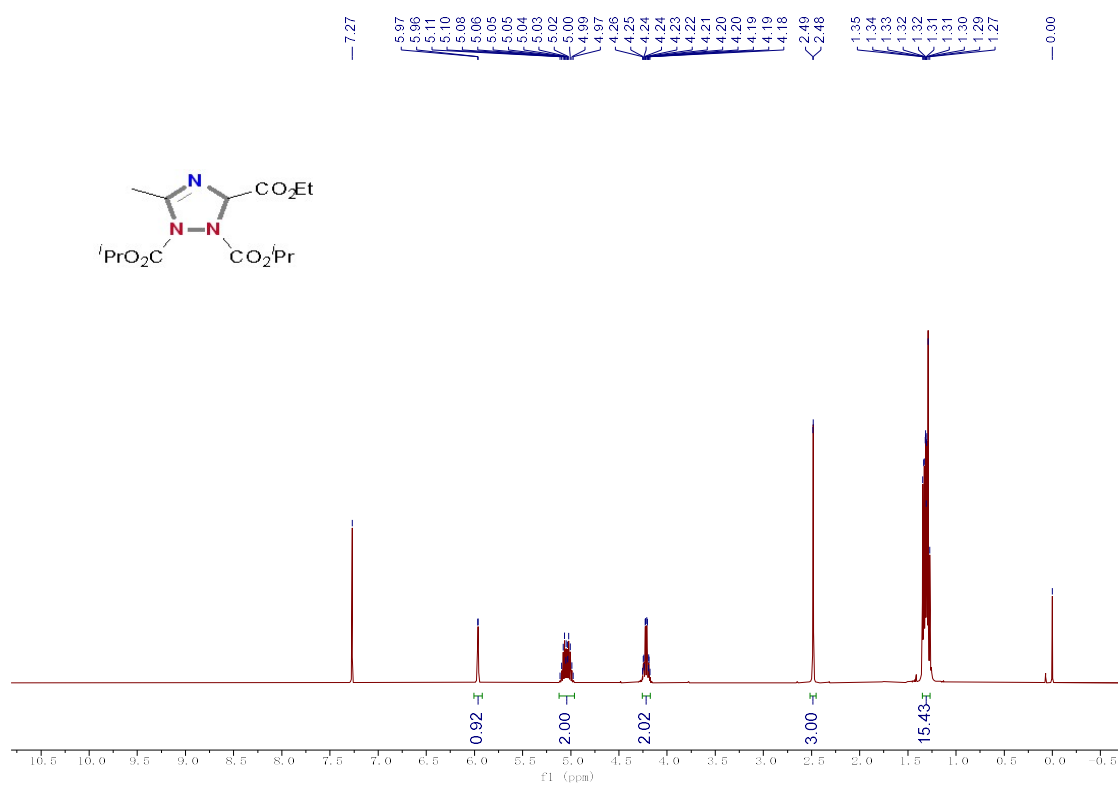

### <sup>13</sup>C NMR (100 MHz) Spectrum of 11u in CDCl<sub>3</sub>

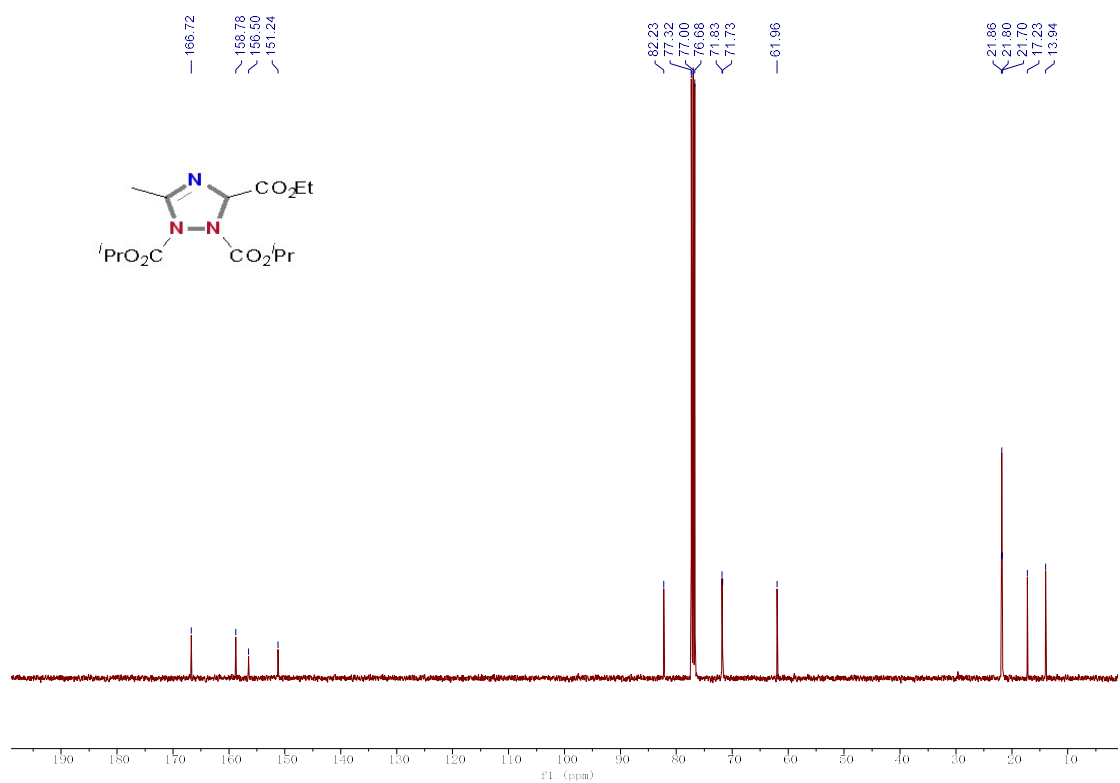

### <sup>1</sup>H NMR (400 MHz) Spectrum of 11v in CDCl<sub>3</sub>

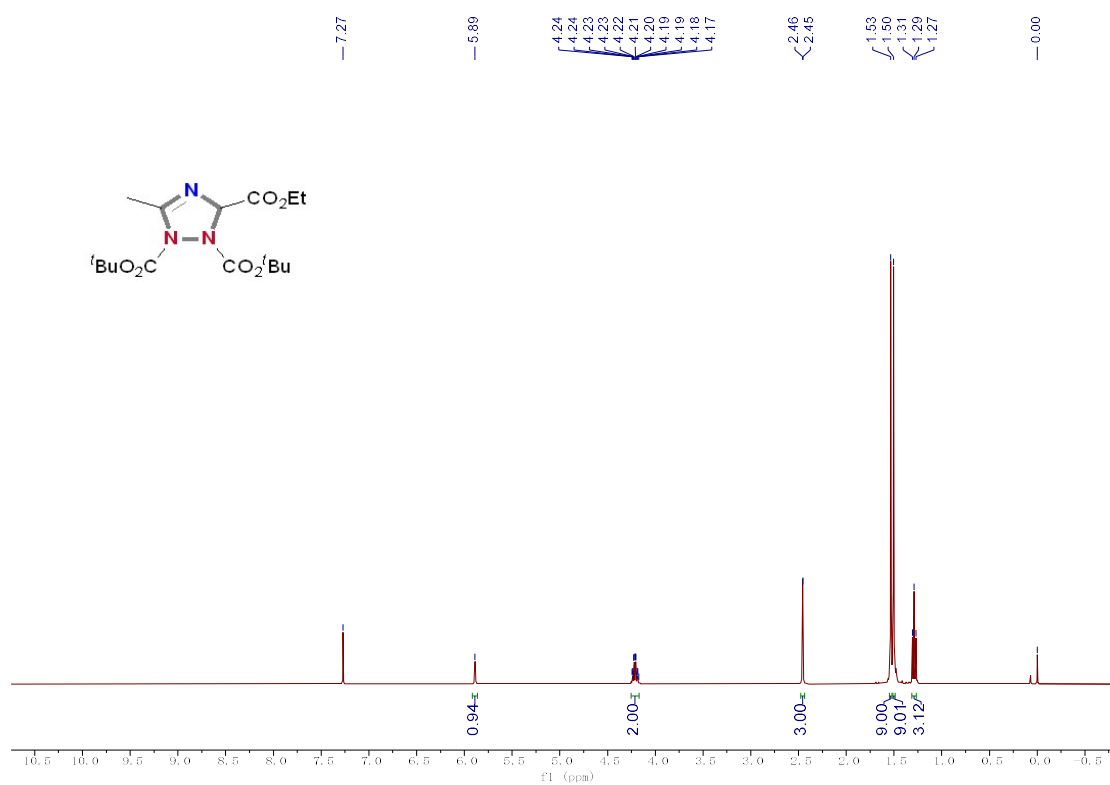

### <sup>13</sup>CNMR (100 MHz) Spectrum of 11v in CDCl<sub>3</sub>

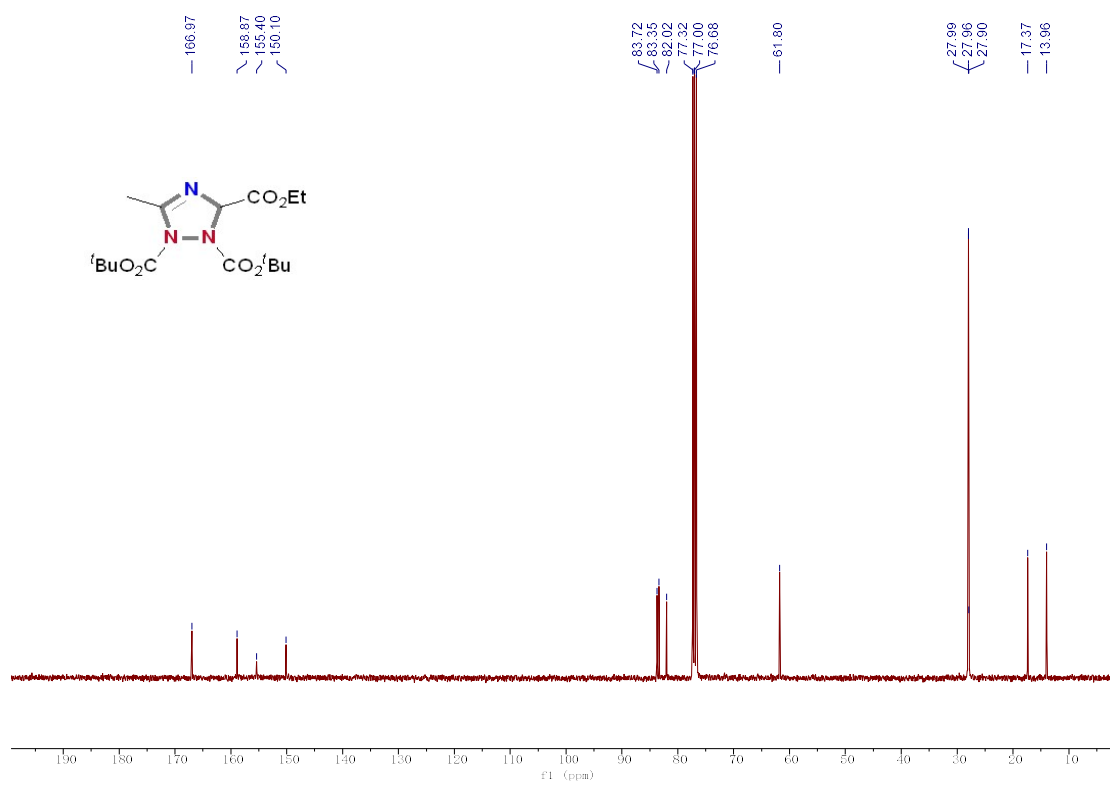

### <sup>1</sup>H NMR (400 MHz) Spectrum of 11w in CDCl<sub>3</sub>

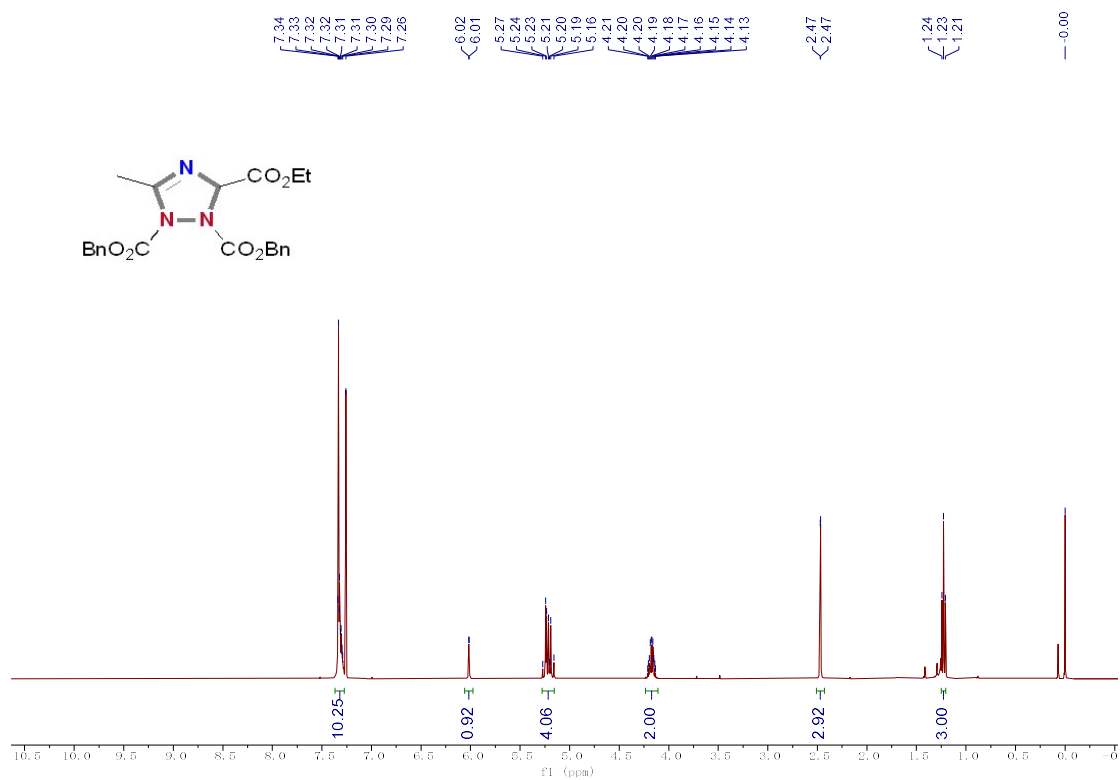

### <sup>13</sup>CNMR (100 MHz) Spectrum of 11w in CDCl<sub>3</sub>

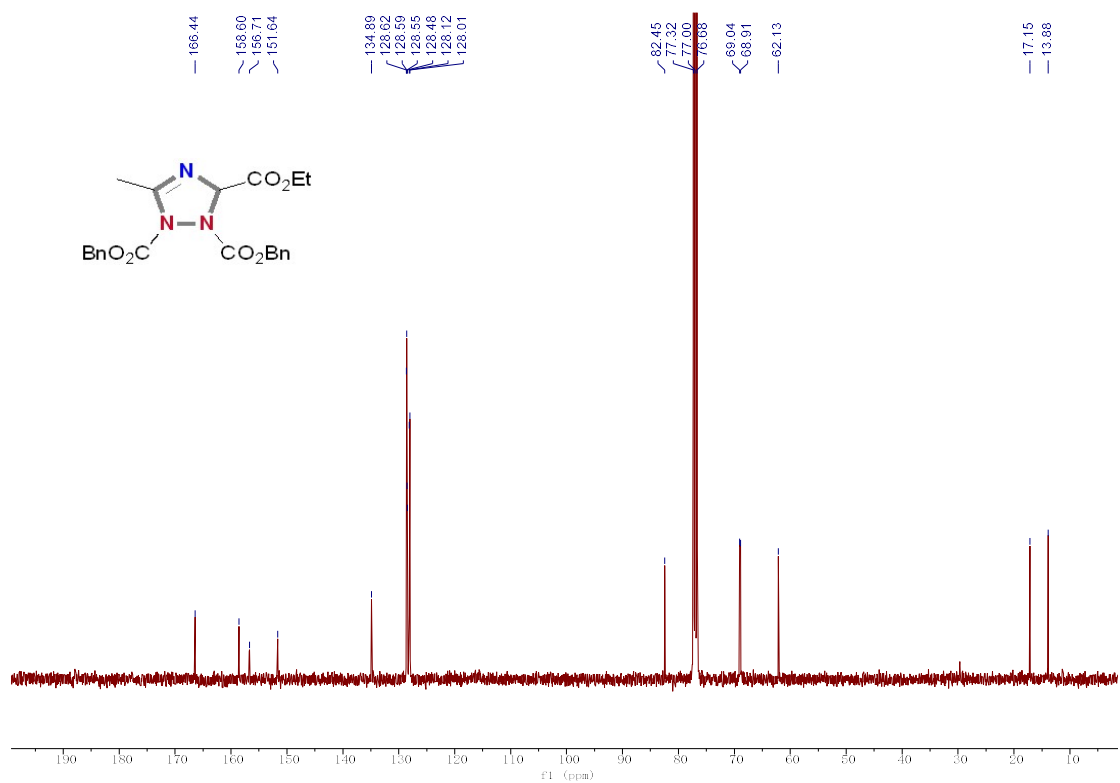

### <sup>1</sup>H NMR (400 MHz) Spectrum of 13a in CDCl<sub>3</sub>

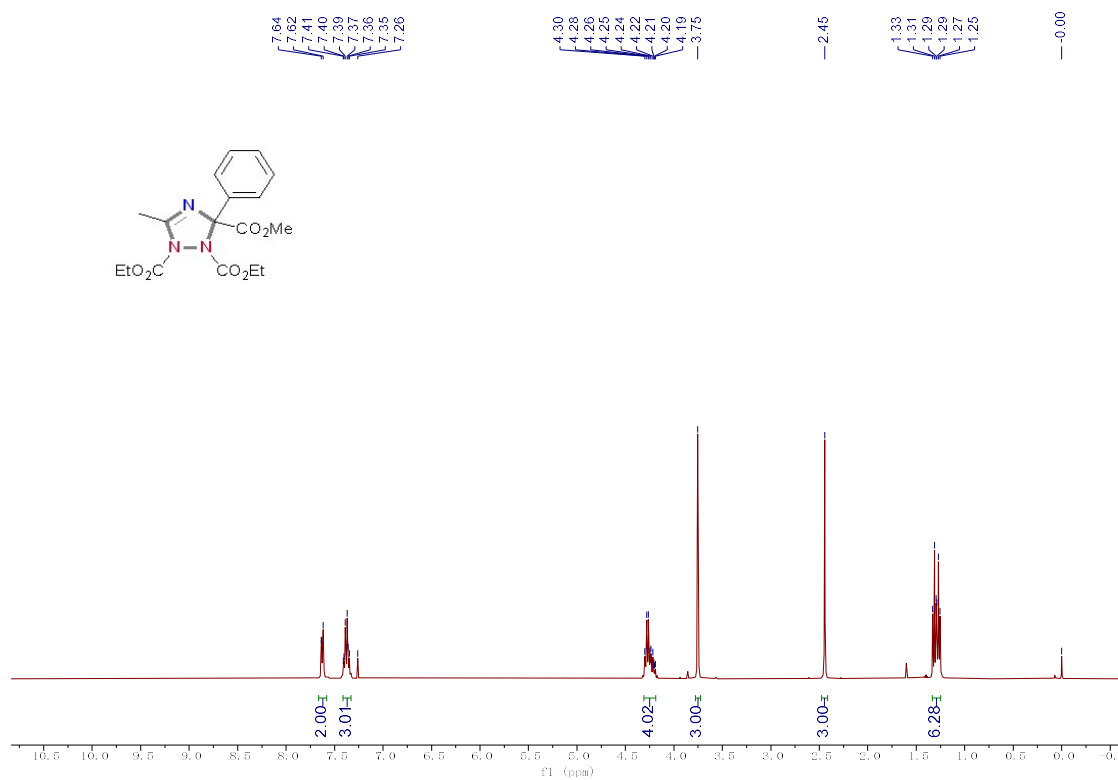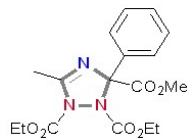

### <sup>13</sup>C NMR (100 MHz) Spectrum of 13a in CDCl<sub>3</sub>

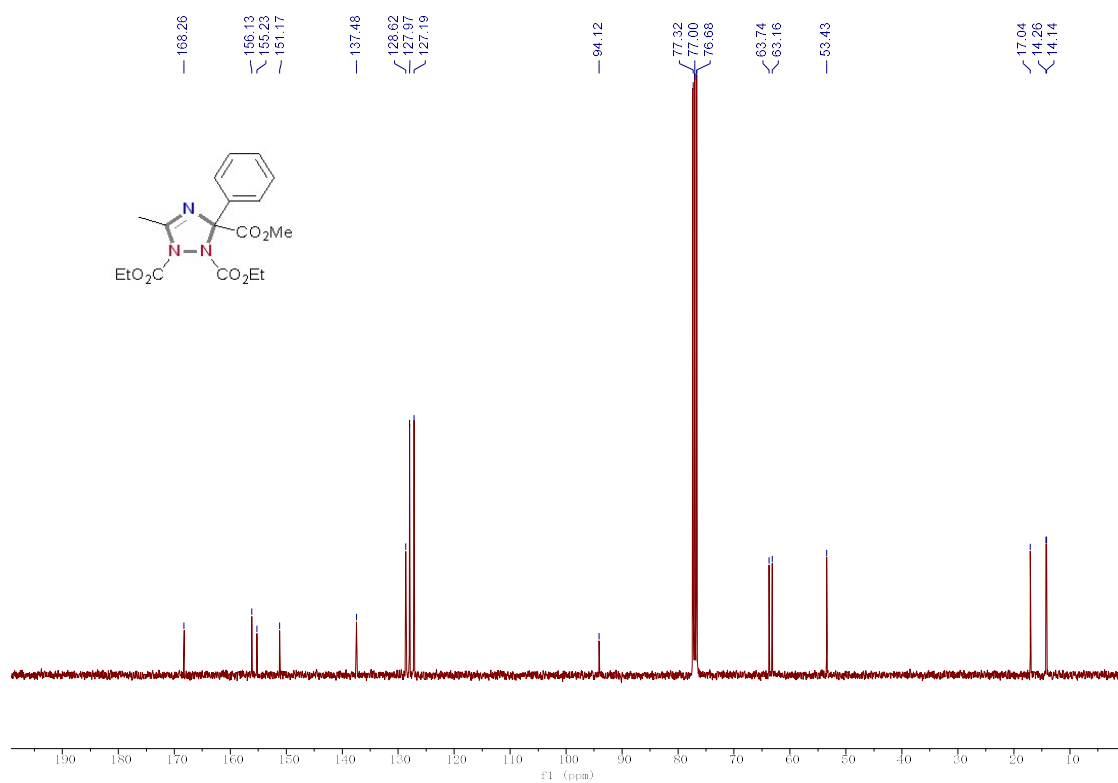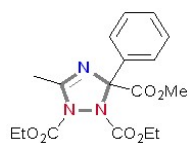

### <sup>1</sup>H NMR (400 MHz) Spectrum of 13b in CDCl<sub>3</sub>

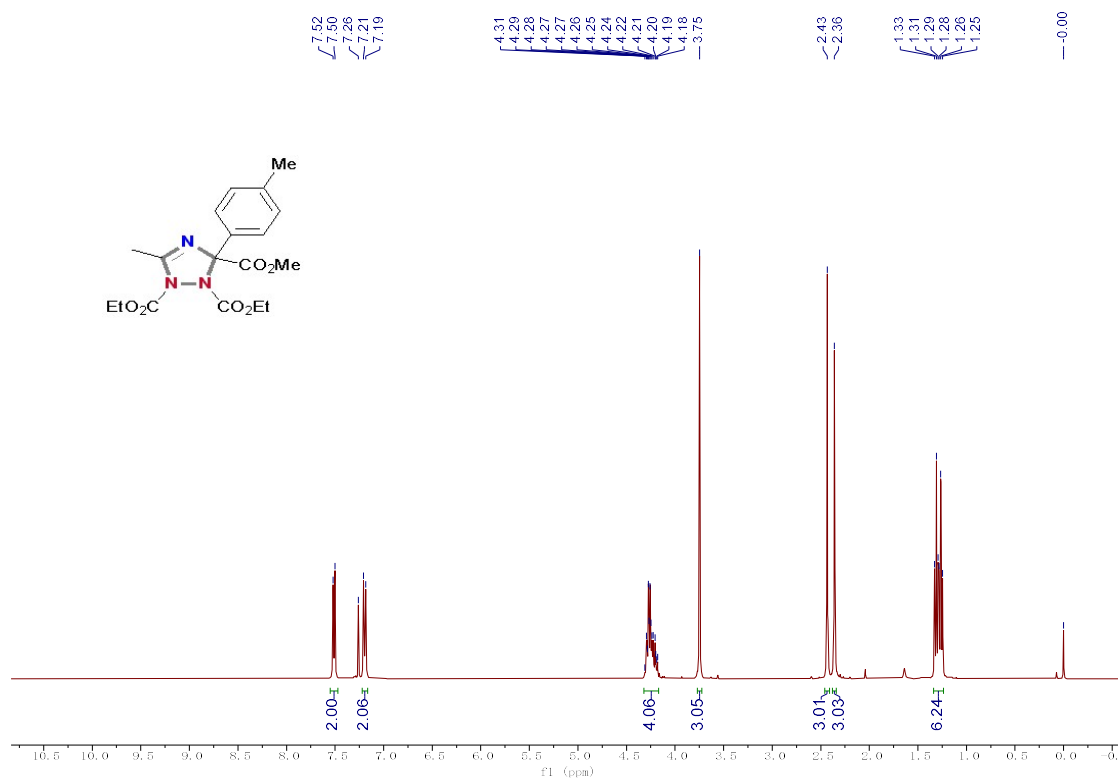

### <sup>13</sup>C NMR (100 MHz) Spectrum of 13b in CDCl<sub>3</sub>

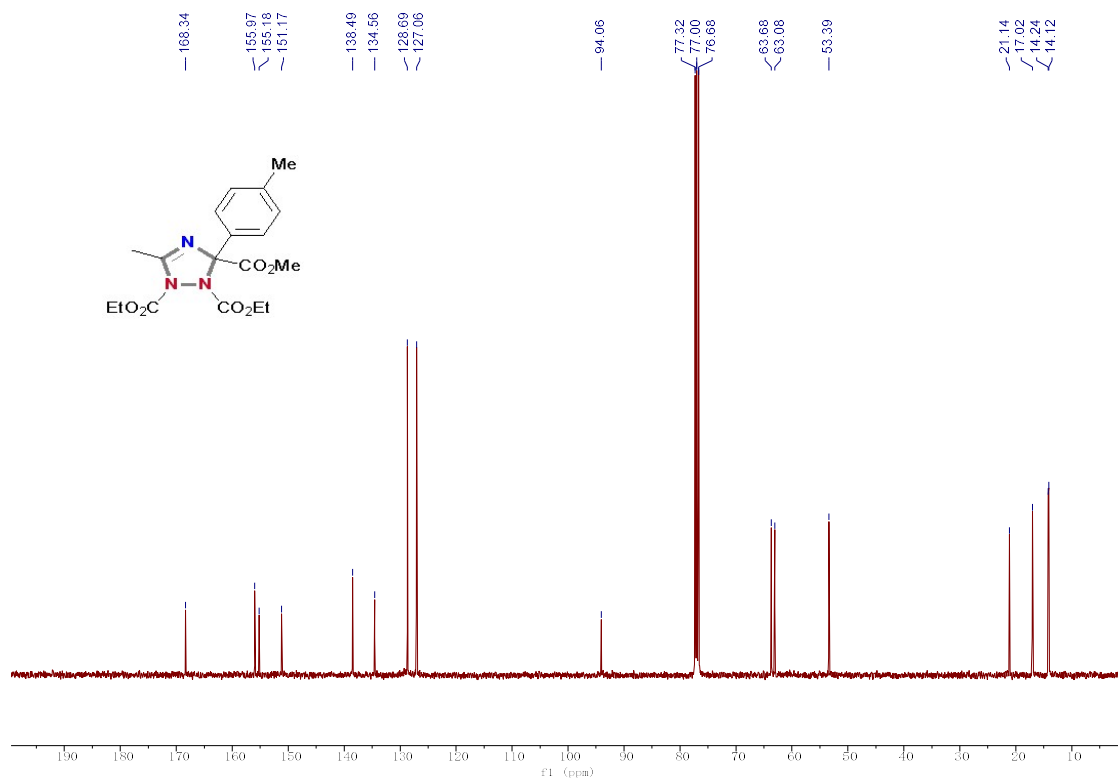

### <sup>1</sup>H NMR (400 MHz) Spectrum of 13c in CDCl<sub>3</sub>

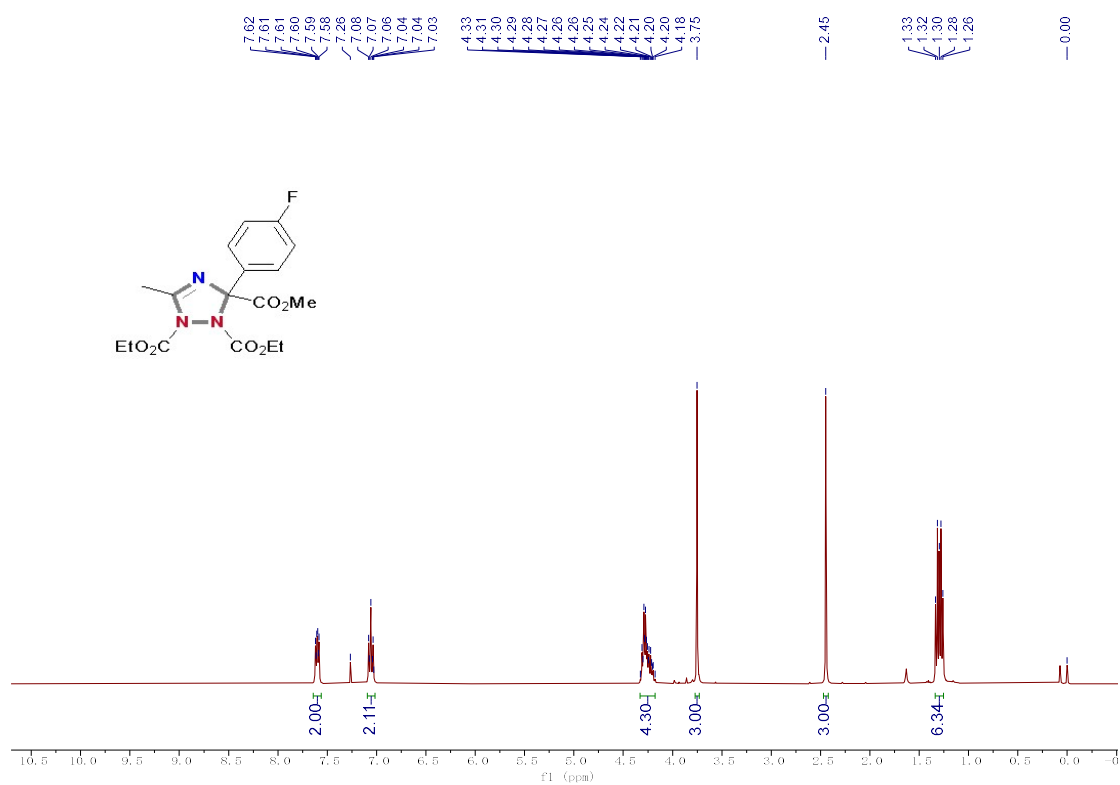

### <sup>13</sup>C NMR (100 MHz) Spectrum of 13c in CDCl<sub>3</sub>

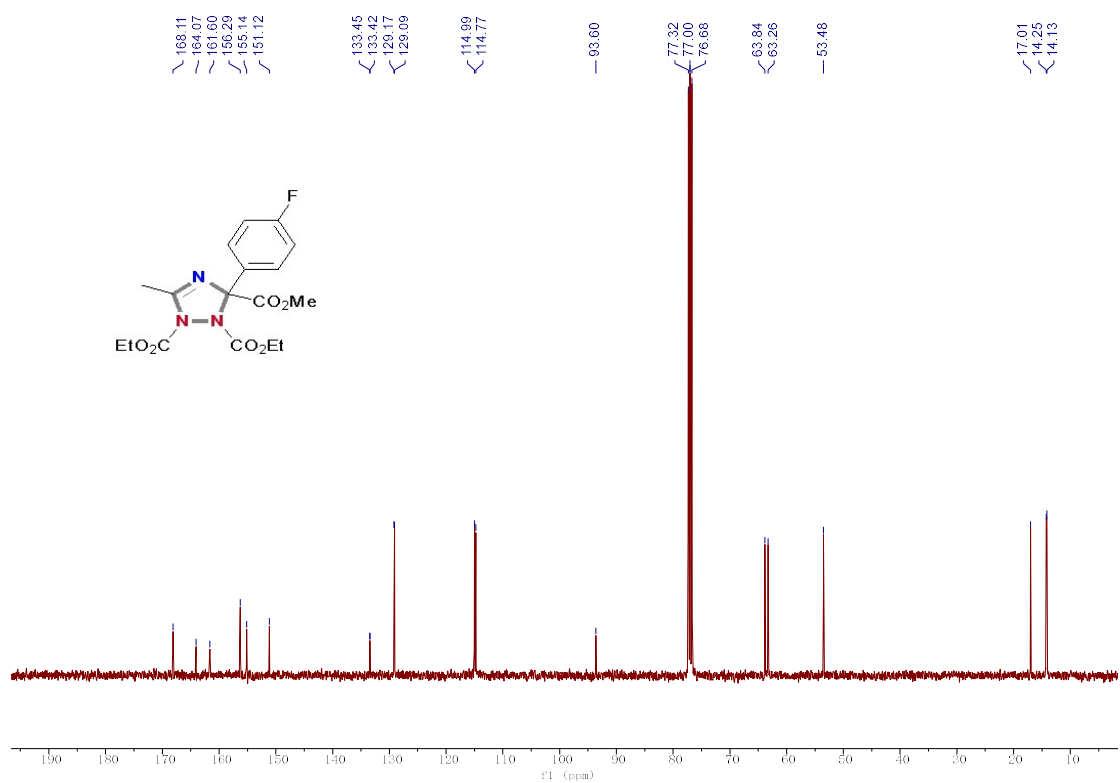

### <sup>1</sup>H NMR (400 MHz) Spectrum of 13d in CDCl<sub>3</sub>

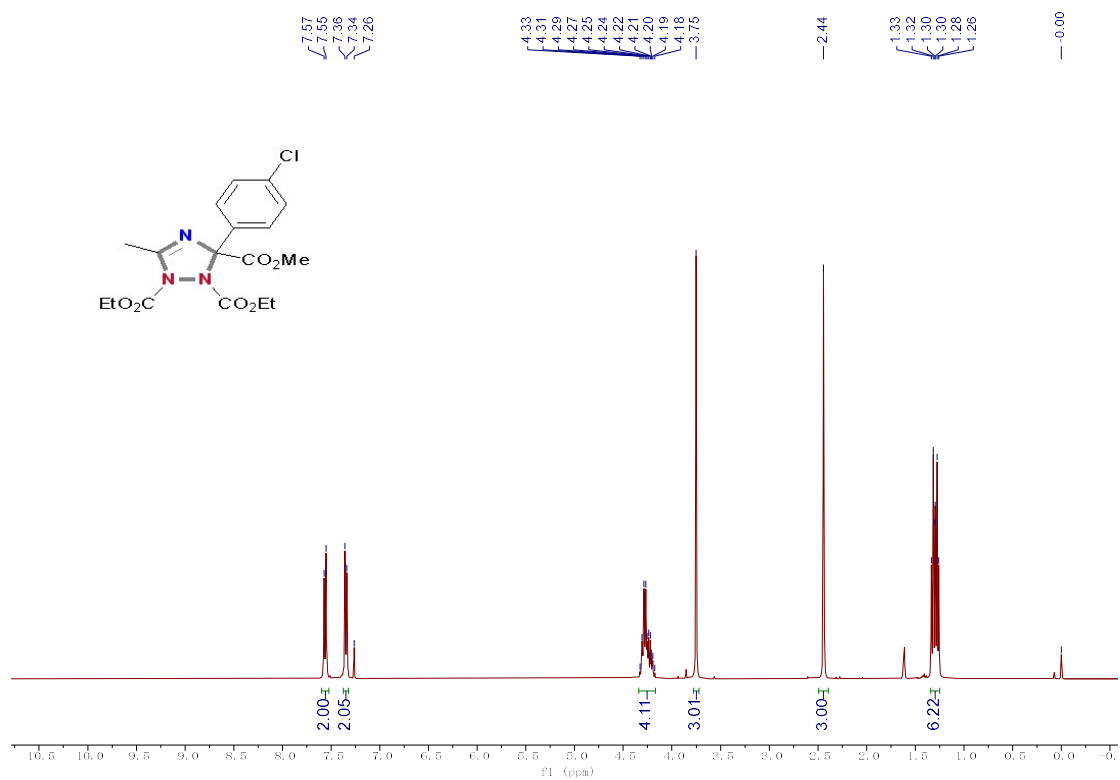

### <sup>13</sup>C NMR (100 MHz) Spectrum of 13d in CDCl<sub>3</sub>

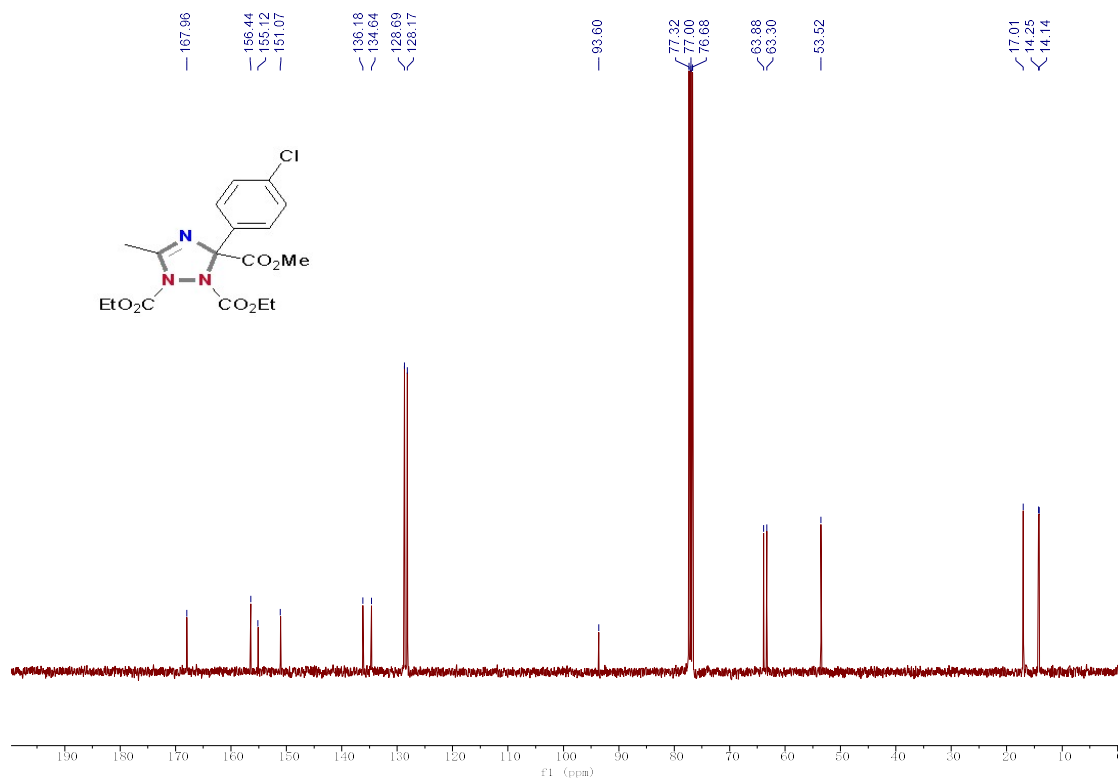



### <sup>1</sup>H NMR (400 MHz) Spectrum of 13e in CDCl<sub>3</sub>

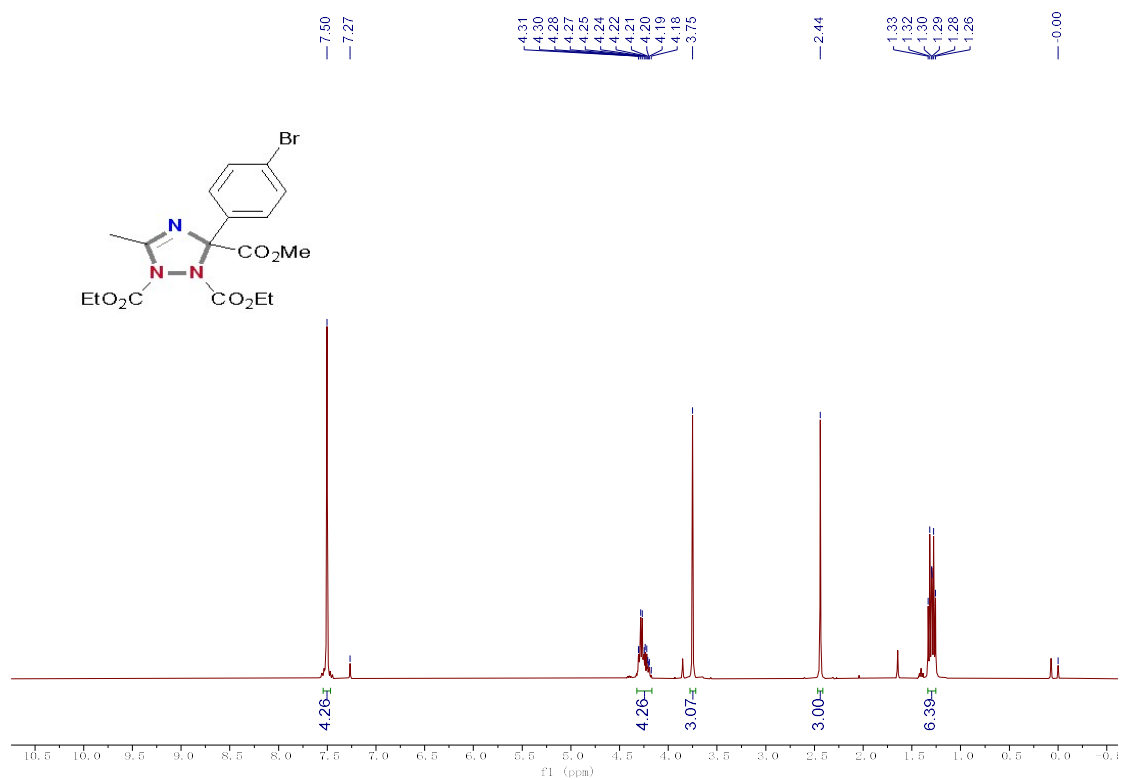

### <sup>13</sup>C NMR (100 MHz) Spectrum of 13e in CDCl<sub>3</sub>

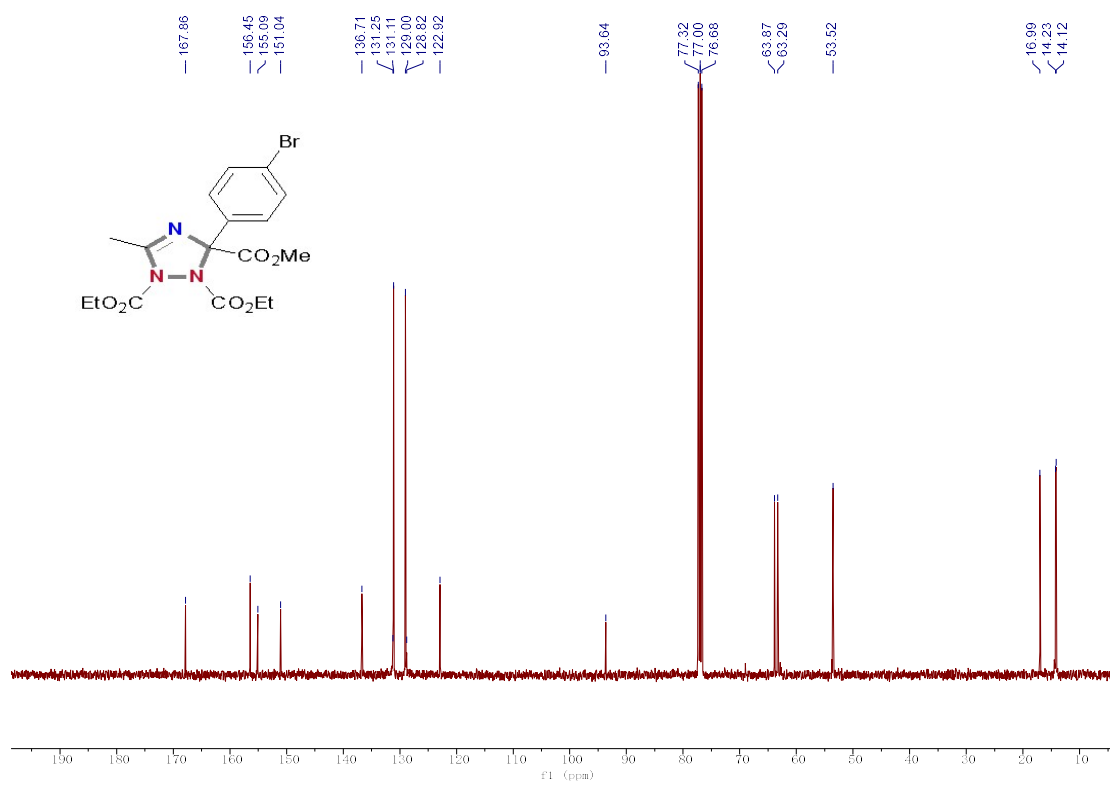

### <sup>1</sup>H NMR (400 MHz) Spectrum of 13f in CDCl<sub>3</sub>

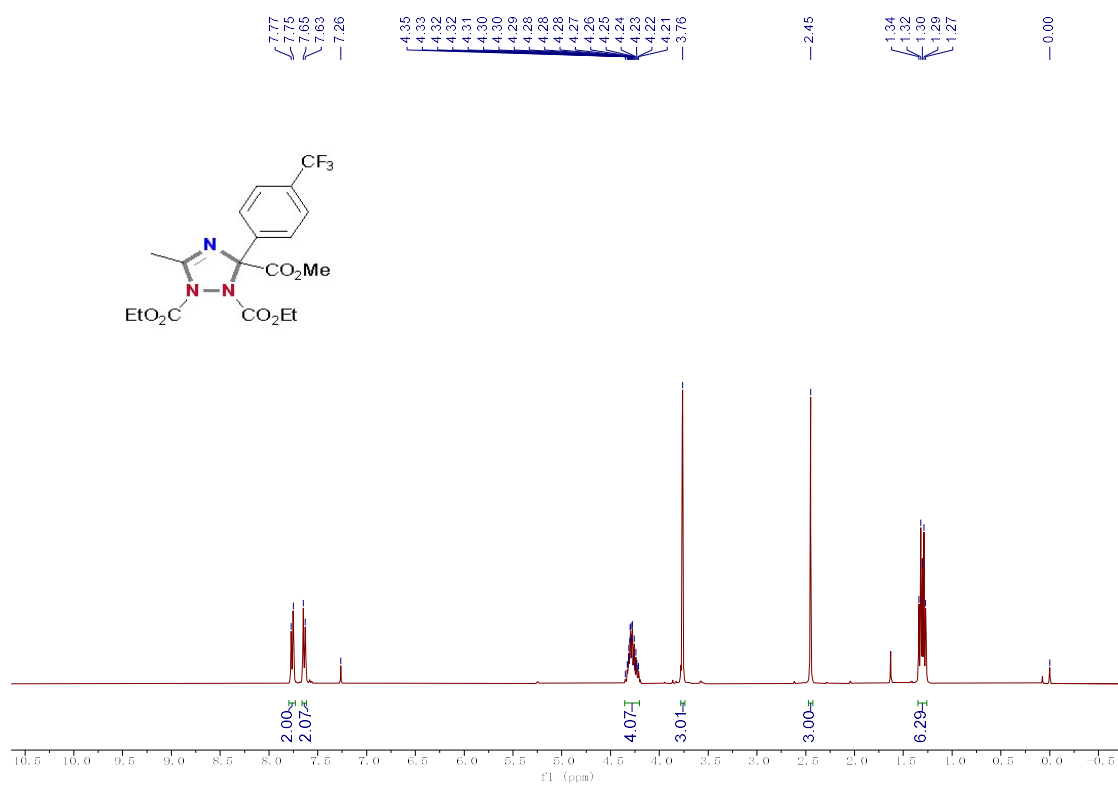

### <sup>13</sup>C NMR (100 MHz) Spectrum of 13f in CDCl<sub>3</sub>

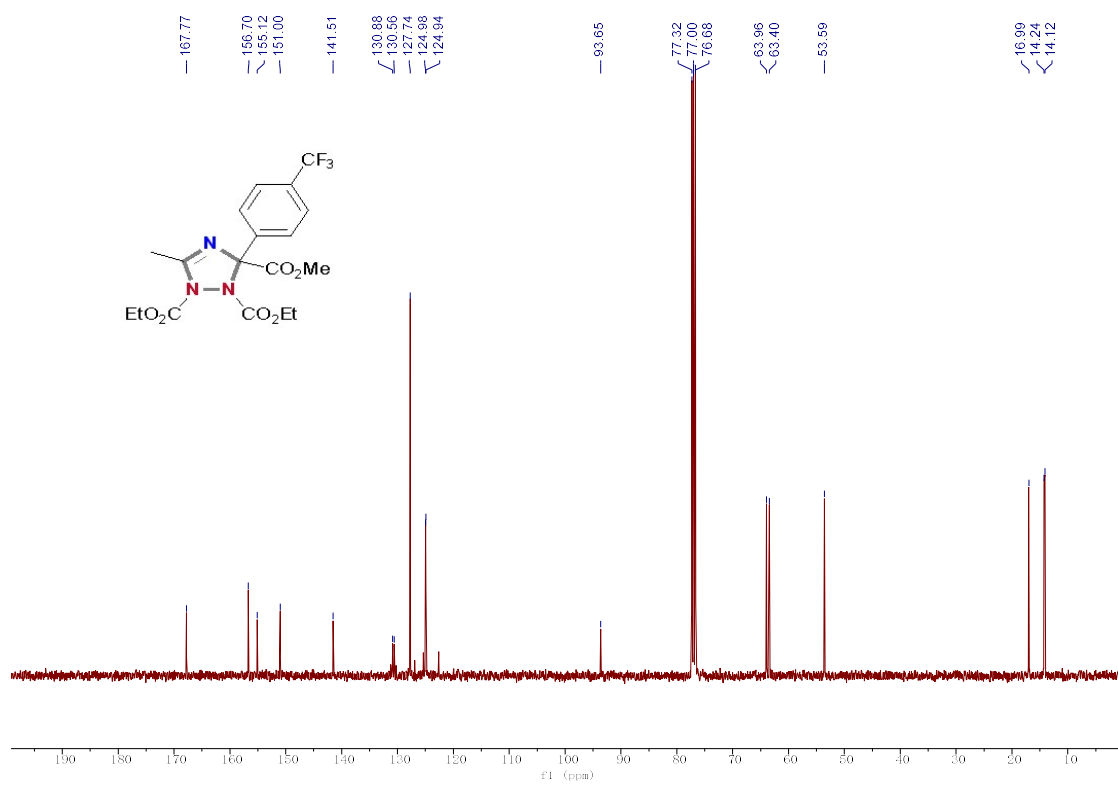

### <sup>1</sup>H NMR (400 MHz) Spectrum of 13g in CDCl<sub>3</sub>

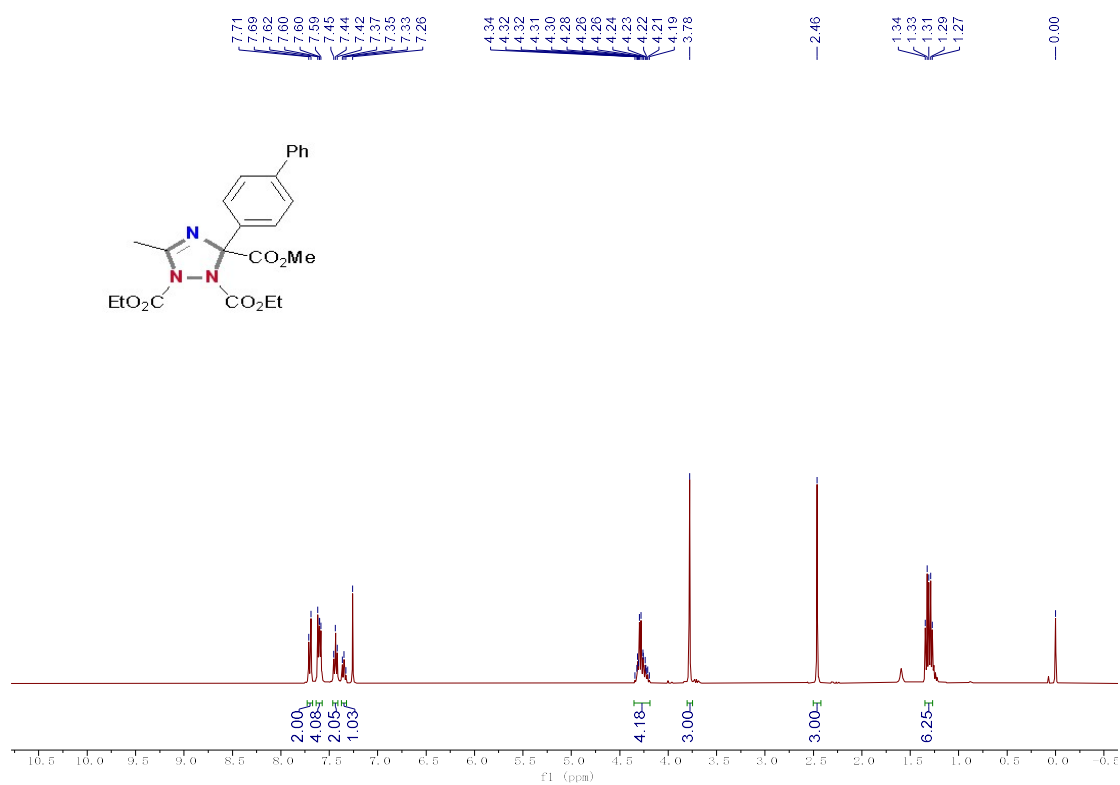

### <sup>13</sup>C NMR (100 MHz) Spectrum of 13g in CDCl<sub>3</sub>

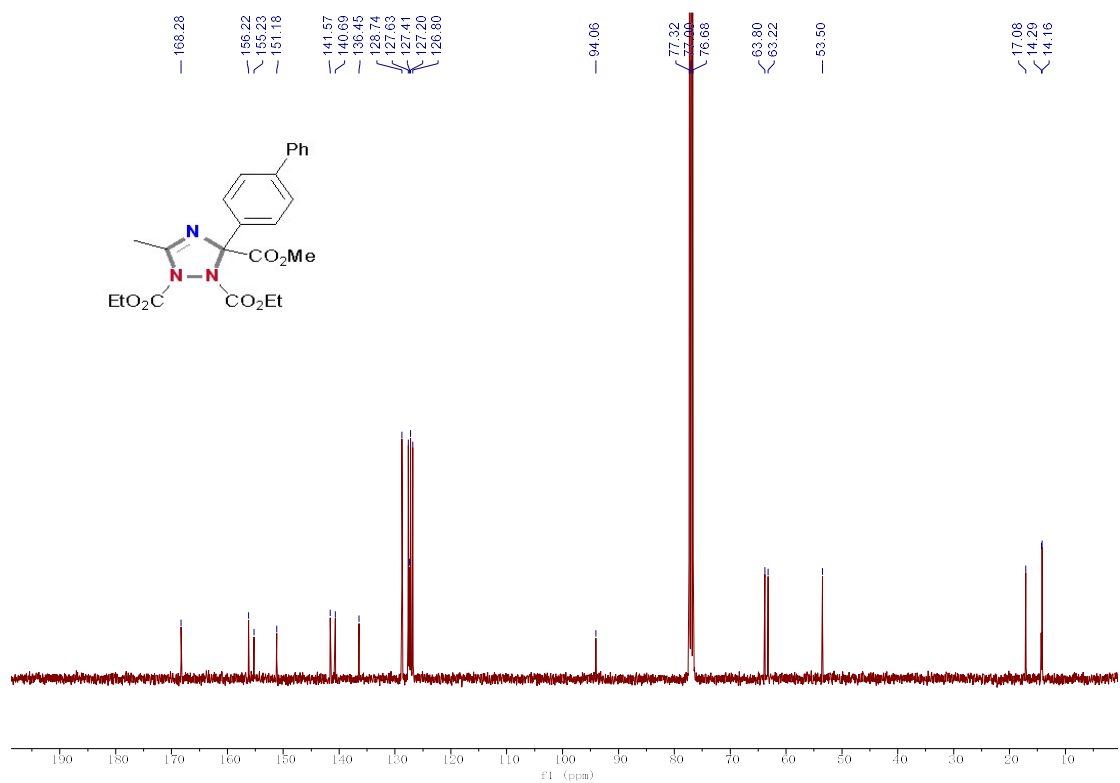

### <sup>1</sup>H NMR (400 MHz) Spectrum of 13h in CDCl<sub>3</sub>

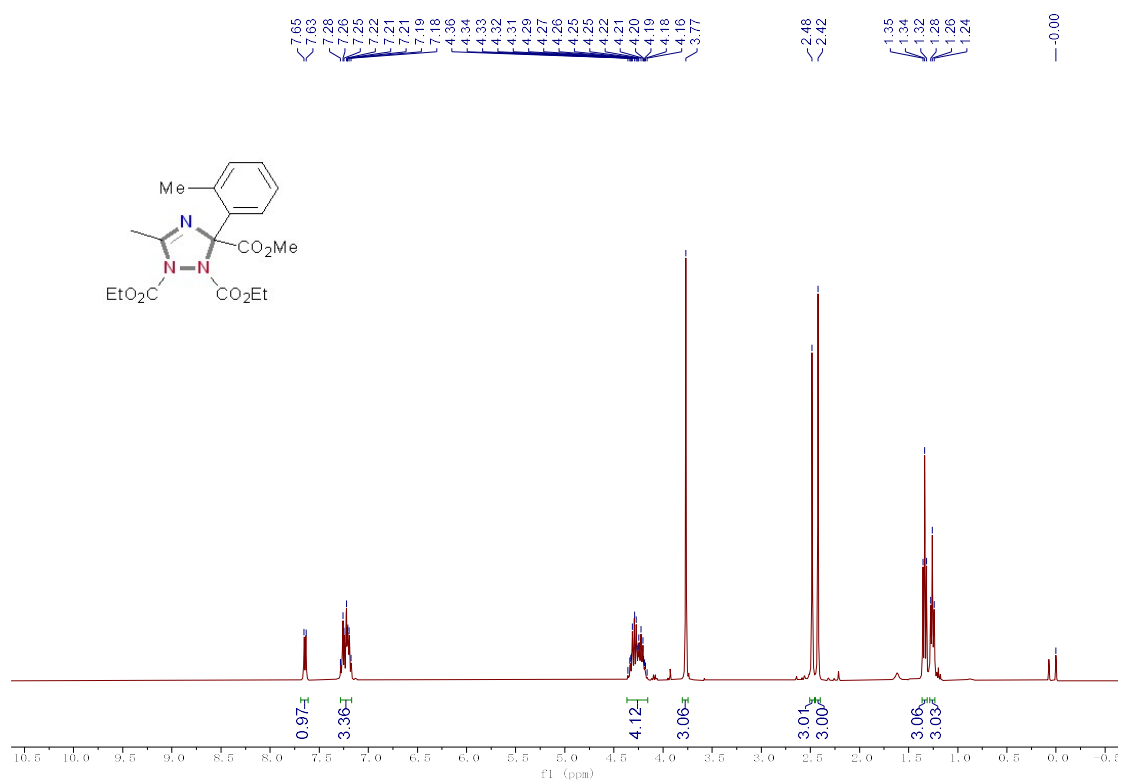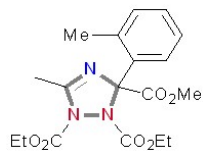

### <sup>13</sup>CNMR (100 MHz) Spectrum of 13h in CDCl<sub>3</sub>

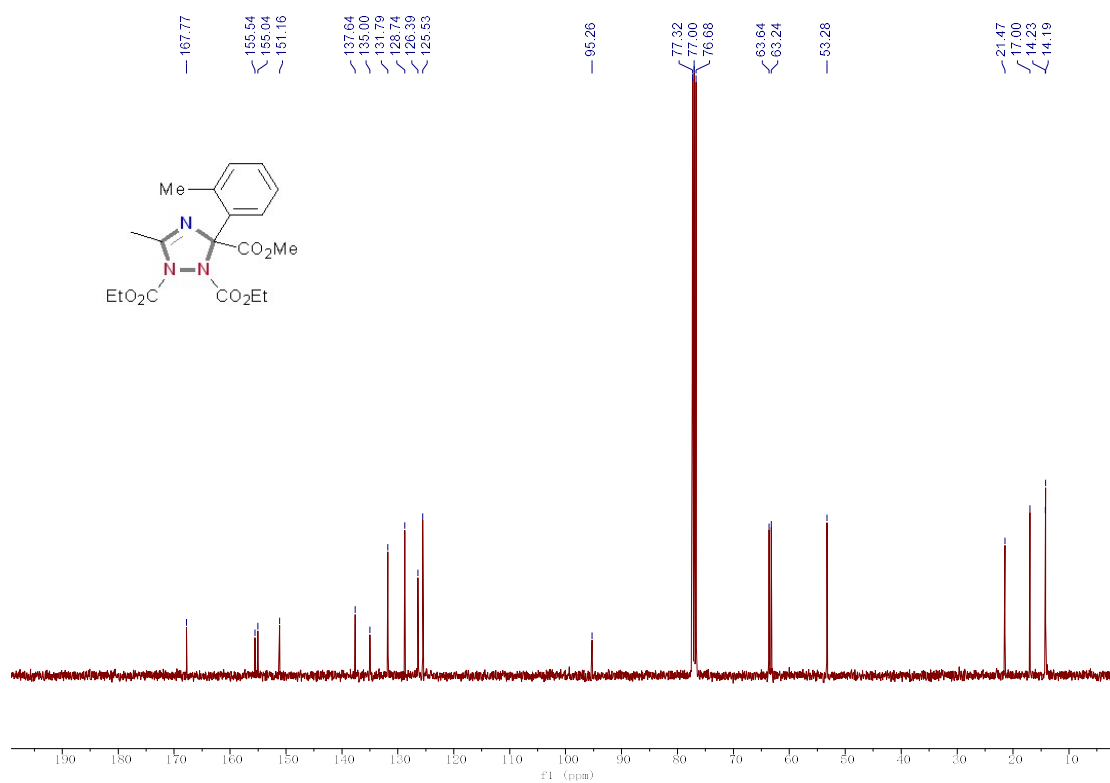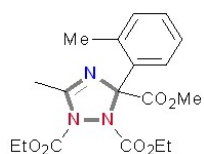

### <sup>1</sup>H NMR (400 MHz) Spectrum of 13i in CDCl<sub>3</sub>

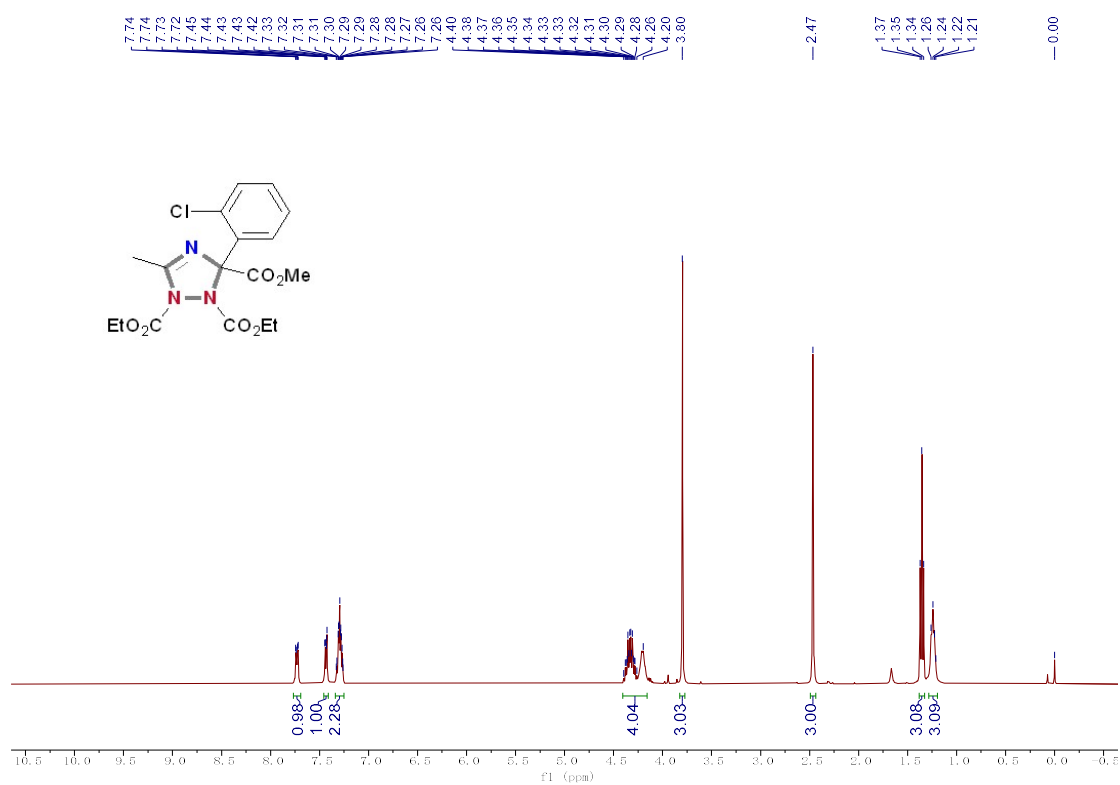

### <sup>13</sup>CNMR (100 MHz) Spectrum of 13i in CDCl<sub>3</sub>

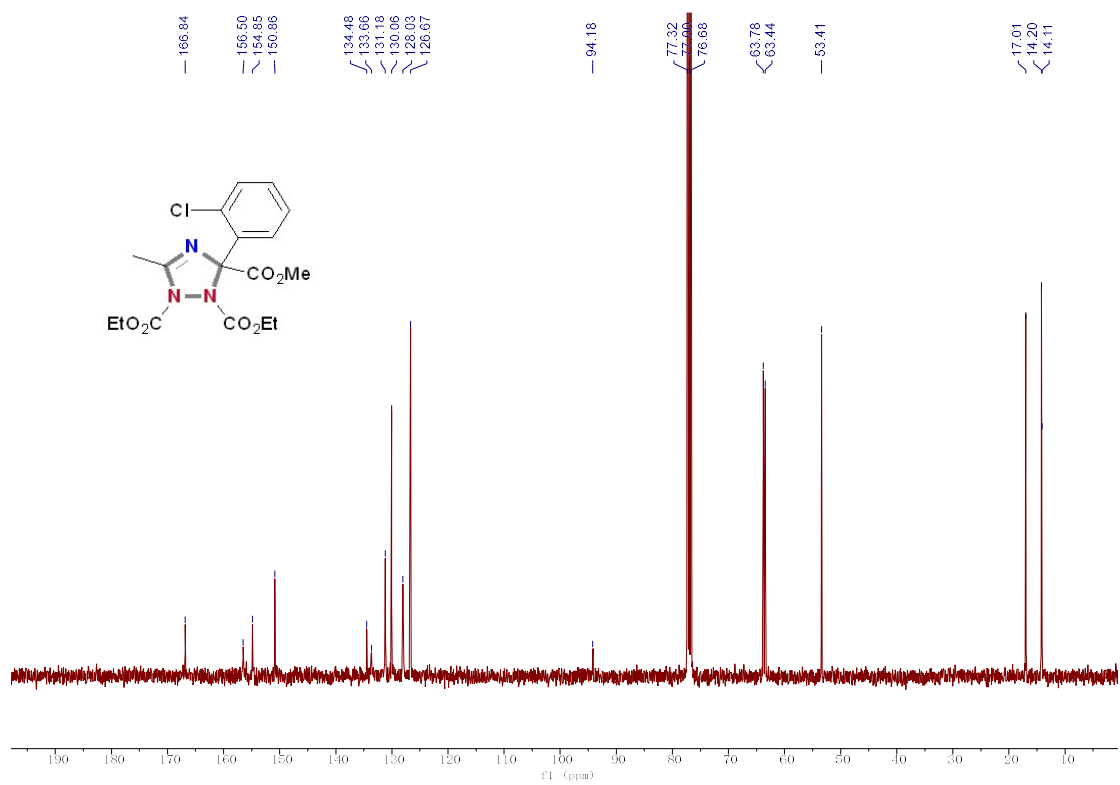

### <sup>1</sup>H NMR (400 MHz) Spectrum of 13j in CDCl<sub>3</sub>

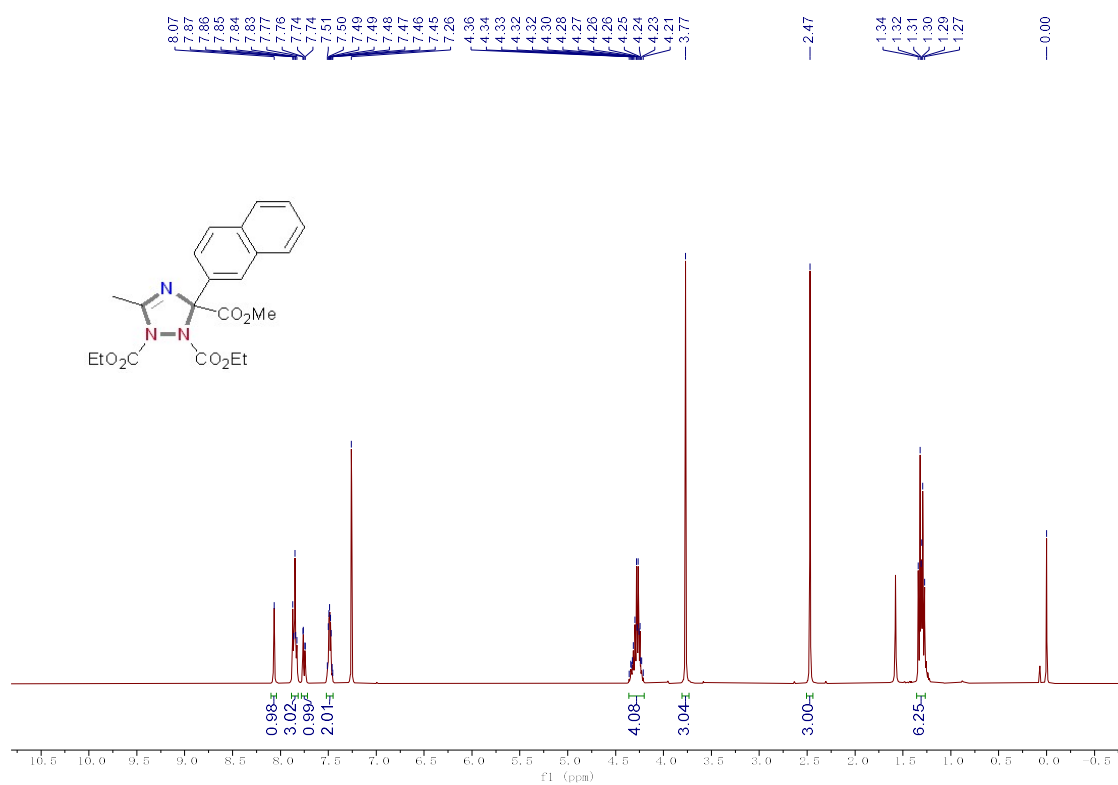

### <sup>13</sup>C NMR (100 MHz) Spectrum of 13j in CDCl<sub>3</sub>

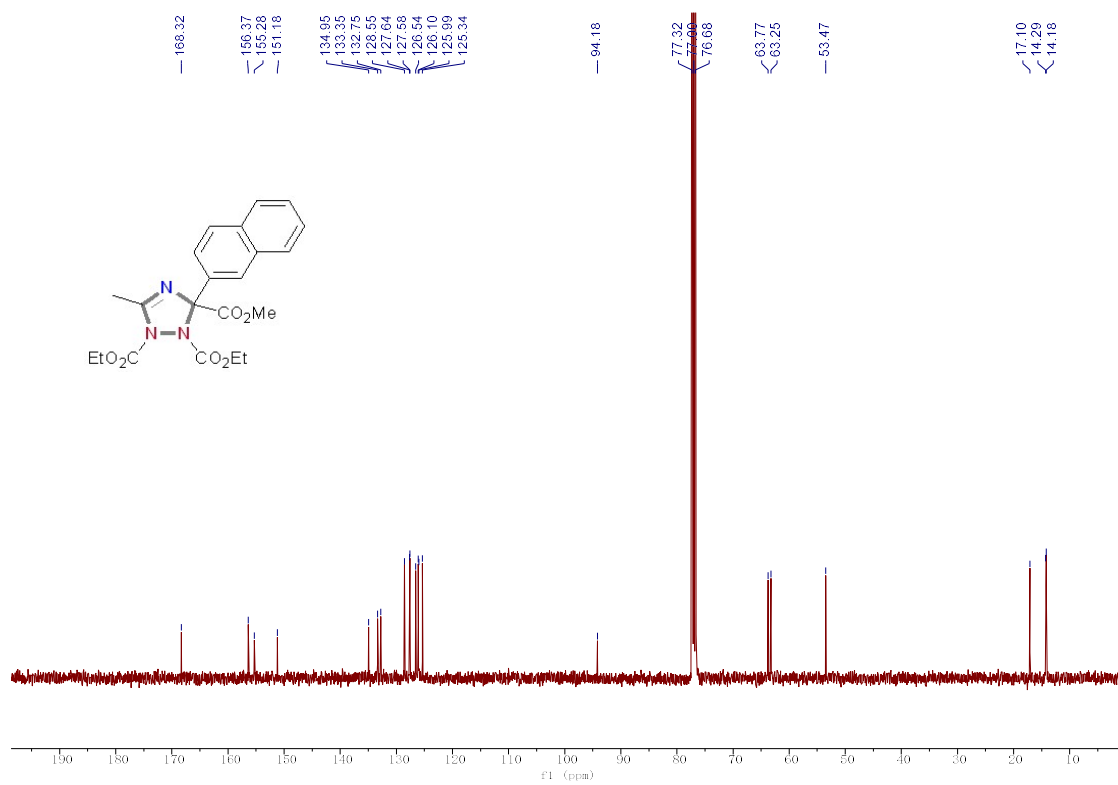

### <sup>1</sup>H NMR (400 MHz) Spectrum of 13k in CDCl<sub>3</sub>

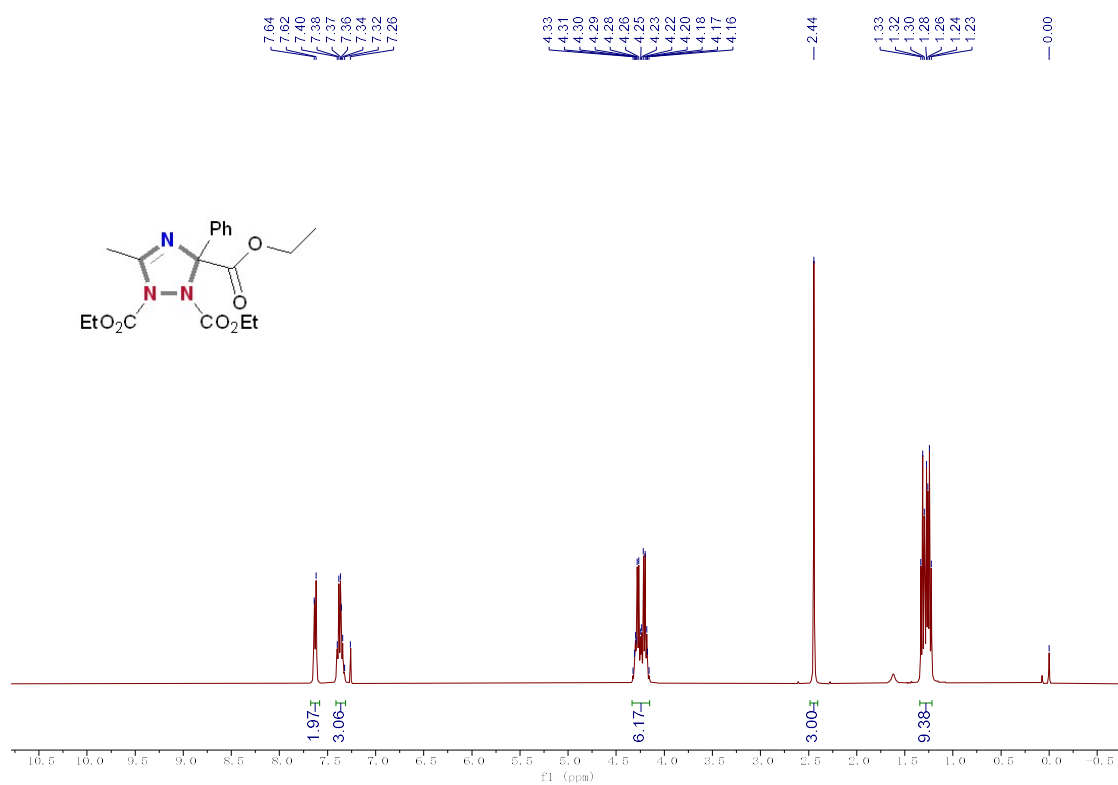

### <sup>13</sup>C NMR (100 MHz) Spectrum of 13k in CDCl<sub>3</sub>

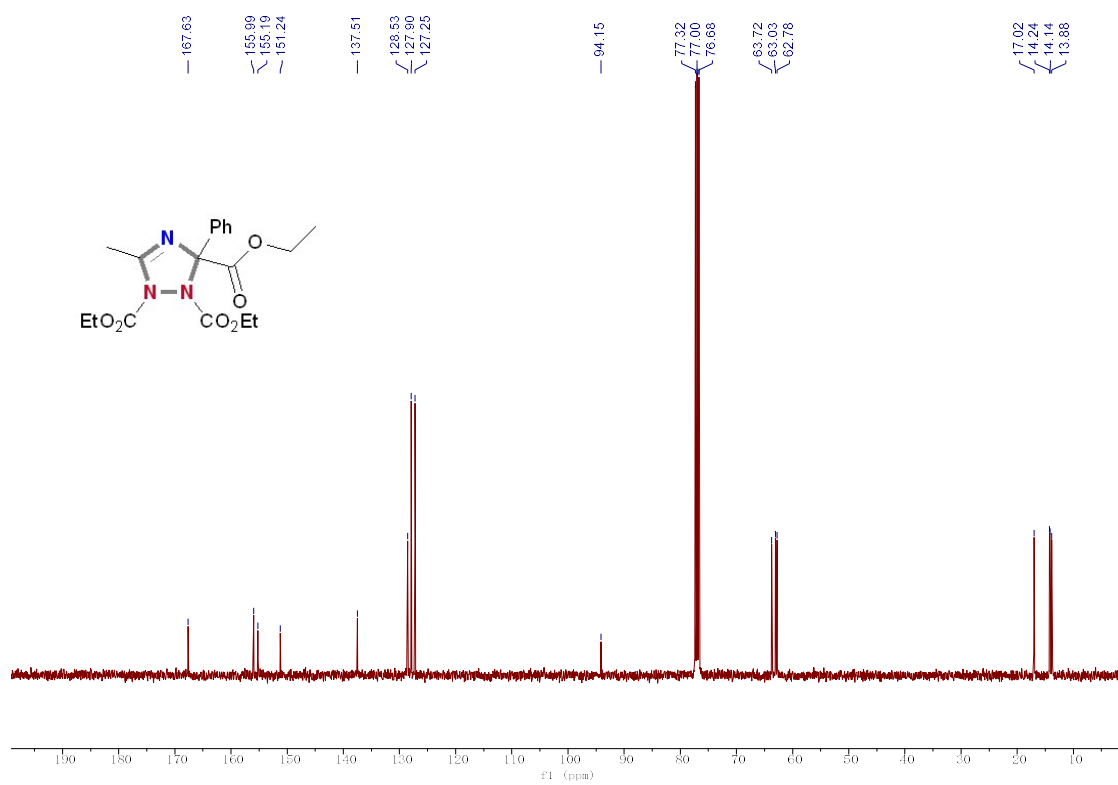

### <sup>1</sup>H NMR (400 MHz) Spectrum of 13l in CDCl<sub>3</sub>

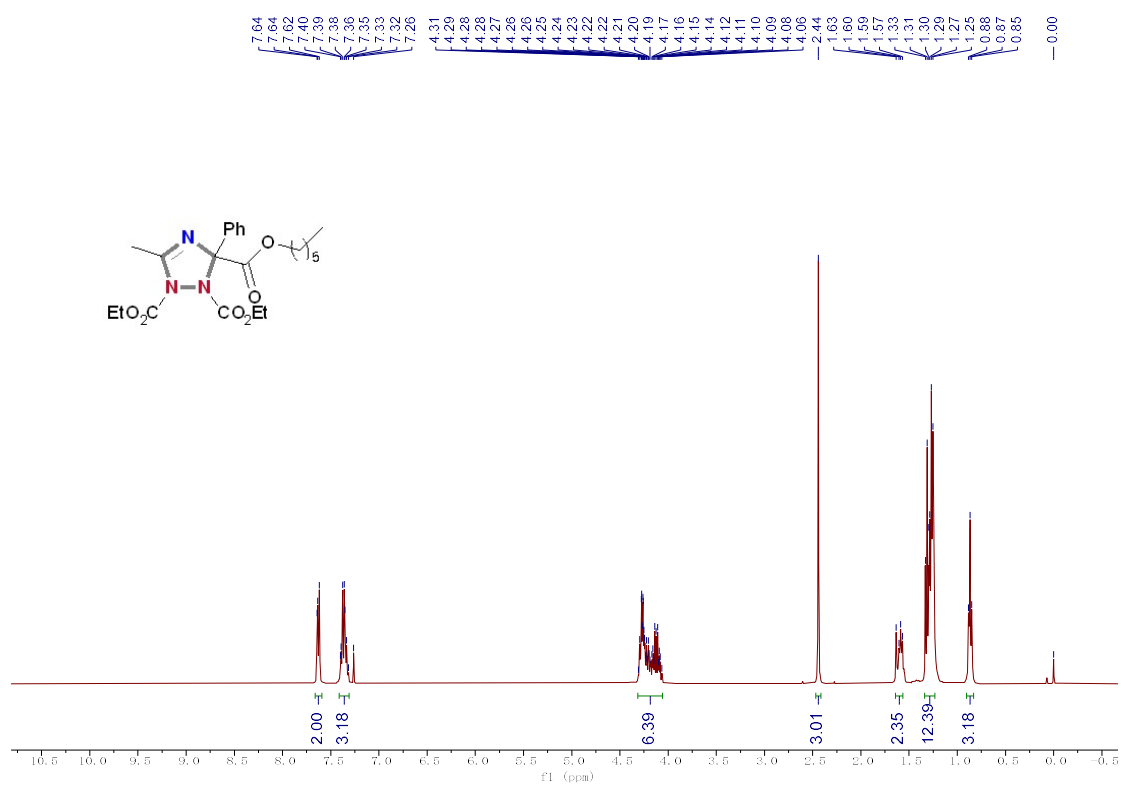

### <sup>13</sup>C NMR (100 MHz) Spectrum of 13l in CDCl<sub>3</sub>

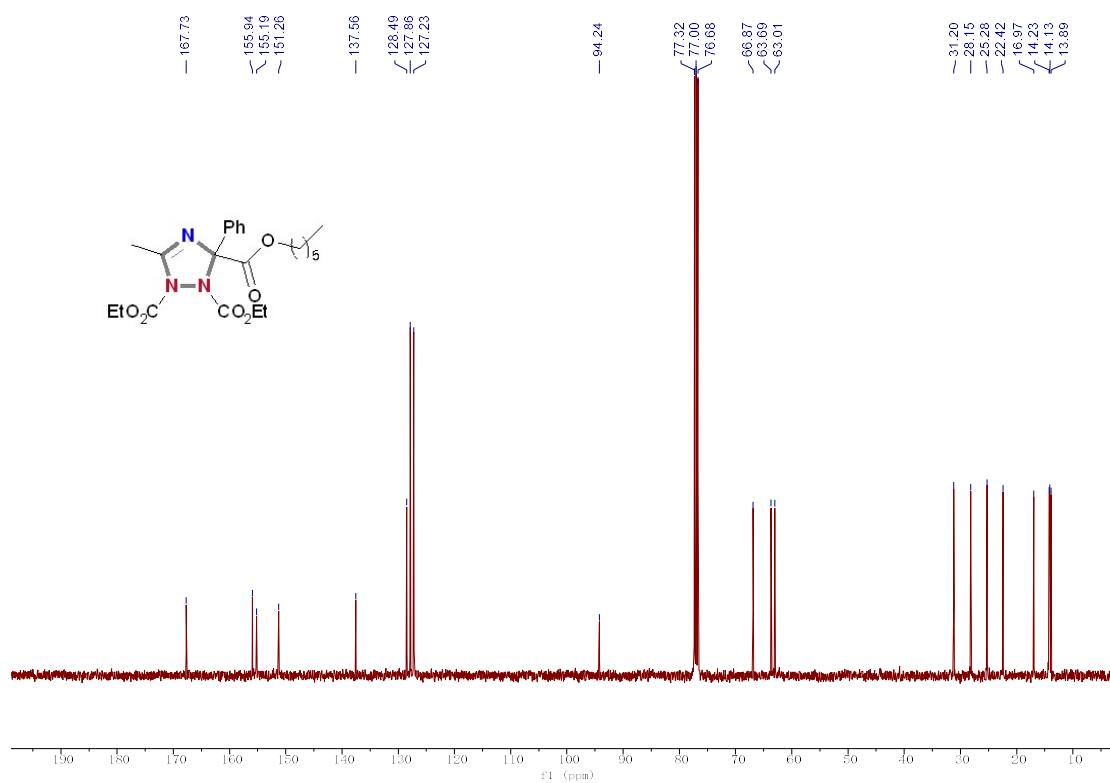



### <sup>1</sup>H NMR (400 MHz) Spectrum of 13m in CDCl<sub>3</sub>

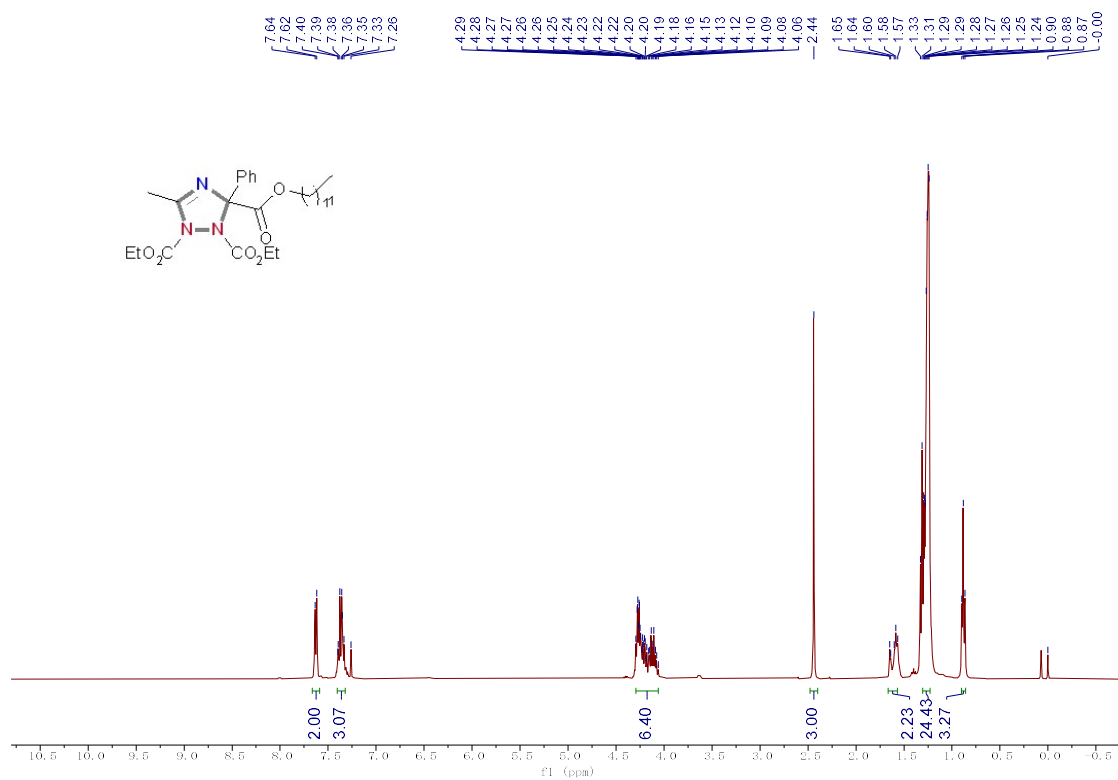

### <sup>13</sup>C NMR (100 MHz) Spectrum of 13m in CDCl<sub>3</sub>

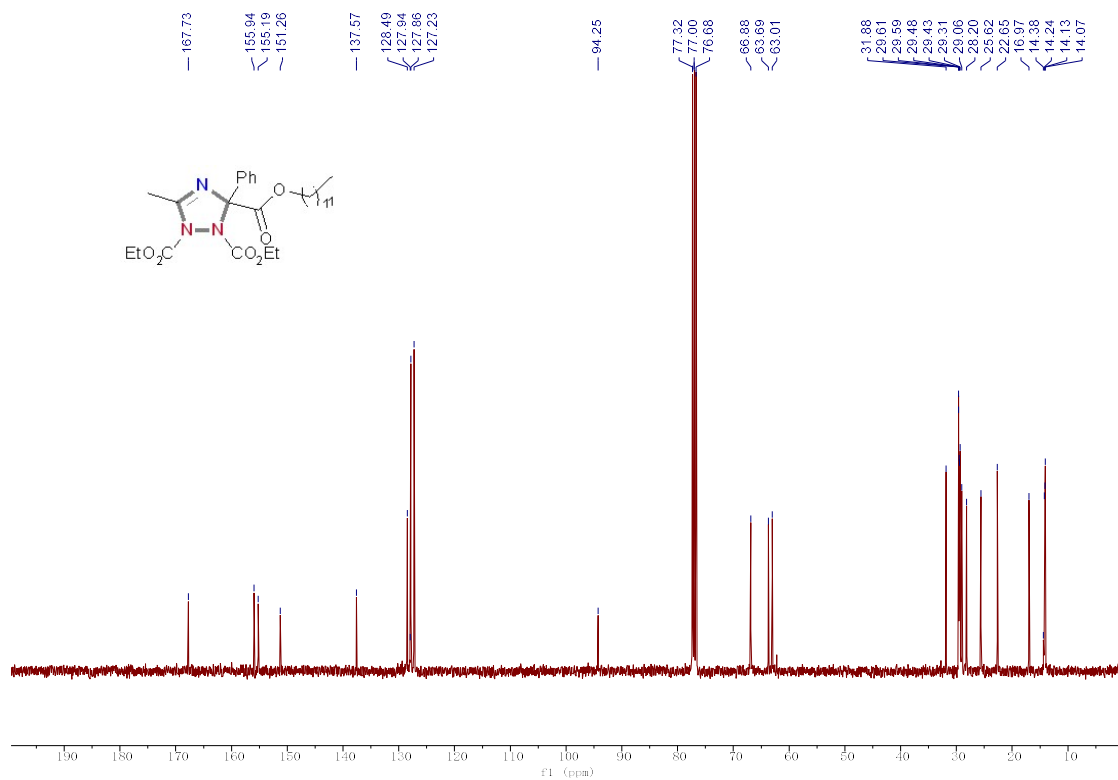

### <sup>1</sup>H NMR (400 MHz) Spectrum of 13n in CDCl<sub>3</sub>

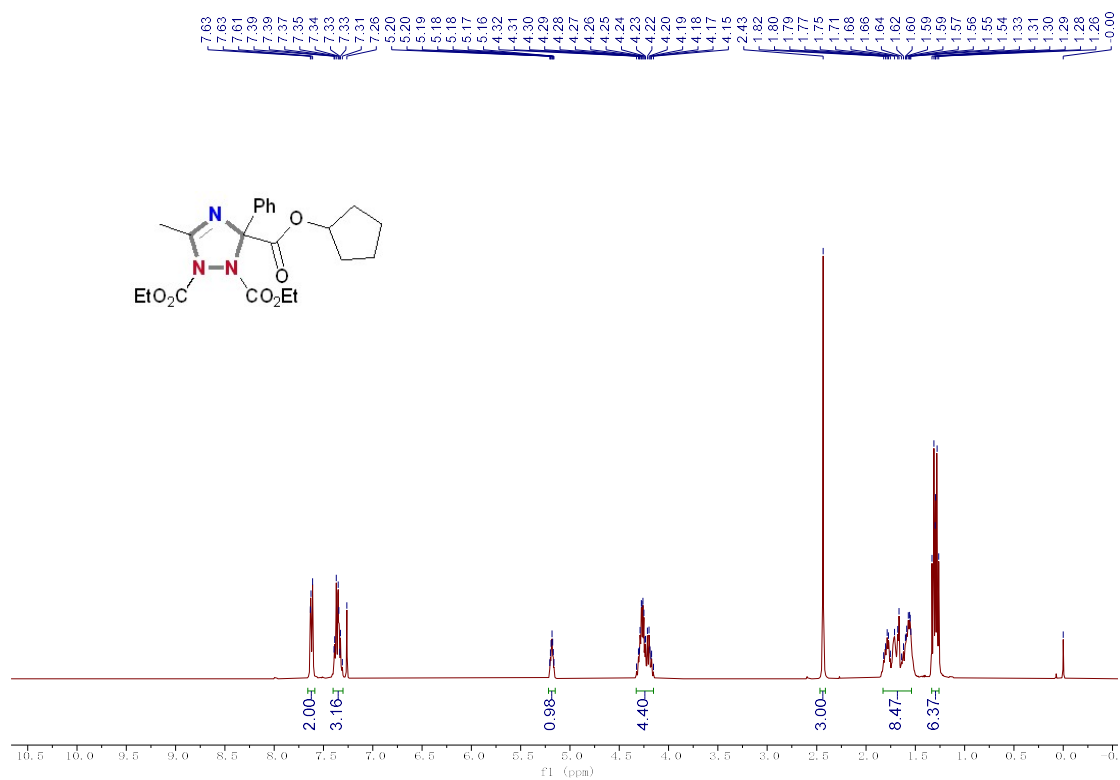

### <sup>13</sup>C NMR (100 MHz) Spectrum of 13n in CDCl<sub>3</sub>

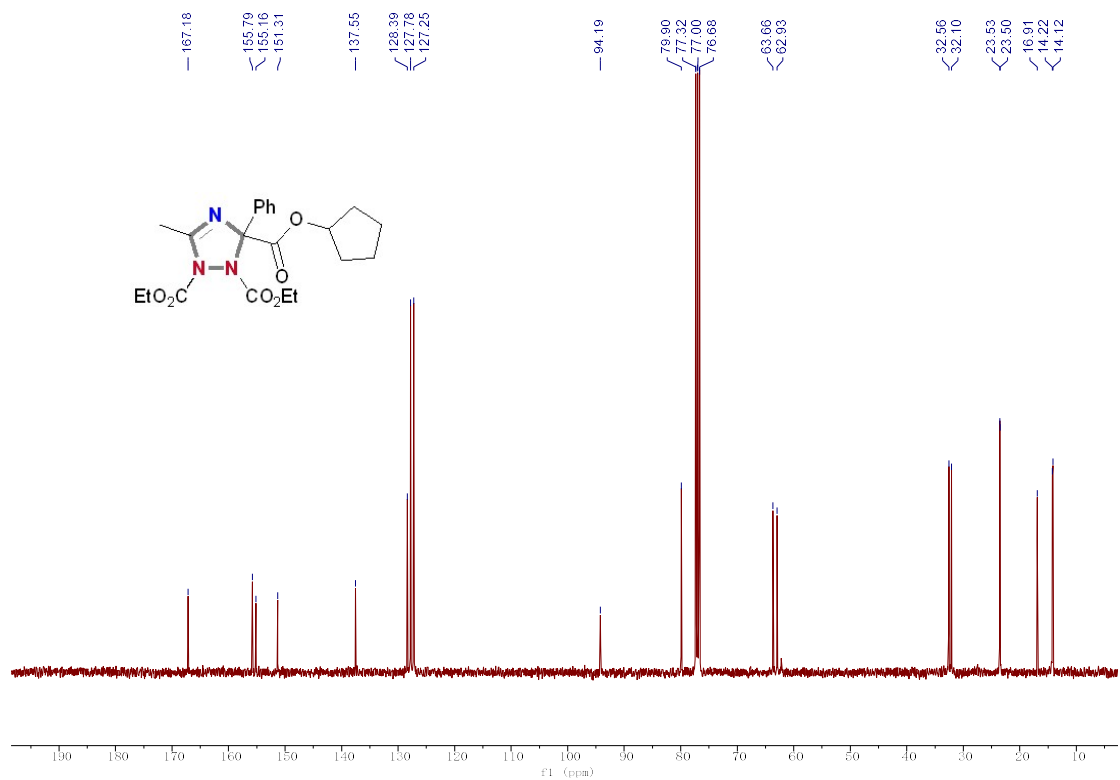

### <sup>1</sup>H NMR (400 MHz) Spectrum of 13o in CDCl<sub>3</sub>

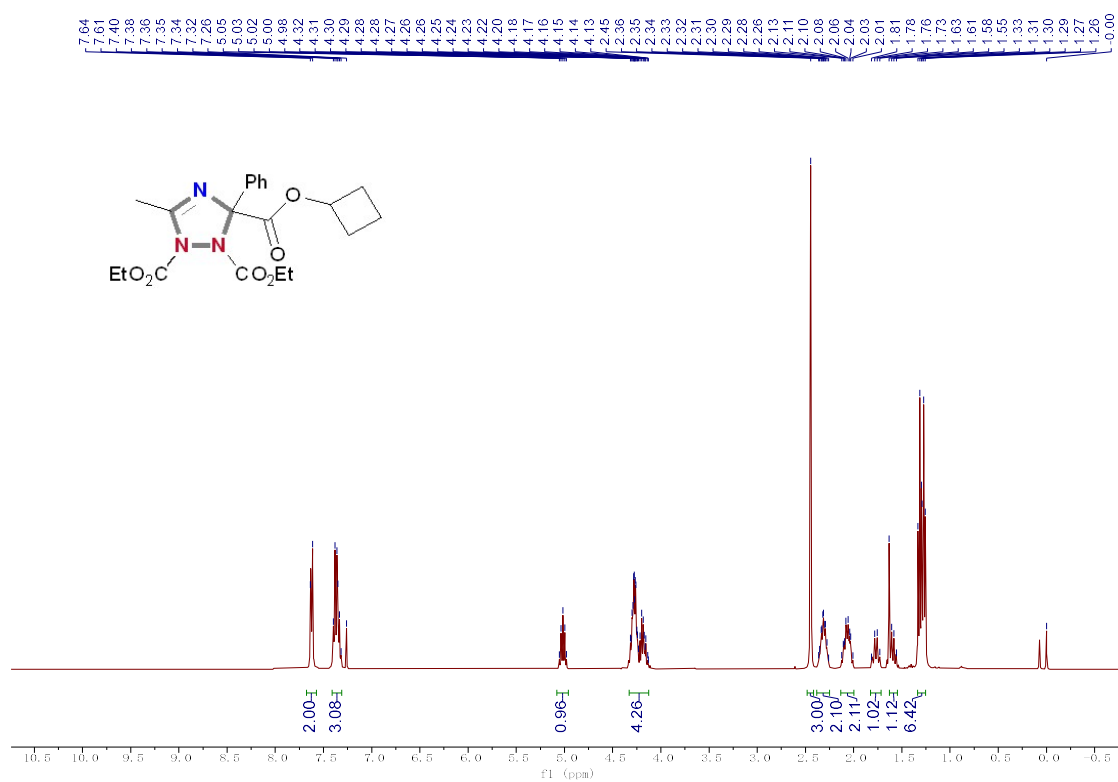

### <sup>13</sup>C NMR (100 MHz) Spectrum of 13o in CDCl<sub>3</sub>

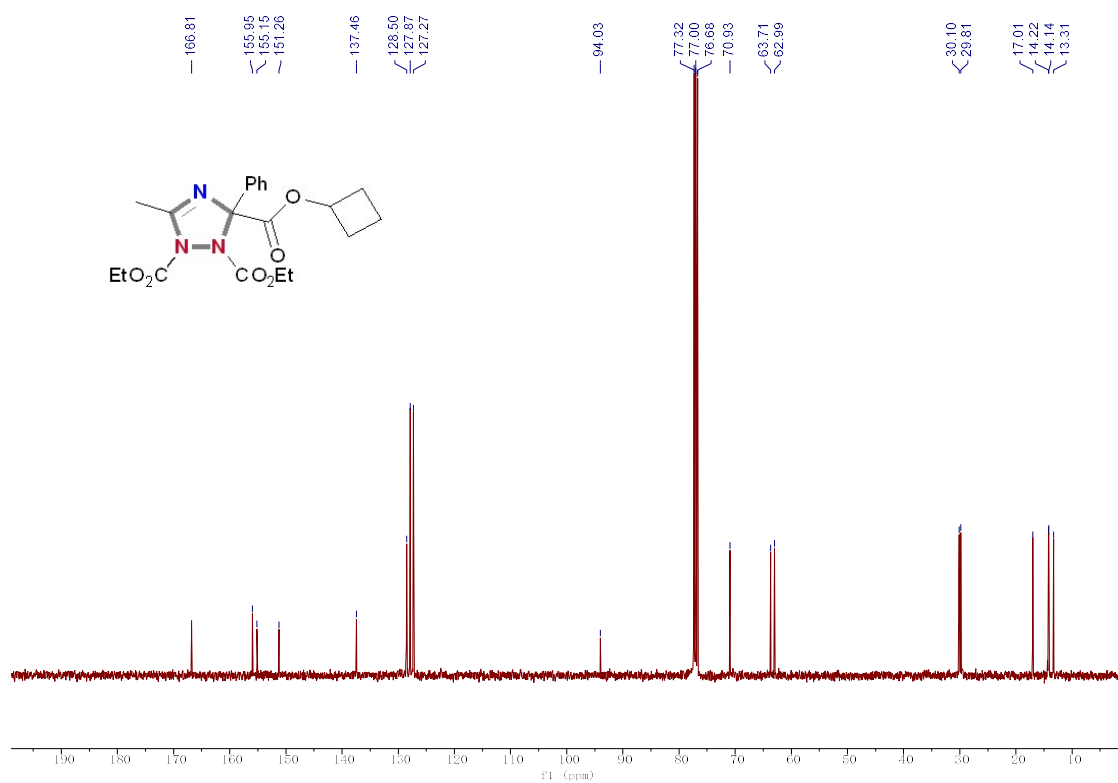

### <sup>1</sup>H NMR (400 MHz) Spectrum of 13p in CDCl<sub>3</sub>

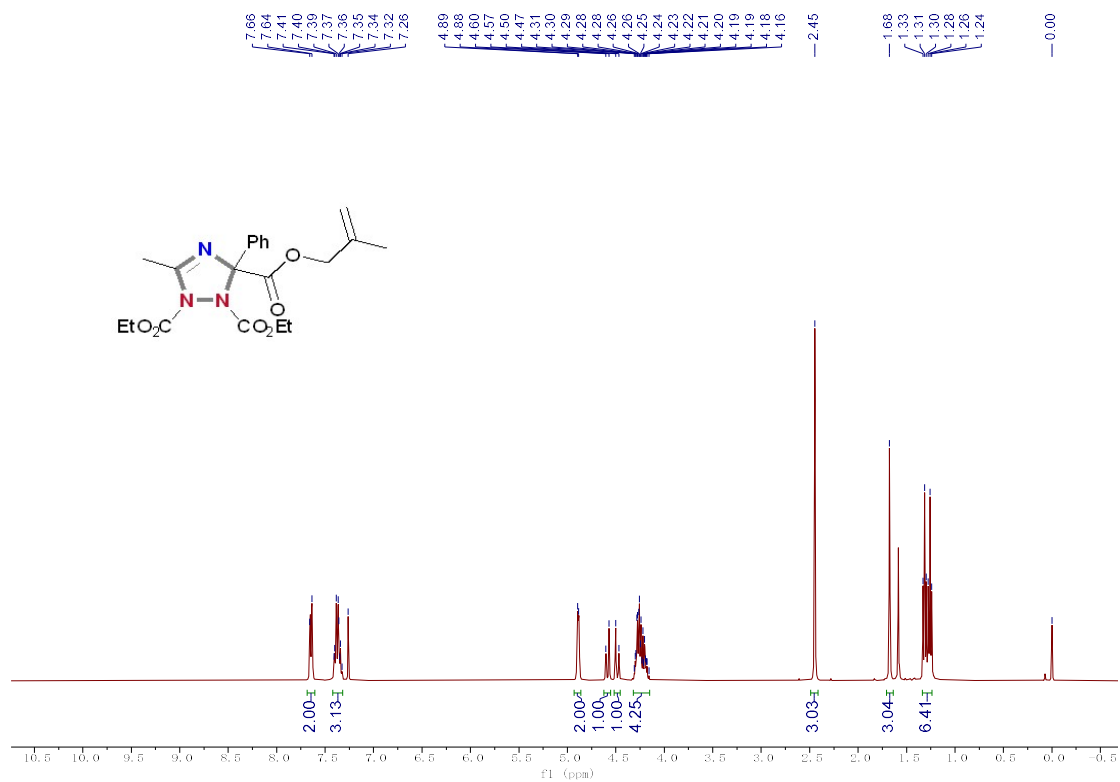

### <sup>13</sup>C NMR (100 MHz) Spectrum of 13p in CDCl<sub>3</sub>

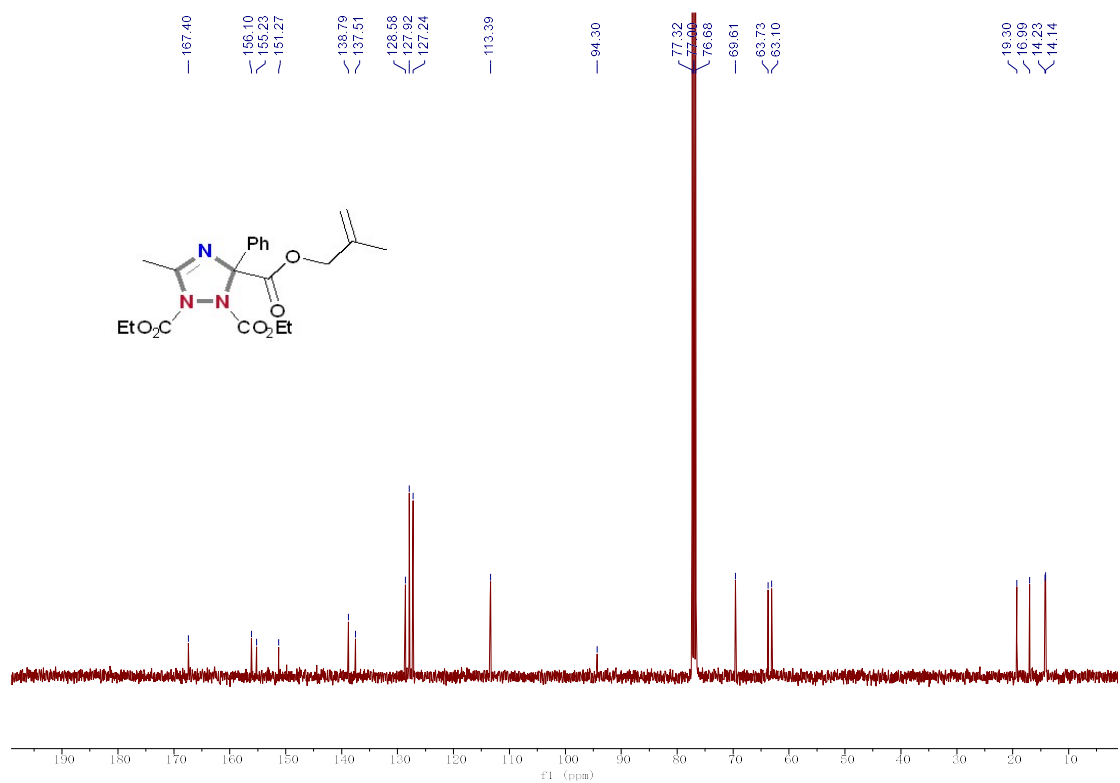

### <sup>1</sup>H NMR (400 MHz) Spectrum of 13q in CDCl<sub>3</sub>

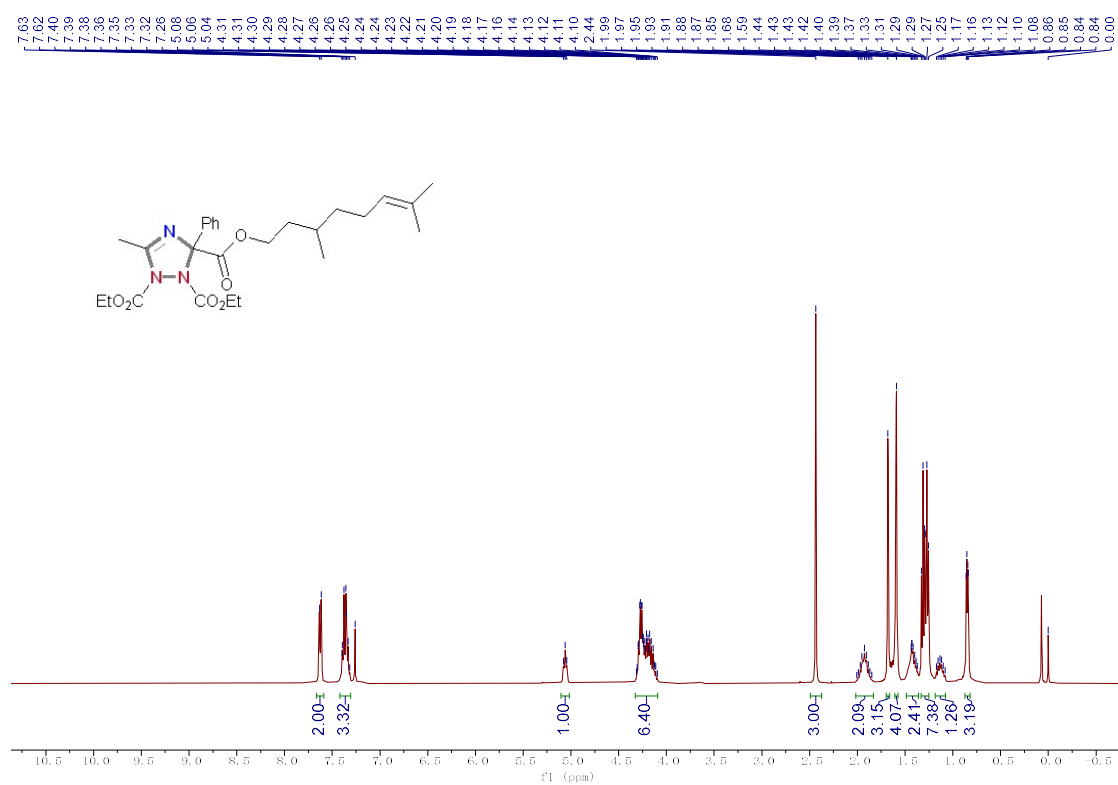

### <sup>13</sup>CNMR (100 MHz) Spectrum of 13q in CDCl<sub>3</sub>

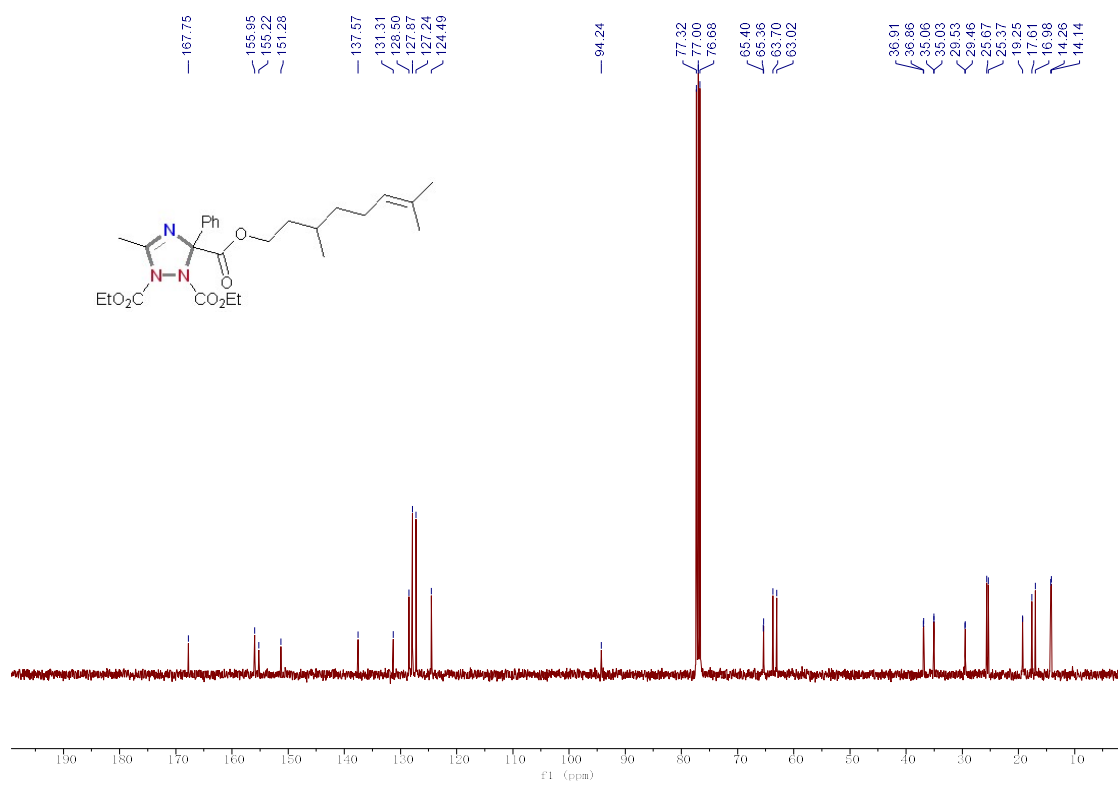

### <sup>1</sup>H NMR (400 MHz) Spectrum of 13r in CDCl<sub>3</sub>

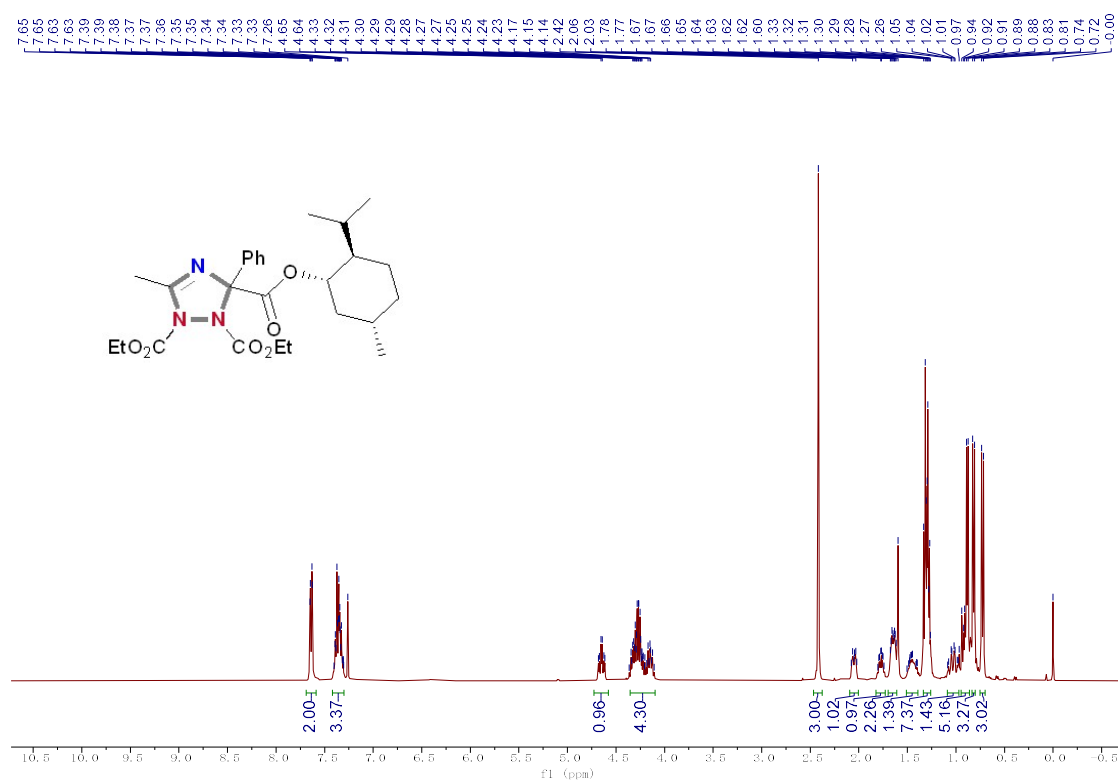

### <sup>13</sup>CNMR (100 MHz) Spectrum of 13r in CDCl<sub>3</sub>

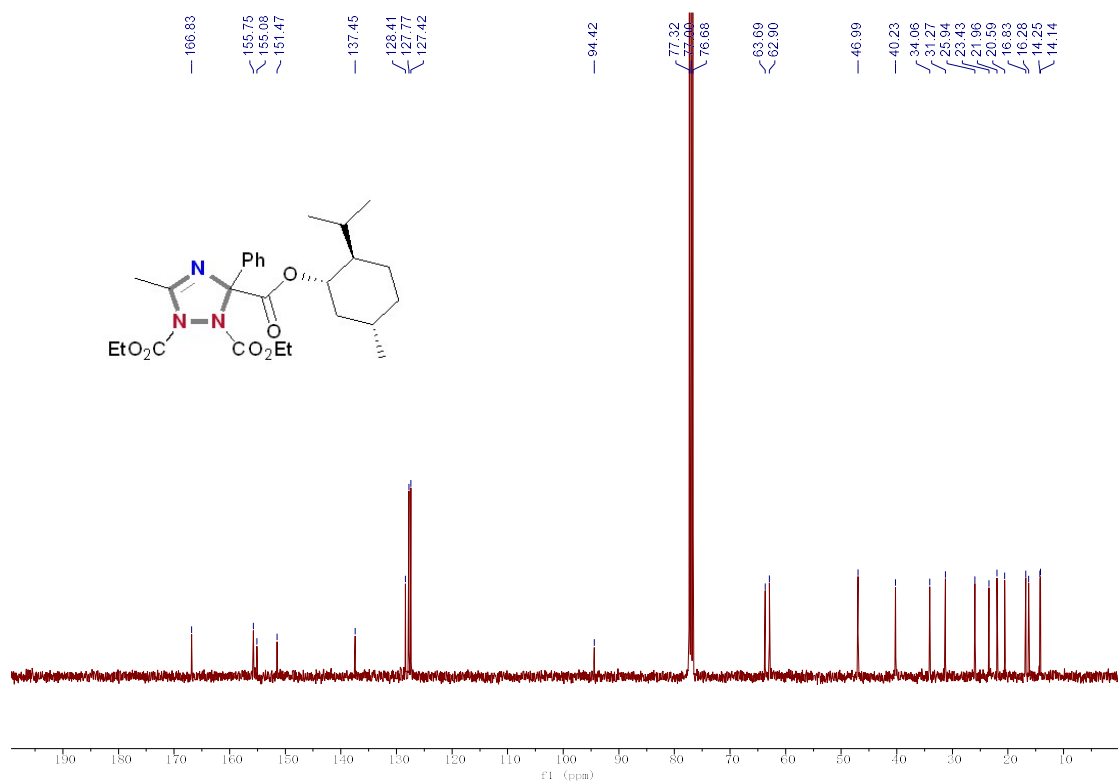

**<sup>1</sup>H NMR (400 MHz) Spectrum of 13s in CDCl<sub>3</sub>**

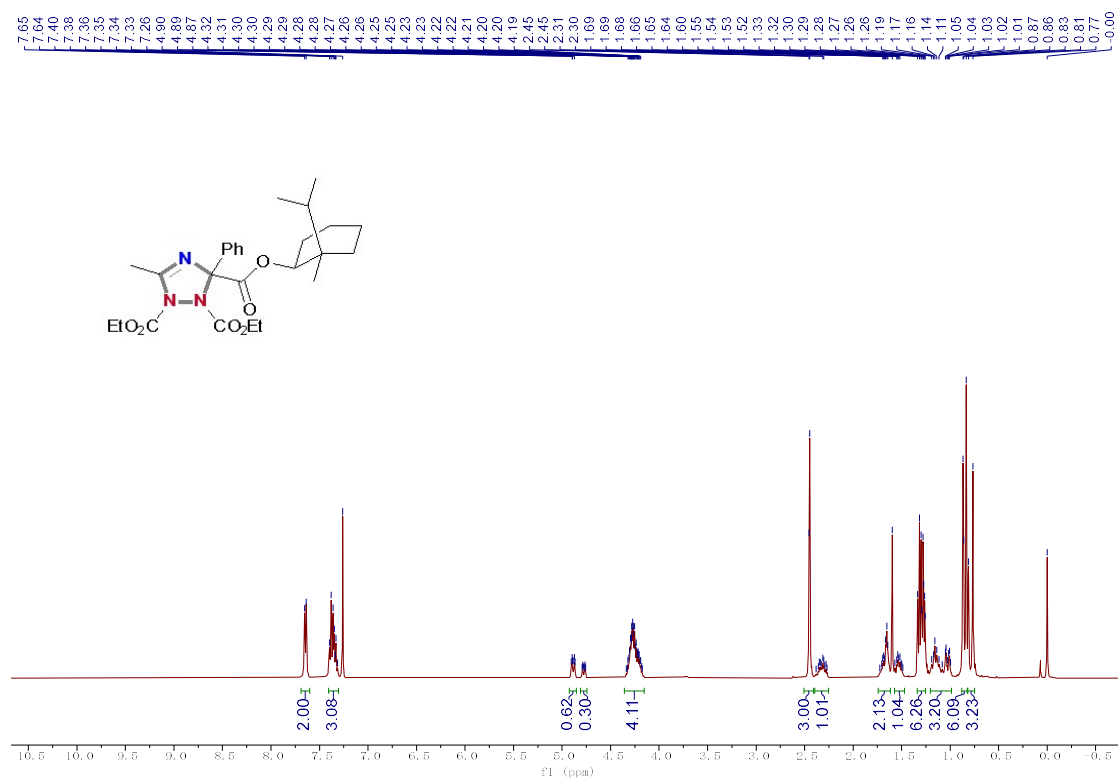

**<sup>13</sup>CNMR (100 MHz) Spectrum of 13s in CDCl<sub>3</sub>**

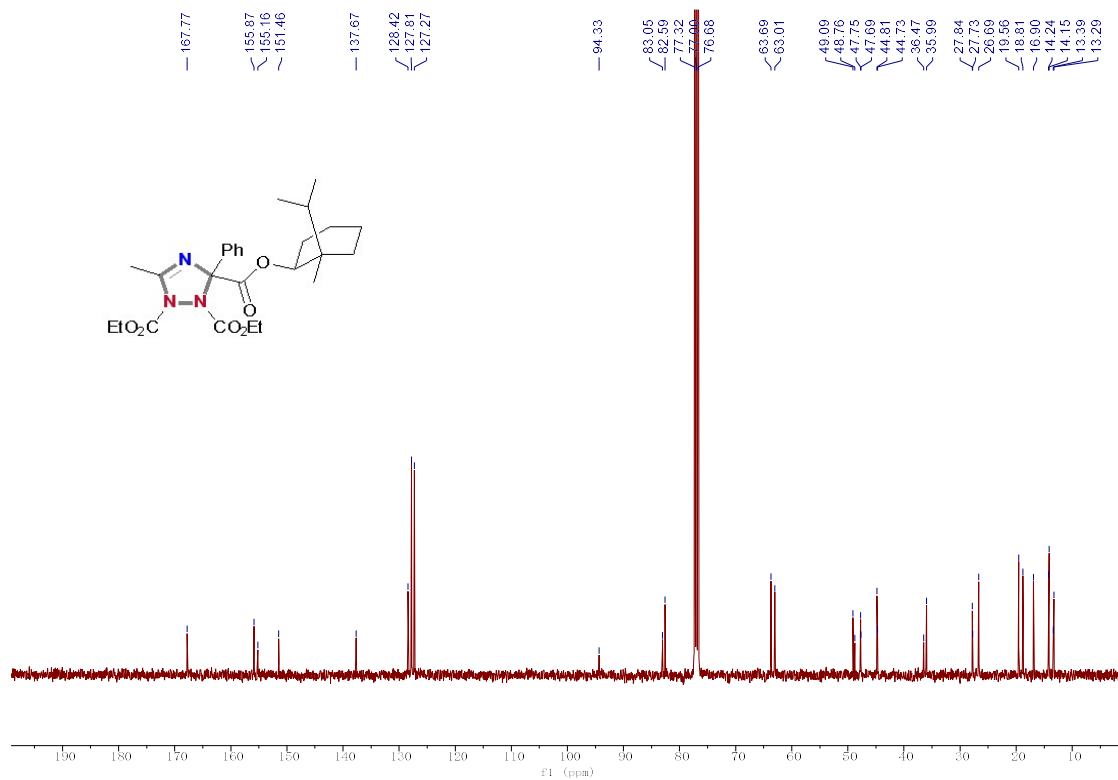

### <sup>1</sup>H NMR (400 MHz) Spectrum of 13t in CDCl<sub>3</sub>

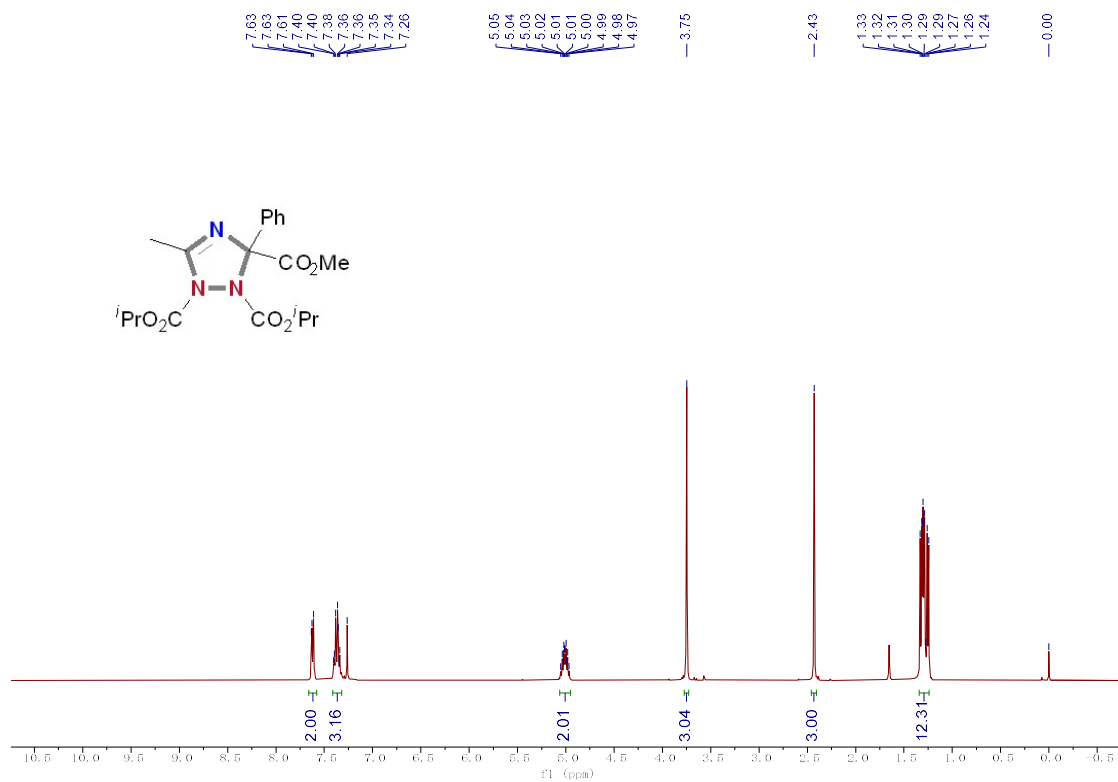

### <sup>13</sup>CNMR (100 MHz) Spectrum of 13t in CDCl<sub>3</sub>

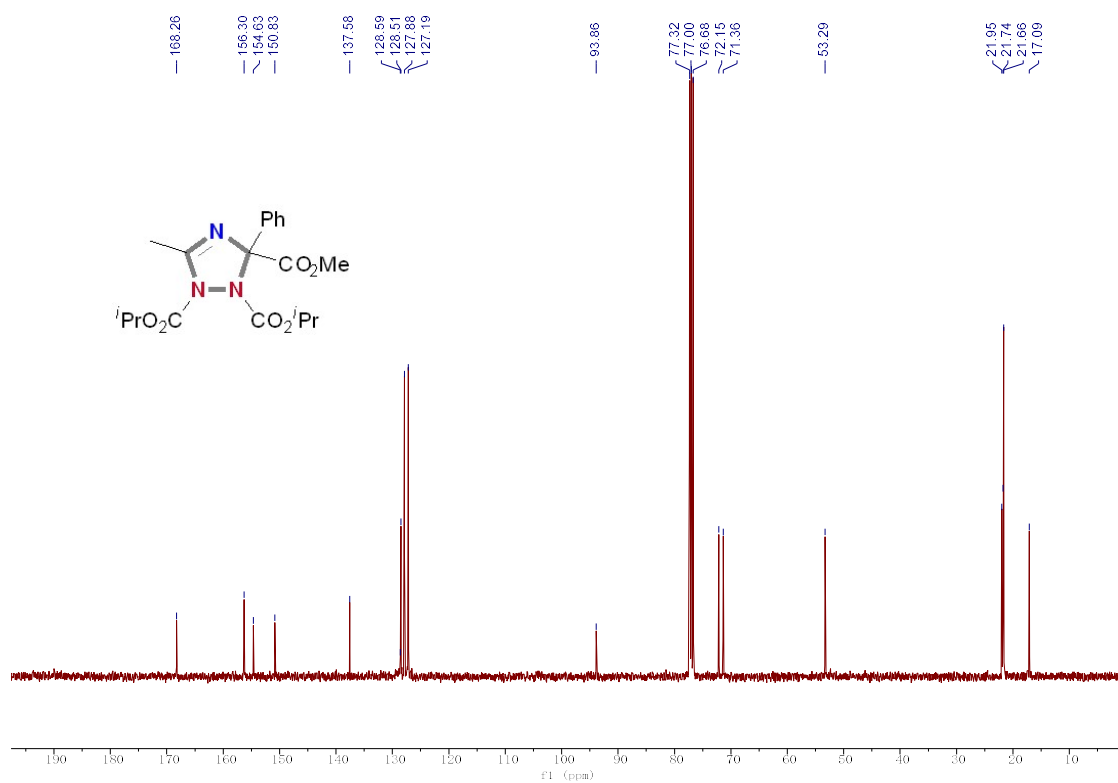



### <sup>1</sup>H NMR (400 MHz) Spectrum of 13u in CDCl<sub>3</sub>

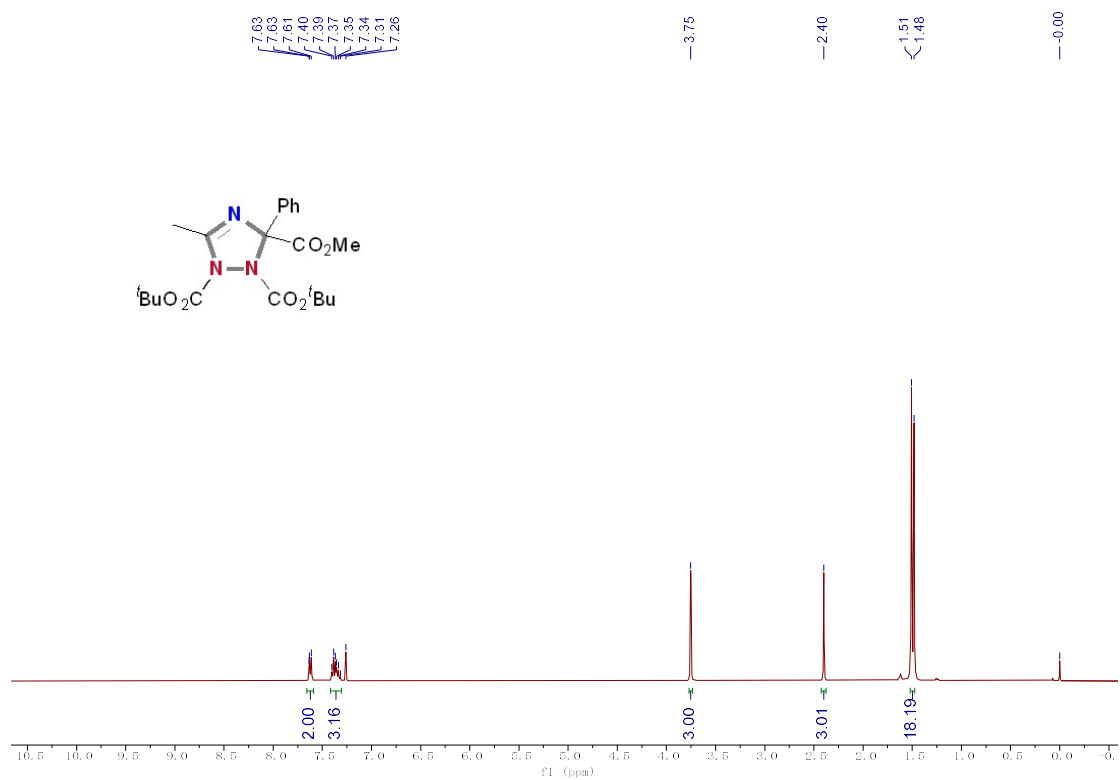

### <sup>13</sup>C NMR (100 MHz) Spectrum of 13u in CDCl<sub>3</sub>

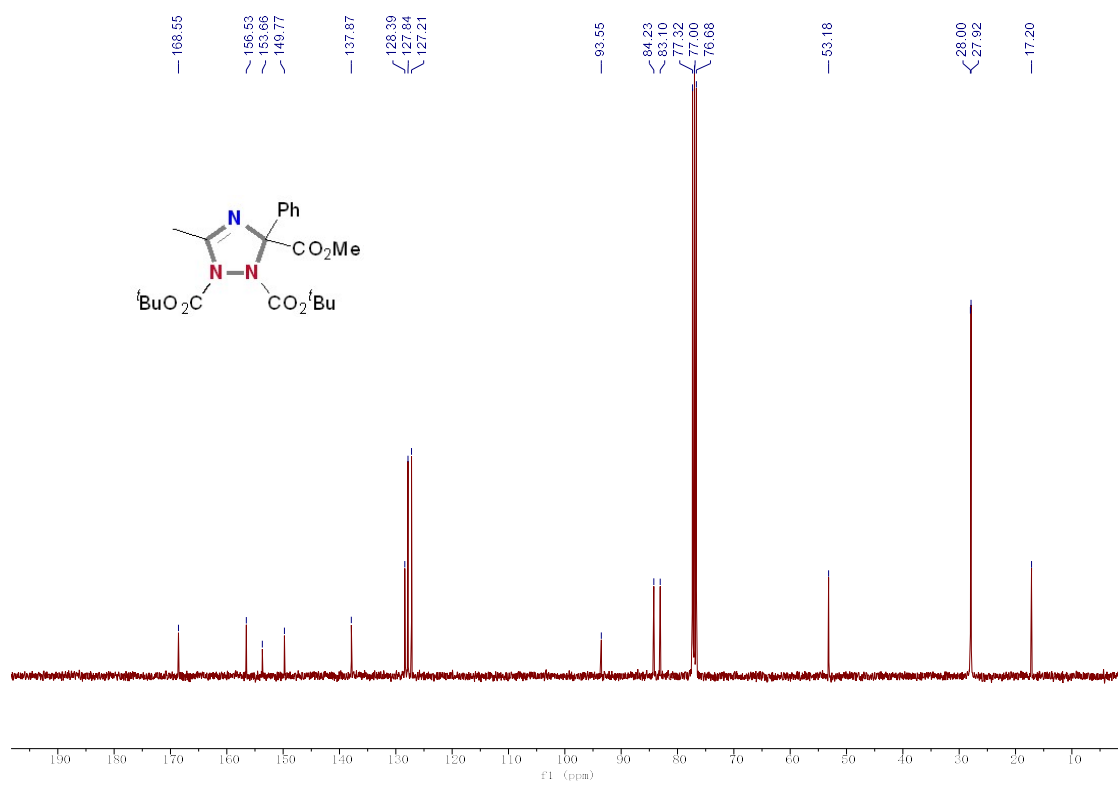

### <sup>1</sup>H NMR (400 MHz) Spectrum of 13v in CDCl<sub>3</sub>

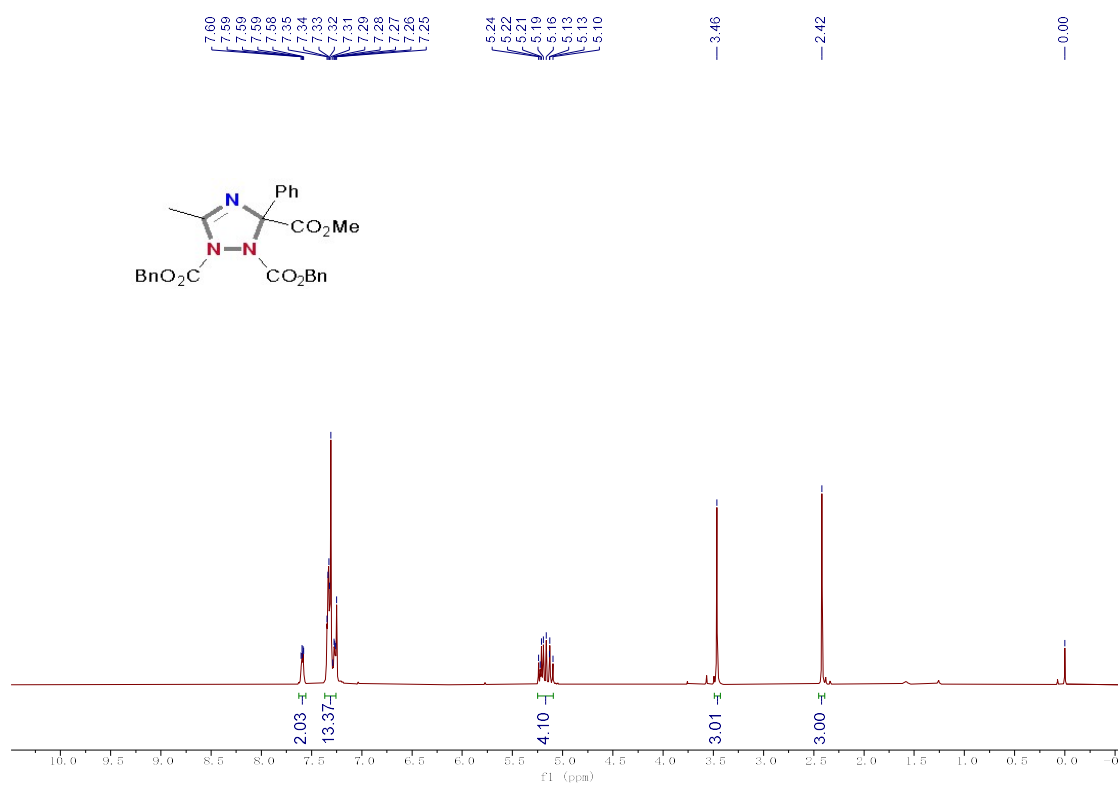

### <sup>13</sup>C NMR (100 MHz) Spectrum of 13v in CDCl<sub>3</sub>

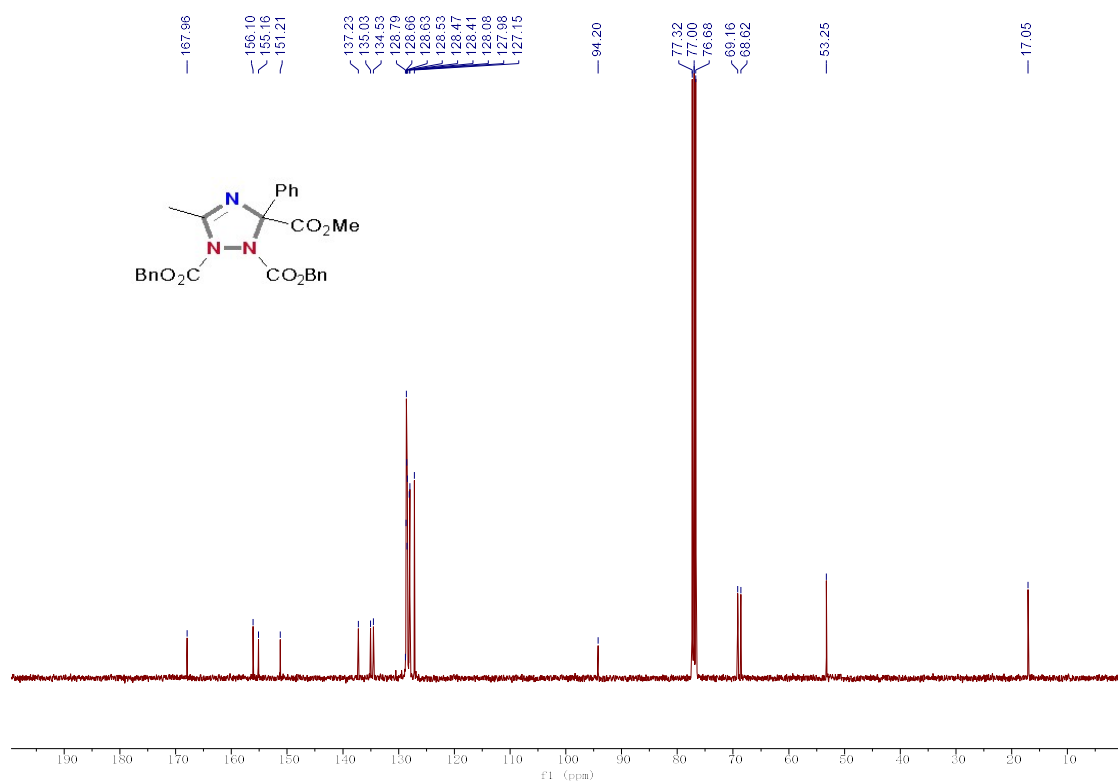

### <sup>1</sup>H NMR (400 MHz) Spectrum of 13w in CDCl<sub>3</sub>

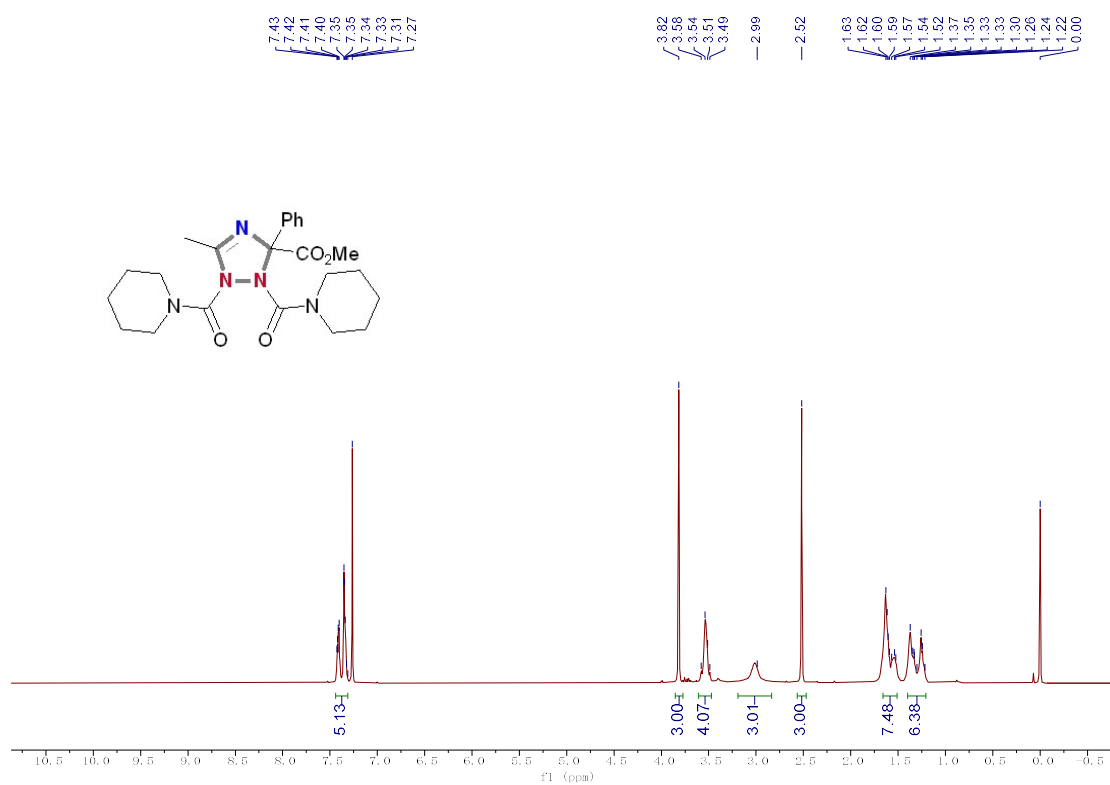

### <sup>13</sup>C NMR (100 MHz) Spectrum of 13w in CDCl<sub>3</sub>

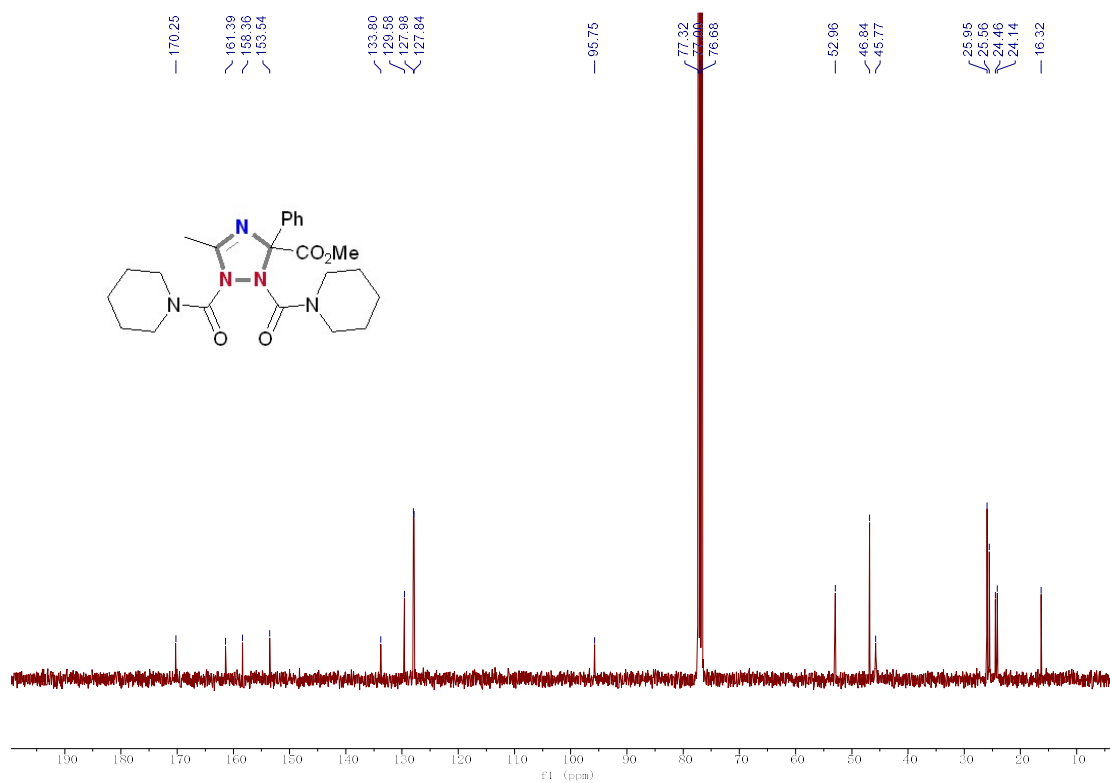

### <sup>1</sup>H NMR (400 MHz) Spectrum of 13x in CDCl<sub>3</sub>

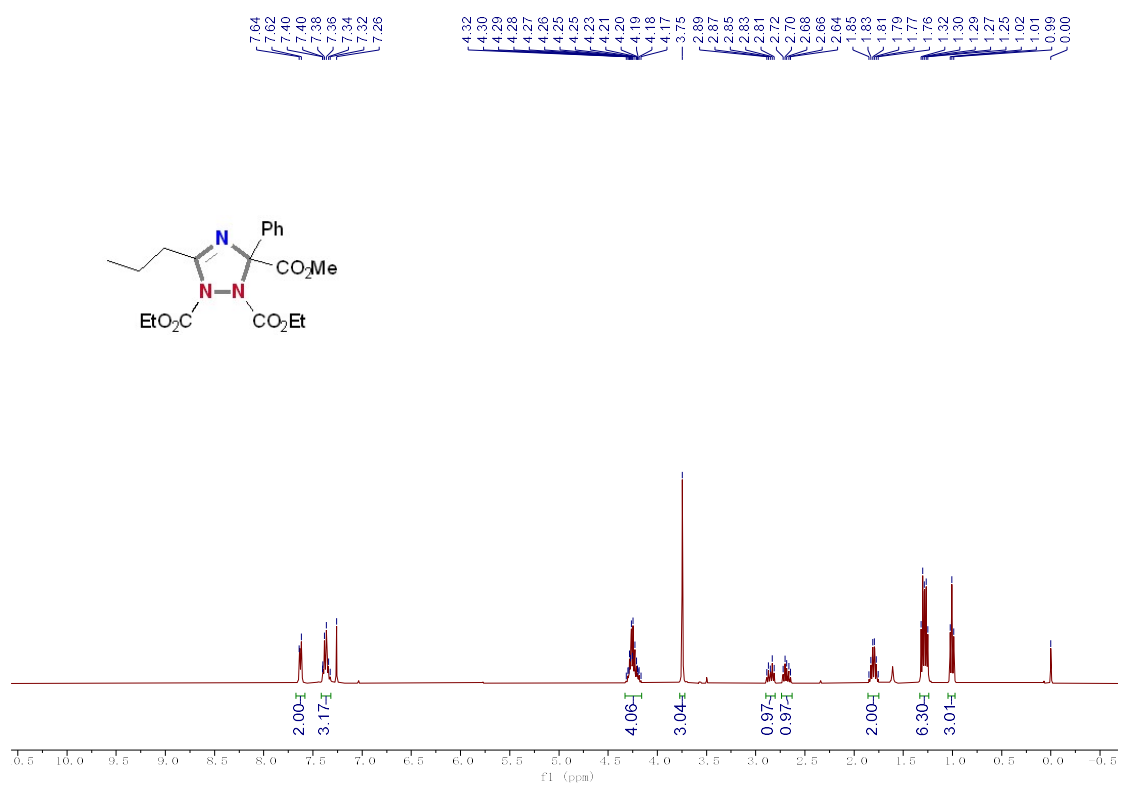

### <sup>13</sup>C NMR (100 MHz) Spectrum of 13x in CDCl<sub>3</sub>

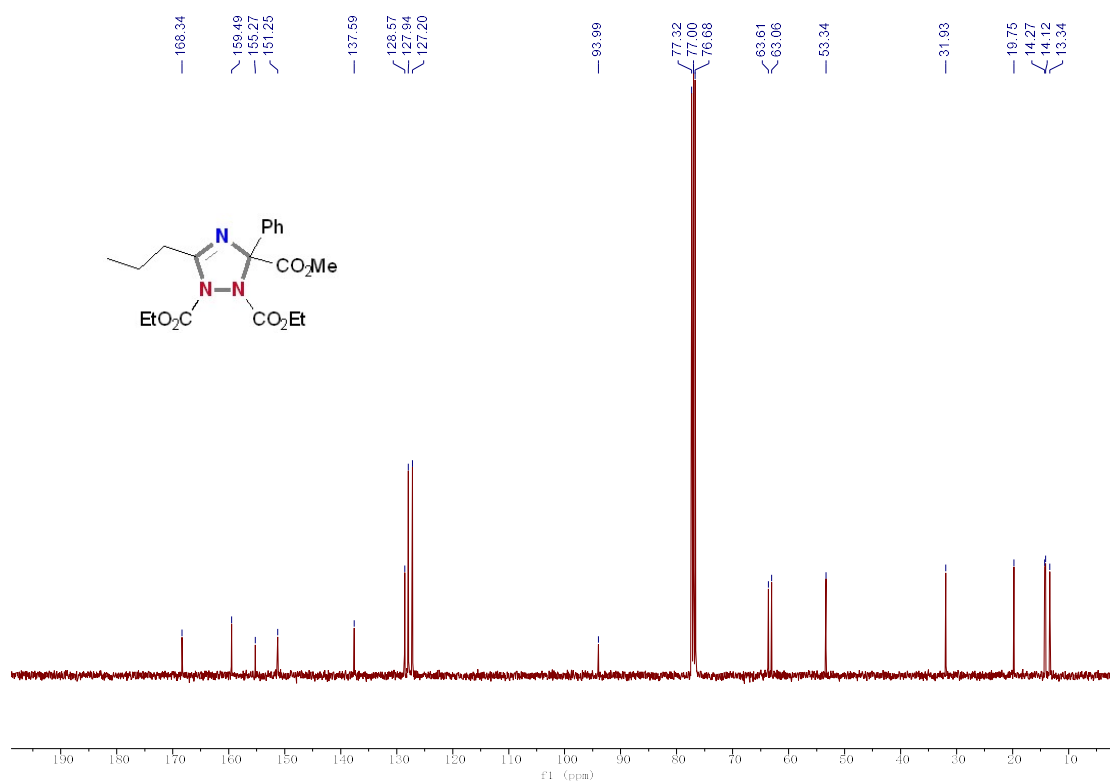

### <sup>1</sup>H NMR (400 MHz) Spectrum of 13y in CDCl<sub>3</sub>

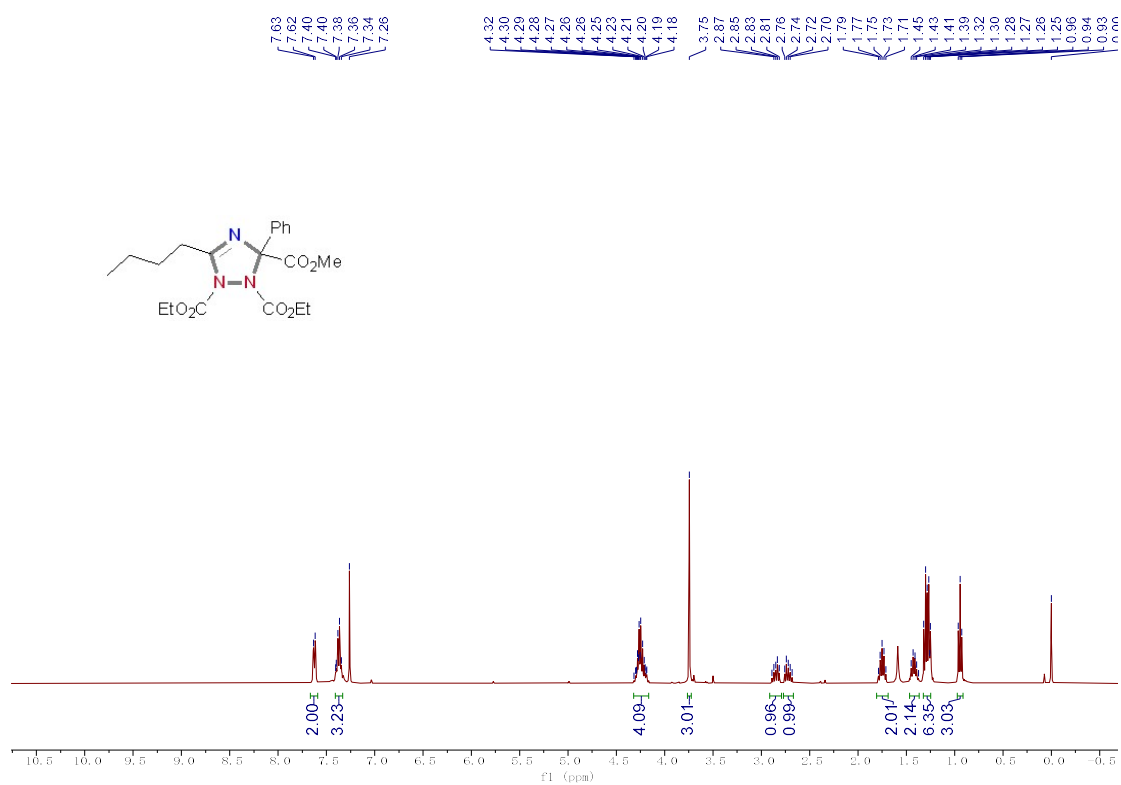

### <sup>13</sup>C NMR (100 MHz) Spectrum of 13y in CDCl<sub>3</sub>

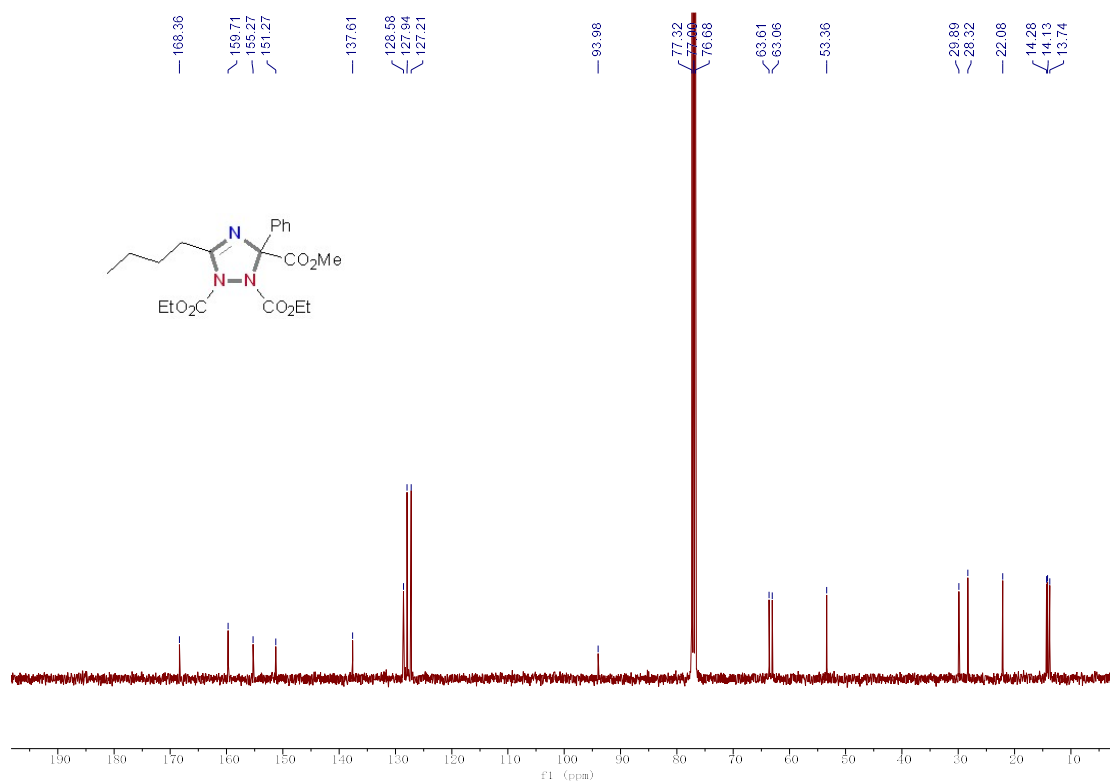

### <sup>1</sup>H NMR (400 MHz) Spectrum of 20 in CDCl<sub>3</sub>

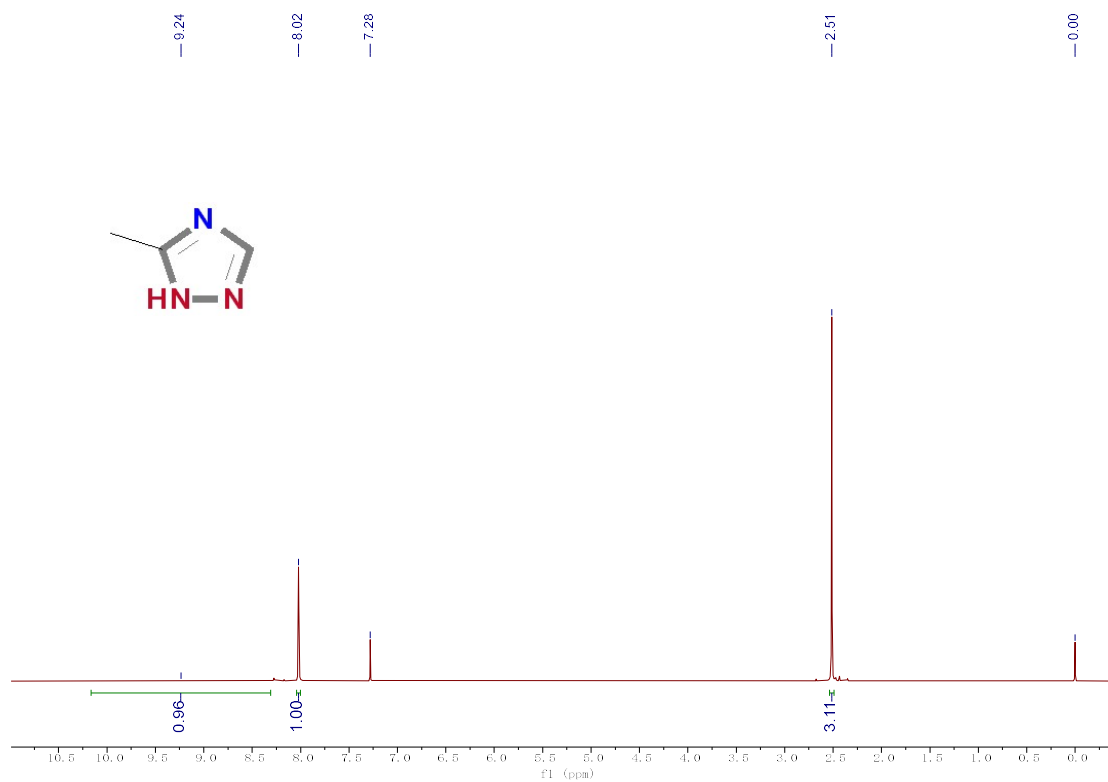

### <sup>13</sup>C NMR (100 MHz) Spectrum of 20 in CDCl<sub>3</sub>

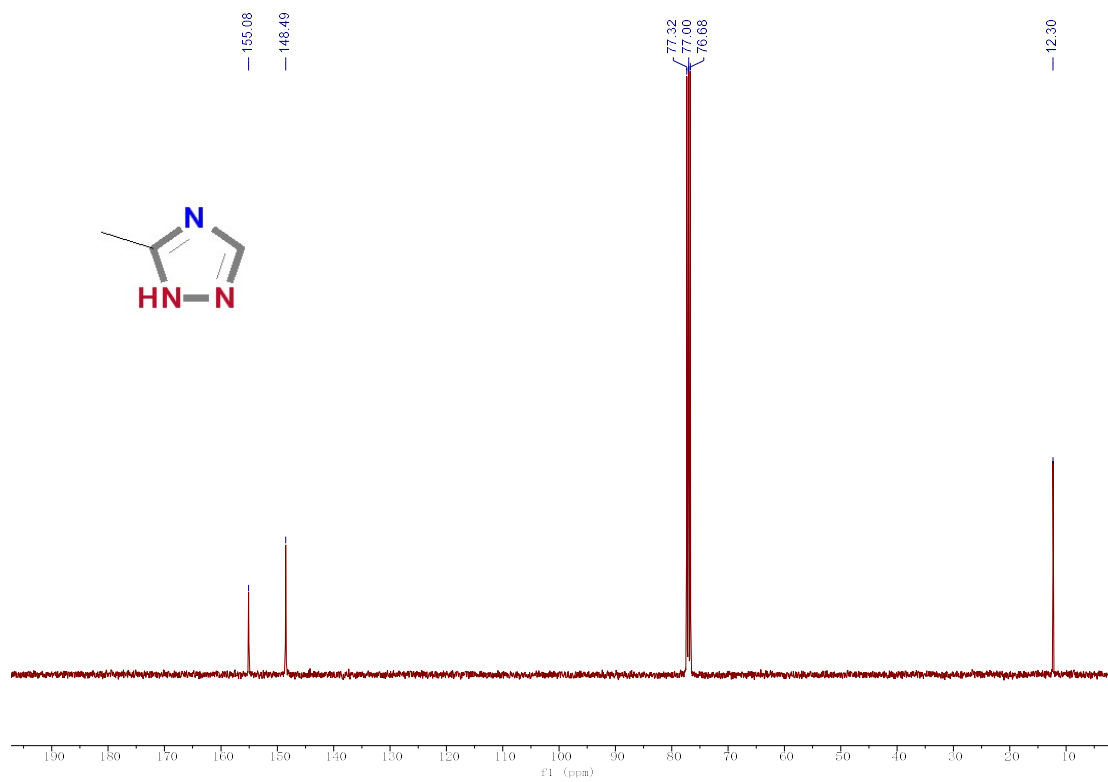

### <sup>1</sup>H NMR (400 MHz) Spectrum of 21 in CDCl<sub>3</sub>

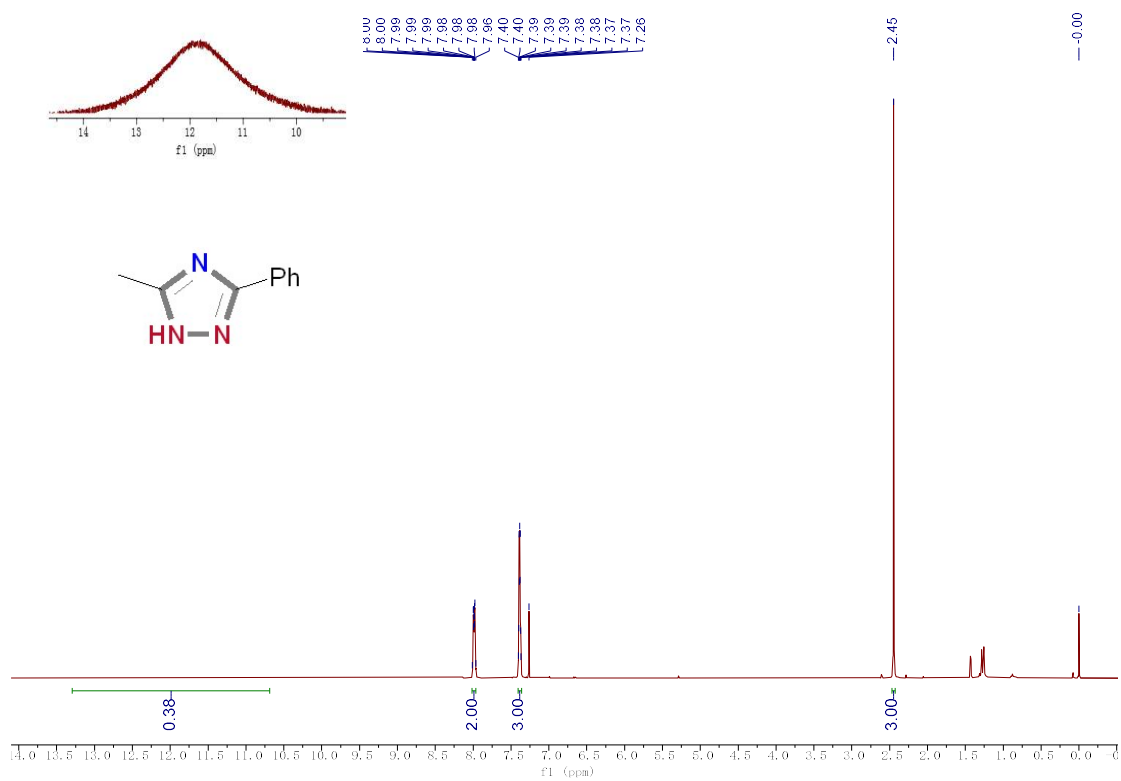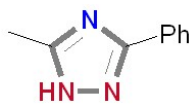

### <sup>13</sup>C NMR (100 MHz) Spectrum of 21 in CDCl<sub>3</sub>

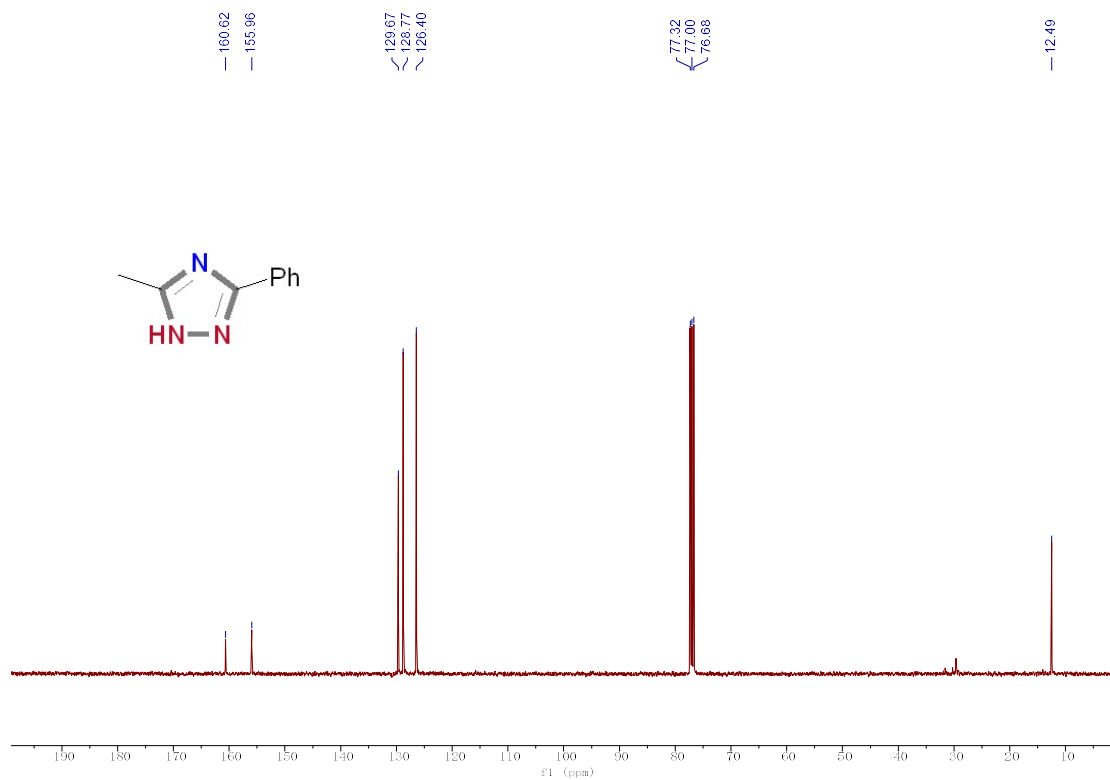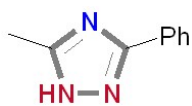

Supplement: d2sc04720a2.pdf [file d2sc04720a2.pdf]
