# Supplementary material for: Photochemical synthesis of 1,2,4-triazolesviaaddition reaction of triplet intermediates to diazoalkanes and azomethine ylide intermediates
Source: Royal Society of Chemistry journal article supplement (doi:10.1039/d2sc04720a), 2022-01-01
Supplement: d2sc04720a1.pdf [file d2sc04720a1.pdf]

# Computational Supporting Information

## Photochemical synthesis of 1,2,4-triazoles via addition reaction of triplet intermediates to diazoalkanes and azomethine ylide intermediates

Bao-Gui Cai,<sup>†a</sup> Ye-Peng Bao,<sup>†a</sup> Chao Pei,<sup>b</sup> Qian Li,<sup>a</sup> Lei Li,<sup>a</sup> Rene M. Koenigs,<sup>\*b</sup> and Jun Xuan<sup>\*a,c</sup>

<sup>a</sup>Anhui Province Key Laboratory of Chemistry for Inorganic/Organic Hybrid Functionalized Materials, College of Chemistry & Chemical Engineering, Anhui University, Hefei, Anhui 230601, People's Republic of China.

<sup>b</sup>RWTH Aachen University, Institute of Organic Chemistry, Landoltweg 1, 52074 Aachen, Germany

<sup>c</sup>Key Laboratory of Structure and Functional Regulation of Hybrid Materials, (Anhui University), Ministry of Education, Hefei, Anhui 230601, People's Republic of China.

<sup>†</sup>denotes equal contribution

\*Correspondence: xuanjun@ahu.edu.cn; rene.koenigs@rwth-aachen.de,

### Table of Contents

|                                                           |     |
|-----------------------------------------------------------|-----|
| 1. Computational Detail                                   | S1  |
| 2. Computed Reaction Pathways                             | S2  |
| 3. Computed Energy of all Stationary Points               | S4  |
| 4. 3D Structures and Coordinates of all Stationary Points | S5  |
| 5. References                                             | S14 |

## 1. Computational Details

All calculations were performed using the Gaussian 16, Revision B.01 package.<sup>1</sup> The (U)M06-2X functional<sup>2</sup> together with Grimme's dispersion correction<sup>3</sup> (denoted (U)M06-2X-D3) and the def2-SVP basis set<sup>4</sup> were applied for the optimization of all stationary points in acetonitrile, in which the solvent effects ( $\epsilon = 35.688$ ) were evaluated by SMD solvation model.<sup>5</sup> Analytical frequency calculations were carried out at the same level of theory in order to confirm each stationary point as either an intermediate (no imaginary frequencies) or a transition state (only one imaginary frequency). Key transition-state structures were confirmed to connect corresponding reactants and products by intrinsic reaction coordinate (IRC) calculations.<sup>6</sup> To improve the calculation accuracy, single point energy calculations using larger def2-TZVPP basis set<sup>4</sup> at the (U)M06-2X-D3 level with SMD solvation model were performed based on the optimized geometries of all species. Standard state concentrations of 1.0 mol/L were used for all species in calculations. The given Gibbs free energies in Table S2 were calculated according to the formula:  $G_{\text{sol}} = \text{TCG} + E_{\text{sol}}$  (kcal/mol). The CYL View software was employed to show the 3D structures of the studied species.<sup>7</sup> Vertical excitations energies were calculated at the TD-M06-2X-D3 level with the def2-TZVPP basis set. The searching for minimal energy crossing points (MECPs) was conducted using a modified version of Harvey's code<sup>8</sup> (sobMECP software)<sup>9</sup> interfaced with Gaussian 16.

## 2. Computed Reaction Pathways

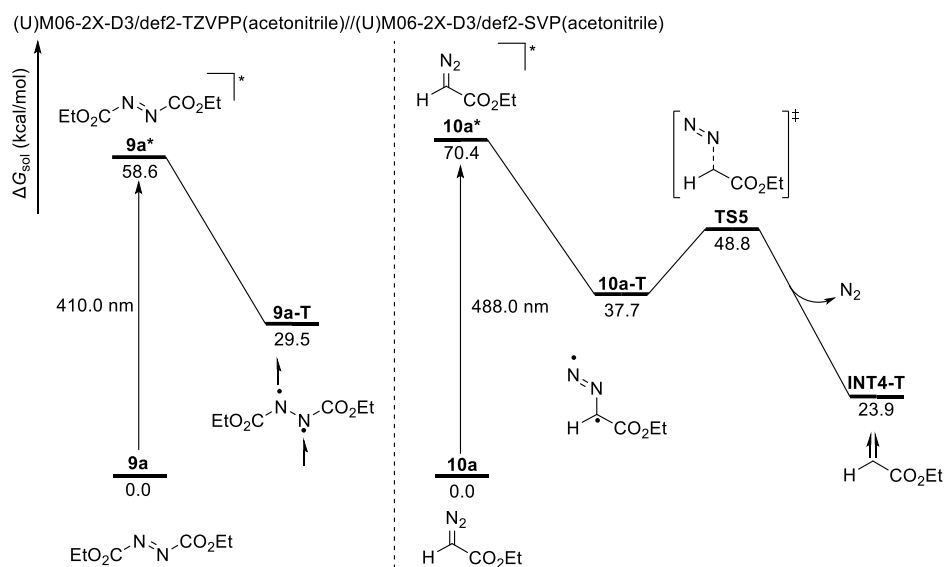

Figure S1. Computational photochemical properties of EDA and DEAD.

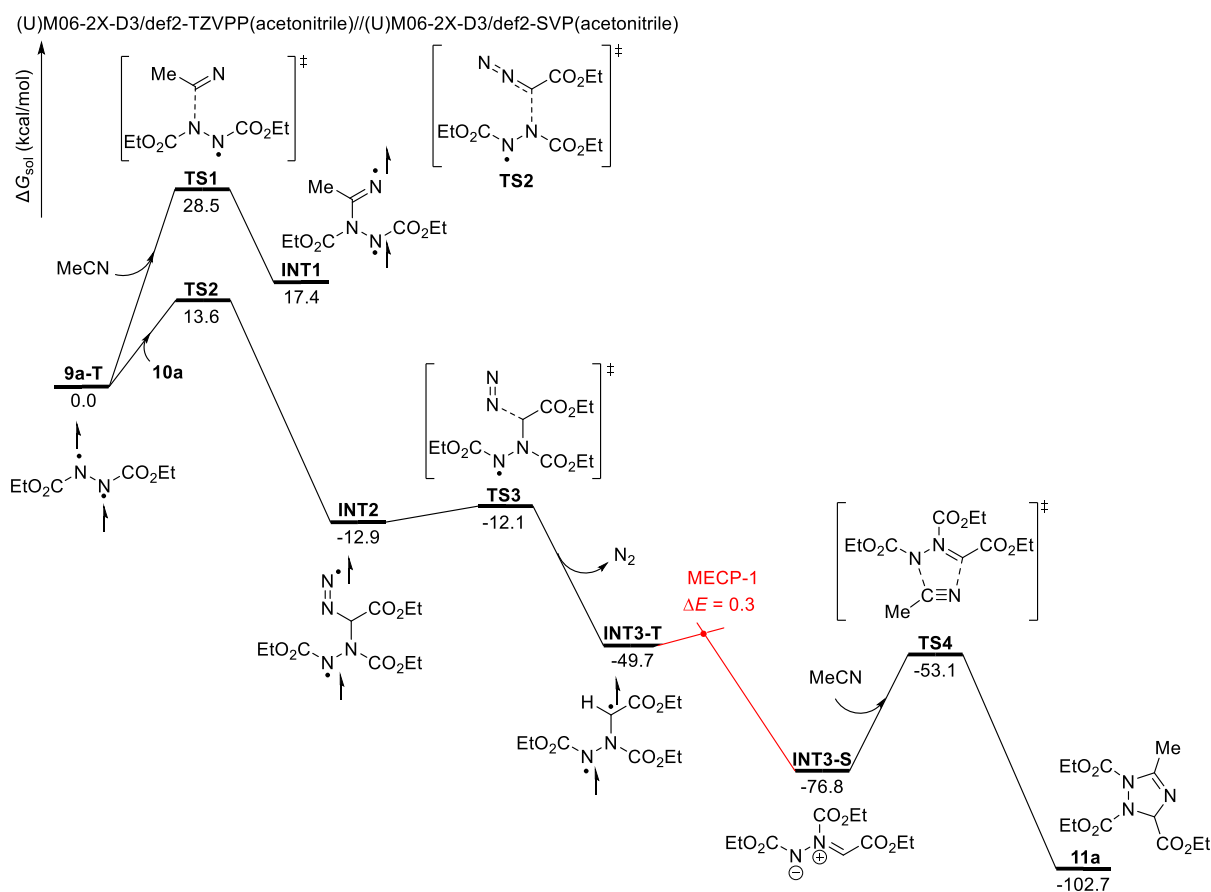

Figure S2. Relative free-energy profile for the reaction from triplet state of DEAD.

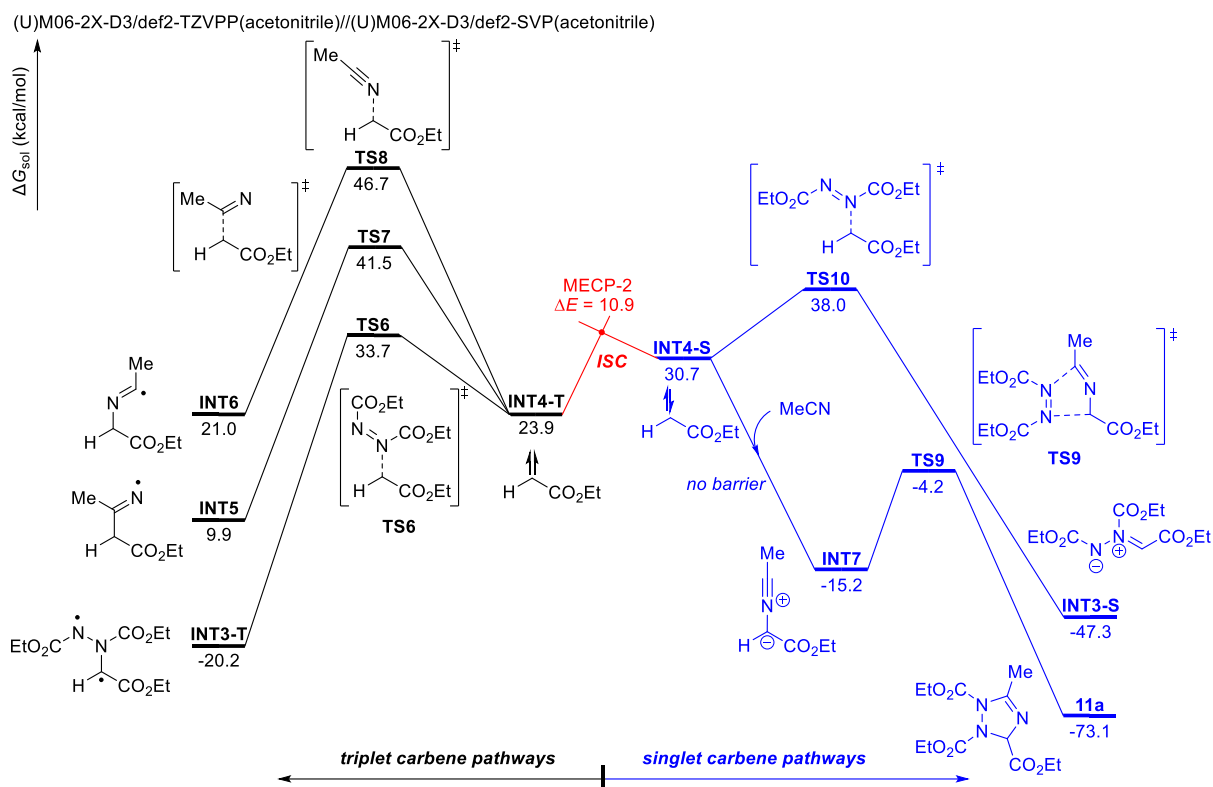

**Figure S3.** Relative free-energy profile for the reaction from free carbene.

**Table S1.** Single point energies ( $E$ ) of MECP

| Name   | $E$ (a.u.)  | $\Delta E$ (kcal/mol) |
|--------|-------------|-----------------------|
| INT3-T | -950.383085 | -                     |
| MECP-1 | -950.382585 | 0.3                   |
| INT4-T | -305.998752 | -                     |
| MECP-2 | -305.981362 | 10.9                  |

### 3. Computed Energy of all Stationary Points

**Table S2.** Calculated energies of all stationary points.

Thermal correction to Gibbs free energies (*TCG*, in Hartree), thermal correction to enthalpies (*TCH*, in Hartree), sum of electronic and thermal free energies (*G*, in Hartree), single point energies in acetonitrile computed at the (U)M06-2X-D3/def2-TZVPP level (*E*, in Hartree), and the total spin-squared operator of open-shell species *S*<sup>2</sup>.

| <b>Name</b>          | <i>TCG</i> /a.u. | <i>TCH</i> /a.u. | <i>G</i> /a.u. | <i>E</i> /a.u. | <i>S</i> <sup>2</sup> |
|----------------------|------------------|------------------|----------------|----------------|-----------------------|
| <b>9a</b>            | 0.129908         | 0.187141         | -644.145194    | -645.033374    | -                     |
| <b>9a-T</b>          | 0.127903         | 0.186466         | -644.103860    | -644.984285    | 2.0099                |
| <b>MeCN</b>          | 0.022521         | 0.050010         | -132.577474    | -132.758347    | -                     |
| <b>TS1</b>           | 0.170183         | 0.236502         | -776.641453    | -777.716925    | 2.0305                |
| <b>INT1</b>          | 0.173640         | 0.239004         | -776.661115    | -777.738132    | 2.0200                |
| <b>10a</b>           | 0.072134         | 0.115368         | -415.389919    | -415.950171    | -                     |
| <b>TS2</b>           | 0.224629         | 0.302828         | -1059.477540   | -1060.937424   | 2.0250                |
| <b>INT2</b>          | 0.227981         | 0.305559         | -1059.522360   | -1060.983032   | 2.0112                |
| <b>TS3</b>           | 0.223129         | 0.302848         | -1059.518698   | -1060.976784   | 2.0178                |
| <b>N<sub>2</sub></b> | -0.012541        | 0.009192         | -109.409372    | -109.530558    | -                     |
| <b>INT3-T</b>        | 0.218294         | 0.292687         | -950.164791    | -951.488859    | 2.0129                |
| <b>INT3-S</b>        | 0.222059         | 0.294539         | -950.205915    | -951.535835    | -                     |
| <b>TS4</b>           | 0.266896         | 0.345978         | -1082.749822   | -1084.275836   | -                     |
| <b>11a</b>           | 0.272057         | 0.349832         | -1082.838061   | -1084.362809   | -                     |
| <b>10a-T</b>         | 0.068716         | 0.113258         | -415.330948    | -415.886663    | 2.0322                |
| <b>TS5</b>           | 0.063461         | 0.110383         | -415.309322    | -415.863686    | 2.0268                |
| <b>INT4-T</b>        | 0.061858         | 0.101093         | -305.936894    | -306.358756    | 2.0118                |
| <b>INT4-S</b>        | 0.061492         | 0.100870         | -305.921696    | -306.347578    | -                     |
| <b>TS6</b>           | 0.215144         | 0.289151         | -950.073755    | -951.399764    | 2.0545                |
| <b>TS7</b>           | 0.100828         | 0.151695         | -438.489337    | -439.105513    | 2.0310                |
| <b>INT5</b>          | 0.106319         | 0.154691         | -438.543666    | -439.161288    | 2.0503                |
| <b>TS8</b>           | 0.097916         | 0.151465         | -438.480740    | -439.094251    | 2.0303                |
| <b>INT6</b>          | 0.104061         | 0.154628         | -438.526100    | -439.141405    | 2.0301                |
| <b>INT7</b>          | 0.107005         | 0.156076         | -438.583535    | -439.201929    | -                     |
| <b>TS9</b>           | 0.265098         | 0.344297         | -1082.721511   | -1084.245982   | -                     |
| <b>TS10</b>          | 0.213249         | 0.289153         | -950.064130    | -951.391077    | -                     |

## 4. 3D Structures and Coordinates of all Stationary Points

9a

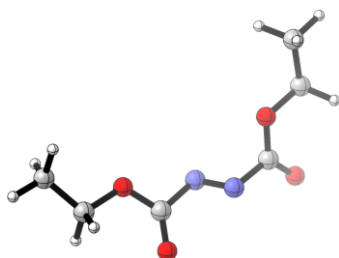

|   |             |             |             |
|---|-------------|-------------|-------------|
| N | -0.31088700 | -0.47190100 | -0.37837100 |
| N | 0.48170100  | -1.01368100 | 0.38633900  |
| C | 1.85388100  | -0.86577800 | -0.03368400 |
| C | -1.69398400 | -0.69767100 | 0.02132500  |
| O | -2.11047800 | -1.73701100 | 0.43629100  |
| O | 2.47196100  | -1.80317300 | -0.44264200 |
| O | 2.27642700  | 0.35670500  | 0.16682400  |
| C | 3.66808600  | 0.61393200  | -0.12944900 |
| H | 3.82892200  | 0.42446300  | -1.19996400 |
| H | 4.27690100  | -0.09954600 | 0.44346600  |
| C | 3.95943600  | 2.04321700  | 0.24548700  |
| H | 5.01235300  | 2.26657500  | 0.02725600  |
| H | 3.32965600  | 2.73402500  | -0.33177500 |
| H | 3.78239300  | 2.20915300  | 1.31702900  |
| C | -3.77305000 | 0.37339500  | 0.11570900  |
| H | -3.87624600 | 0.10950500  | 1.17787600  |
| H | -4.24319900 | -0.42010600 | -0.48268700 |
| O | -2.36694500 | 0.40293700  | -0.20769100 |
| C | -4.34485600 | 1.73269400  | -0.19119300 |
| H | -4.22231700 | 1.97613700  | -1.25552200 |
| H | -5.41717100 | 1.73645600  | 0.04592300  |
| H | -3.85177500 | 2.50800900  | 0.41120300  |

9a-T

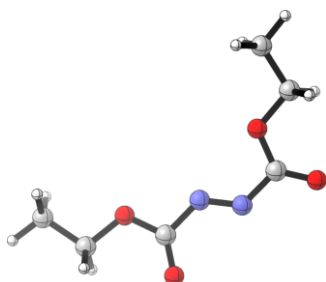

|   |             |             |             |
|---|-------------|-------------|-------------|
| N | -0.32230400 | -0.41695900 | -0.10387300 |
| N | 0.61566400  | -1.22245800 | -0.08381100 |
| C | 1.98794700  | -0.94571800 | -0.03211600 |
| C | -1.69283200 | -0.70330900 | 0.01153100  |
| O | -2.13519500 | -1.81061700 | 0.13862000  |
| O | 2.80744700  | -1.82181300 | -0.02017500 |
| O | 2.22147400  | 0.35615300  | -0.00399200 |
| C | 3.60854600  | 0.74412400  | 0.03903900  |

|   |             |             |             |
|---|-------------|-------------|-------------|
| H | 4.11539900  | 0.31876300  | -0.83892500 |
| H | 4.06316700  | 0.30898100  | 0.94055200  |
| C | 3.66009800  | 2.25012800  | 0.04853300  |
| H | 4.70794600  | 2.57752100  | 0.08145800  |
| H | 3.19428700  | 2.66147800  | -0.85758800 |
| H | 3.14106100  | 2.65237300  | 0.92944800  |
| C | -3.80043000 | 0.31091900  | 0.05117200  |
| H | -4.04355700 | -0.17645500 | 1.00630200  |
| H | -4.15493700 | -0.33659900 | -0.76370800 |
| O | -2.36814200 | 0.42531100  | -0.04930500 |
| C | -4.37790600 | 1.69964200  | -0.03865500 |
| H | -4.11685600 | 2.16899700  | -0.99717900 |
| H | -5.47218300 | 1.64324300  | 0.03529700  |
| H | -4.00505900 | 2.33062600  | 0.77991800  |

MeCN

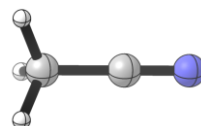

|   |             |             |             |
|---|-------------|-------------|-------------|
| C | 0.00000000  | 0.00000000  | -1.17783800 |
| H | 0.00000000  | 1.03373300  | -1.54589400 |
| H | -0.89523900 | -0.51686600 | -1.54589400 |
| H | 0.89523900  | -0.51686600 | -1.54589400 |
| C | 0.00000000  | 0.00000000  | 0.27924200  |
| N | 0.00000000  | 0.00000000  | 1.43275100  |

TS1

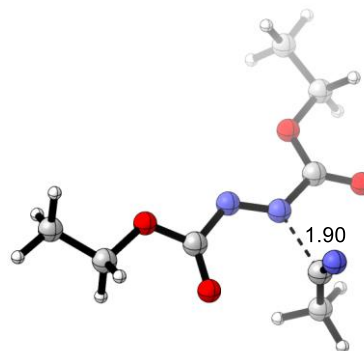

|   |             |             |             |
|---|-------------|-------------|-------------|
| N | 0.36729000  | 0.32757800  | 0.02792000  |
| N | -0.55576500 | -0.53018100 | -0.08694000 |
| C | -1.93183200 | -0.21873400 | -0.07561500 |
| C | 1.70308800  | -0.07030800 | 0.07828000  |
| O | 2.09066200  | -1.20331000 | 0.22950400  |
| O | -2.76758300 | -1.07927300 | -0.13377300 |
| O | -2.13813500 | 1.07814100  | 0.00618000  |
| C | -3.51873100 | 1.49556500  | 0.03206900  |
| H | -4.00397900 | 1.03072400  | 0.90204800  |
| H | -4.01065000 | 1.12050600  | -0.87644100 |

|   |             |             |             |
|---|-------------|-------------|-------------|
| C | -3.53700900 | 3.00009400  | 0.10739900  |
| H | -4.57804200 | 3.34930800  | 0.12944900  |
| H | -3.03166300 | 3.35120300  | 1.01757700  |
| H | -3.03991100 | 3.43983800  | -0.76820400 |
| C | 3.89119500  | 0.76242300  | 0.04491000  |
| H | 4.17325500  | 0.06413200  | -0.75654700 |
| H | 4.11681800  | 0.28086800  | 1.00765200  |
| O | 2.47595800  | 0.99694500  | -0.02848100 |
| C | 4.58561100  | 2.09275500  | -0.09678300 |
| H | 4.28773500  | 2.77571700  | 0.71083000  |
| H | 5.67263900  | 1.94470500  | -0.04498300 |
| H | 4.34286200  | 2.55789300  | -1.06226300 |
| C | -0.38732800 | -2.90301100 | 1.10278600  |
| H | -1.37169400 | -2.65965500 | 1.52255800  |
| H | 0.39899800  | -2.41941900 | 1.69389700  |
| H | -0.24130100 | -3.98984400 | 1.09399000  |
| C | -0.32099200 | -2.40584700 | -0.28878700 |
| N | -0.22670900 | -2.61220100 | -1.45277400 |

### INT1

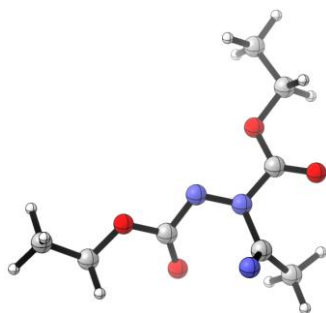

|   |             |             |             |
|---|-------------|-------------|-------------|
| N | 0.31676500  | -0.38349800 | 0.11861000  |
| N | -0.55344800 | 0.60081000  | 0.11764400  |
| C | -1.94369400 | 0.30280600  | 0.17053100  |
| C | 1.60684900  | -0.04163900 | -0.29956900 |
| O | 1.88651000  | 0.88049900  | -1.02781400 |
| O | -2.75085600 | 1.16307900  | 0.39527600  |
| O | -2.17838900 | -0.96425100 | -0.05175900 |
| C | -3.56268500 | -1.37060100 | 0.00528300  |
| H | -4.11863100 | -0.80387100 | -0.75479200 |
| H | -3.95936800 | -1.10203400 | 0.99445400  |
| C | -3.61126500 | -2.85528100 | -0.24360900 |
| H | -4.65527900 | -3.19402200 | -0.20701300 |
| H | -3.19979800 | -3.09853000 | -1.23282100 |
| H | -3.04111900 | -3.39765300 | 0.52308900  |
| C | 3.83281300  | -0.76781200 | -0.24180900 |
| H | 4.16874700  | 0.23472100  | 0.06079900  |
| H | 3.88174600  | -0.82296900 | -1.33923300 |
| O | 2.46516600  | -0.93436300 | 0.16349700  |
| C | 4.64324000  | -1.85637600 | 0.41439300  |
| H | 4.28933100  | -2.84837800 | 0.10105600  |
| H | 5.69719800  | -1.75427600 | 0.12274300  |

|   |             |             |             |
|---|-------------|-------------|-------------|
| H | 4.57604300  | -1.78544700 | 1.50891600  |
| C | -0.57284600 | 2.98486800  | -0.73950700 |
| H | -1.65665600 | 2.95186300  | -0.90387700 |
| H | -0.05159600 | 2.69616400  | -1.66261700 |
| H | -0.26972800 | 3.99377800  | -0.43770300 |
| C | -0.18567800 | 2.00093900  | 0.32230000  |
| N | 0.48229200  | 2.26690400  | 1.34450700  |

### 10a

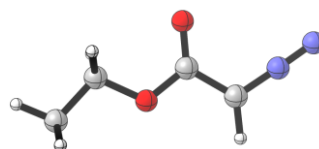

|   |             |             |             |
|---|-------------|-------------|-------------|
| C | -1.29481200 | -0.80168800 | -0.00014300 |
| C | -0.22218300 | 0.18934900  | -0.00004000 |
| O | -0.37928800 | 1.39492800  | 0.00002400  |
| O | 0.97340300  | -0.42068200 | 0.00003700  |
| C | 2.13667900  | 0.43015000  | 0.00017900  |
| H | 2.10352000  | 1.08094900  | -0.88833100 |
| H | 2.10335200  | 1.08089000  | 0.88872700  |
| N | -2.52309000 | -0.36063200 | -0.00019700 |
| N | -3.58002400 | 0.04507300  | -0.00024600 |
| H | -1.14913500 | -1.88188900 | -0.00017700 |
| C | 3.36009400  | -0.45657000 | 0.00026100  |
| H | 4.26797000  | 0.16663400  | 0.00039400  |
| H | 3.38214800  | -1.09959500 | 0.89431900  |
| H | 3.38234500  | -1.09949900 | -0.89386200 |

### TS2

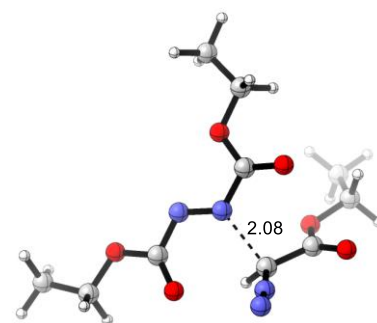

|   |             |             |             |
|---|-------------|-------------|-------------|
| N | -1.29126900 | 0.72653300  | 0.12611400  |
| N | -0.17710000 | 0.16120900  | 0.42655100  |
| C | 0.93995900  | 0.92395900  | 0.77464200  |
| C | -2.39503500 | -0.09826100 | -0.01462100 |
| O | -2.46036600 | -1.28119500 | 0.25371600  |
| O | 1.93849800  | 0.41209100  | 1.22181500  |
| O | 0.78249600  | 2.21947700  | 0.55949600  |
| C | 1.89647900  | 3.05630700  | 0.91192600  |
| H | 2.77767900  | 2.72739100  | 0.34210500  |
| H | 2.11478800  | 2.91869400  | 1.98082300  |
| C | 1.51777000  | 4.47988000  | 0.59177600  |

|   |             |             |             |
|---|-------------|-------------|-------------|
| H | 2.35079500  | 5.14733600  | 0.85060700  |
| H | 1.29999100  | 4.59319300  | -0.47934500 |
| H | 0.63324700  | 4.78628700  | 1.16725200  |
| C | -4.65518700 | -0.09222500 | -0.64030500 |
| H | -4.95569800 | -0.52309400 | 0.32641800  |
| H | -4.49376400 | -0.92559200 | -1.34036500 |
| O | -3.42196300 | 0.61406700  | -0.46844500 |
| C | -5.67869800 | 0.88594400  | -1.16035900 |
| H | -5.36036500 | 1.30612100  | -2.12467600 |
| H | -6.63920200 | 0.37283700  | -1.30399500 |
| H | -5.82677100 | 1.70969000  | -0.44812400 |
| C | 0.24554200  | -1.84175500 | 0.05689600  |
| C | 1.73075400  | -1.86727400 | -0.12673400 |
| O | 2.48570500  | -2.49760100 | 0.56149000  |
| O | 2.05821600  | -1.12217000 | -1.16750200 |
| C | 3.46467700  | -0.92145700 | -1.38415700 |
| H | 3.89763700  | -0.53713700 | -0.44930900 |
| H | 3.92911900  | -1.89345400 | -1.60489300 |
| N | -0.18188100 | -2.55539900 | 1.09059900  |
| N | -0.55953500 | -3.03979500 | 2.03221200  |
| H | -0.42033800 | -1.85447300 | -0.80520900 |
| C | 3.61857000  | 0.05278900  | -2.52388400 |
| H | 4.68574000  | 0.22981700  | -2.71391800 |
| H | 3.16225500  | -0.34403700 | -3.44142200 |
| H | 3.14370500  | 1.01378700  | -2.27991900 |

### INT2

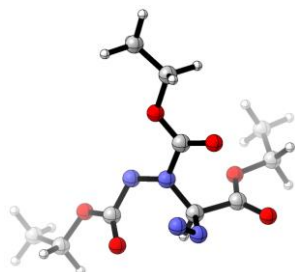

|   |             |             |             |
|---|-------------|-------------|-------------|
| N | 1.11690800  | 0.58458600  | 0.13256400  |
| N | 0.01233000  | 0.12020200  | -0.40635100 |
| C | -1.09987500 | 0.99473300  | -0.55053200 |
| C | 2.29766400  | -0.09072500 | -0.18068900 |
| O | 2.47498900  | -0.78441800 | -1.15601800 |
| O | -2.12117500 | 0.59586400  | -1.04544300 |
| O | -0.85235200 | 2.19777200  | -0.10948100 |
| C | -1.93071400 | 3.15125800  | -0.23394900 |
| H | -2.79981800 | 2.75867400  | 0.31240500  |
| H | -2.19739000 | 3.22971800  | -1.29714700 |
| C | -1.44646300 | 4.46078100  | 0.33045100  |
| H | -2.24769800 | 5.20737000  | 0.24870100  |
| H | -1.17646300 | 4.35279600  | 1.38988700  |
| H | -0.57177400 | 4.82519300  | -0.22551200 |
| C | 4.52508800  | -0.35186400 | 0.49638000  |

|   |             |             |             |
|---|-------------|-------------|-------------|
| H | 4.89913900  | 0.00822200  | -0.47323500 |
| H | 4.43315400  | -1.44620100 | 0.43728300  |
| O | 3.22013100  | 0.20683300  | 0.71738400  |
| C | 5.40968400  | 0.07941900  | 1.63808400  |
| H | 5.01531700  | -0.28669600 | 2.59616100  |
| H | 6.41747200  | -0.33329000 | 1.49563700  |
| H | 5.48440300  | 1.17486200  | 1.68065200  |
| C | -0.22358700 | -1.26241800 | -0.80224600 |
| C | -1.52142200 | -1.82783100 | -0.21177800 |
| O | -2.22186400 | -2.61297300 | -0.78021300 |
| O | -1.69066200 | -1.38294700 | 1.01920100  |
| C | -2.88948800 | -1.80511000 | 1.69665700  |
| H | -3.75032800 | -1.52854600 | 1.07103800  |
| H | -2.86926200 | -2.90047300 | 1.78688900  |
| N | -0.26575700 | -1.44807800 | -2.28380300 |
| N | -0.02054000 | -0.60312000 | -3.04535100 |
| H | 0.60460600  | -1.88464800 | -0.44427900 |
| C | -2.92176600 | -1.12348700 | 3.04005700  |
| H | -3.82722100 | -1.42745100 | 3.58223200  |
| H | -2.04510000 | -1.40331200 | 3.64046500  |
| H | -2.93689600 | -0.03093300 | 2.92136700  |

### TS3

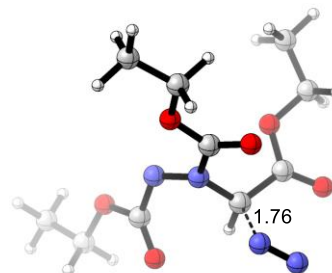

|   |             |             |             |
|---|-------------|-------------|-------------|
| N | 1.17053500  | 0.63169100  | -0.01456900 |
| N | 0.05059900  | 0.11748900  | -0.48005500 |
| C | -1.06714700 | 0.97474900  | -0.67725600 |
| C | 2.34646300  | -0.07682800 | -0.27762100 |
| O | 2.52045100  | -0.83879700 | -1.20020400 |
| O | -2.11855300 | 0.53198200  | -1.05608600 |
| O | -0.78709600 | 2.22476900  | -0.41268100 |
| C | -1.86851500 | 3.16342300  | -0.59058100 |
| H | -2.70395000 | 2.85156300  | 0.05219100  |
| H | -2.20129900 | 3.11134400  | -1.63672500 |
| C | -1.35008400 | 4.52976700  | -0.22587700 |
| H | -2.15423900 | 5.26725000  | -0.35061800 |
| H | -1.01455600 | 4.55260000  | 0.82005100  |
| H | -0.51123700 | 4.81469100  | -0.87566900 |
| C | 4.57401200  | -0.29411500 | 0.41795300  |
| H | 4.94568200  | -0.01592800 | -0.57912900 |
| H | 4.48057000  | -1.38947300 | 0.45008000  |
| O | 3.27037700  | 0.28279800  | 0.59593900  |



|   |             |             |             |
|---|-------------|-------------|-------------|
| C | 5.46217700  | 0.22915600  | 1.51772900  |
| H | 5.07096600  | -0.05719100 | 2.50384800  |
| H | 6.46968000  | -0.19367300 | 1.40643200  |
| H | 5.53664000  | 1.32442100  | 1.47017300  |
| C | -0.21216900 | -1.28613800 | -0.62951700 |
| C | -1.34486900 | -1.83280600 | 0.20279800  |
| O | -1.88794000 | -2.87319900 | -0.05210500 |
| O | -1.62577200 | -1.05315800 | 1.23479900  |
| C | -2.74309700 | -1.44298700 | 2.05244800  |
| H | -3.62626000 | -1.53883700 | 1.40428500  |
| H | -2.53003800 | -2.43034100 | 2.48669900  |
| N | -0.62407100 | -1.46269000 | -2.32923400 |
| N | -1.12440100 | -2.38750400 | -2.74493500 |
| H | 0.69034900  | -1.89566000 | -0.58684700 |
| C | -2.92841000 | -0.38529200 | 3.10994900  |
| H | -3.77751100 | -0.65451100 | 3.75248100  |
| H | -2.03007600 | -0.29927600 | 3.73686600  |
| H | -3.13525700 | 0.59137600  | 2.64999100  |

N<sub>2</sub>

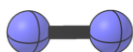

|   |            |            |             |
|---|------------|------------|-------------|
| N | 0.00000000 | 0.00000000 | 0.54652300  |
| N | 0.00000000 | 0.00000000 | -0.54652300 |

INT3-T

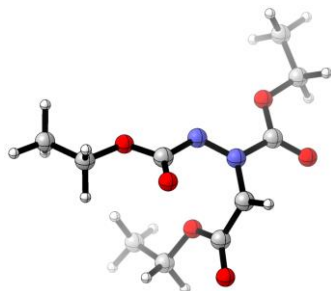

|   |             |             |             |
|---|-------------|-------------|-------------|
| N | -0.37038100 | 0.80679400  | -0.38627600 |
| N | -0.97909200 | -0.33812300 | -0.63450700 |
| C | -2.34677000 | -0.47377900 | -0.27882000 |
| C | 0.92980300  | 0.91147800  | -0.87837900 |
| O | 1.39905000  | 0.27811700  | -1.79843200 |
| O | -2.90530700 | -1.53140800 | -0.39378400 |
| O | -2.86330000 | 0.65070400  | 0.15054900  |
| C | -4.25387000 | 0.60119300  | 0.52939700  |
| H | -4.37029400 | -0.15354300 | 1.31997500  |
| H | -4.83853000 | 0.27737000  | -0.34329600 |
| C | -4.64767500 | 1.97813700  | 0.99667900  |
| H | -5.70534600 | 1.97198700  | 1.29233800  |
| H | -4.04465600 | 2.28270200  | 1.86311200  |
| H | -4.51427400 | 2.71541300  | 0.19305100  |

|   |             |             |             |
|---|-------------|-------------|-------------|
| C | 2.92104200  | 2.11724900  | -0.62295100 |
| H | 2.91684500  | 2.39789800  | -1.68638800 |
| H | 3.50121400  | 1.18784800  | -0.52250900 |
| O | 1.56944100  | 1.85947300  | -0.21306000 |
| C | 3.46582800  | 3.22001800  | 0.24855700  |
| H | 3.46289000  | 2.92170900  | 1.30622700  |
| H | 4.50011400  | 3.44191700  | -0.04694800 |
| H | 2.86775400  | 4.13514000  | 0.13757100  |
| C | -0.35819000 | -1.51441000 | -1.14727200 |
| C | 0.75230300  | -2.13409300 | -0.43304300 |
| O | 1.33633300  | -3.11411000 | -0.83163100 |
| O | 1.06322900  | -1.47056300 | 0.68336000  |
| C | 2.23087600  | -1.90840900 | 1.39150900  |
| H | 2.06791600  | -2.93907500 | 1.73926700  |
| H | 3.08004100  | -1.91874700 | 0.69191800  |
| H | -0.70098100 | -1.92114800 | -2.09693300 |
| C | 2.45410300  | -0.95158300 | 2.53532700  |
| H | 3.35334600  | -1.24465700 | 3.09361600  |
| H | 2.59278800  | 0.07212500  | 2.15917600  |
| H | 1.59721600  | -0.96013900 | 3.22327800  |

INT3-S

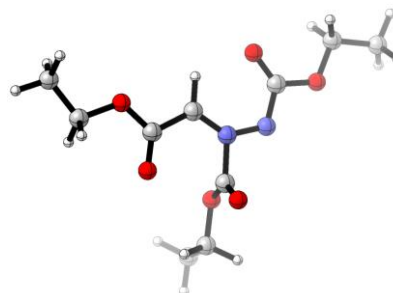

|   |             |             |             |
|---|-------------|-------------|-------------|
| N | -1.56463800 | 0.38970000  | 0.30711100  |
| N | -0.26740300 | 0.17180600  | 0.32694000  |
| C | 0.37115700  | 1.46449300  | 0.74377400  |
| C | -2.37823300 | -0.66586700 | -0.02631500 |
| O | -2.05795700 | -1.80520600 | -0.30682400 |
| O | 0.43188900  | 1.76724000  | 1.88725100  |
| O | 0.67590400  | 2.13211800  | -0.32656700 |
| C | 1.34915700  | 3.39581100  | -0.11045500 |
| H | 2.24400300  | 3.19256700  | 0.49445200  |
| H | 0.67495800  | 4.04631200  | 0.46384400  |
| C | 1.68864400  | 3.96833100  | -1.46048600 |
| H | 2.20676600  | 4.92700000  | -1.32461600 |
| H | 2.35033200  | 3.28872100  | -2.01474100 |
| H | 0.77894400  | 4.14397900  | -2.05076400 |
| C | -4.63572400 | -1.23728800 | -0.31974000 |
| H | -4.54573600 | -2.07862400 | 0.38381100  |
| H | -4.44051400 | -1.62811400 | -1.32978700 |
| O | -3.64802500 | -0.25476000 | -0.00056700 |
| C | -5.98912600 | -0.57664600 | -0.22925800 |

|   |             |             |             |
|---|-------------|-------------|-------------|
| H | -6.06289800 | 0.25850900  | -0.93991300 |
| H | -6.77424600 | -1.30698600 | -0.46756500 |
| H | -6.16707500 | -0.19240400 | 0.78495000  |
| C | 0.46968300  | -0.87896700 | 0.07959600  |
| C | 1.94282700  | -0.77300700 | 0.18873900  |
| O | 2.54324300  | 0.22230700  | 0.51943600  |
| O | 2.50941000  | -1.92278900 | -0.12639000 |
| C | 3.94644000  | -1.97259700 | -0.06408700 |
| H | 4.34926200  | -1.20569400 | -0.74135200 |
| H | 4.25771400  | -1.71803800 | 0.95937900  |
| H | -0.00766300 | -1.81060100 | -0.20438300 |
| C | 4.37641600  | -3.36174300 | -0.45954200 |
| H | 5.47190300  | -3.42926500 | -0.42042300 |
| H | 3.95632800  | -4.10977800 | 0.22695700  |
| H | 4.04907600  | -3.59452700 | -1.48228800 |

|   |             |             |             |
|---|-------------|-------------|-------------|
| O | -2.47752400 | 0.13085500  | -0.95952800 |
| O | -3.21954900 | -1.24056900 | 0.64903800  |
| C | -4.56944000 | -1.10454500 | 0.16446100  |
| H | -4.84545000 | -0.04115600 | 0.20799600  |
| H | -4.58994500 | -1.41844100 | -0.88905100 |
| H | -0.84568500 | -1.66501200 | 1.31760800  |
| C | -5.45851200 | -1.95839000 | 1.03078300  |
| H | -6.49646300 | -1.87302700 | 0.68222700  |
| H | -5.15799000 | -3.01382400 | 0.97605300  |
| H | -5.41440600 | -1.62950200 | 2.07823800  |
| C | 2.24126100  | -2.45235000 | -1.37975800 |
| H | 2.68157800  | -1.57156300 | -1.86485200 |
| H | 2.17588500  | -3.28248500 | -2.09461500 |
| H | 2.87894900  | -2.72430800 | -0.53052900 |
| C | 0.89465900  | -2.11946300 | -0.89585000 |
| N | -0.28186700 | -2.24229200 | -0.88573900 |

TS4

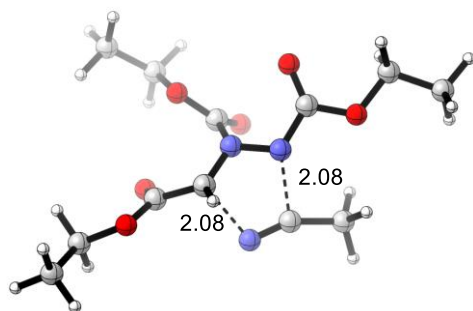

|   |             |             |             |
|---|-------------|-------------|-------------|
| N | 1.27267800  | -0.64809500 | 0.52901000  |
| N | 0.07426600  | -0.04945900 | 0.43086400  |
| C | -0.04322800 | 1.12713600  | -0.44505600 |
| C | 2.32471300  | 0.22556000  | 0.66071700  |
| O | 2.24631200  | 1.41738900  | 0.87822400  |
| O | 0.51946400  | 1.18420000  | -1.49246100 |
| O | -0.81376200 | 2.01141400  | 0.12410100  |
| C | -1.19756100 | 3.13299400  | -0.69657200 |
| H | -1.62460000 | 2.73460300  | -1.62800300 |
| H | -0.29062000 | 3.70300500  | -0.94281100 |
| C | -2.19425200 | 3.95033800  | 0.08240300  |
| H | -2.50208300 | 4.81695600  | -0.51777500 |
| H | -3.08615700 | 3.35219300  | 0.31575000  |
| H | -1.75301800 | 4.31447000  | 1.02042400  |
| C | 4.67058200  | 0.35324500  | 0.64193100  |
| H | 4.69875100  | 0.82517600  | 1.63528100  |
| H | 4.63738200  | 1.15697800  | -0.10823700 |
| O | 3.47942000  | -0.43248500 | 0.53555300  |
| C | 5.84785900  | -0.56492700 | 0.42584300  |
| H | 5.80465900  | -1.02537000 | -0.57145700 |
| H | 6.78218300  | 0.00733900  | 0.50407100  |
| H | 5.86375900  | -1.36243700 | 1.18198300  |
| C | -0.93524200 | -0.89324600 | 0.55517900  |
| C | -2.28869800 | -0.57820100 | -0.00585700 |

11a

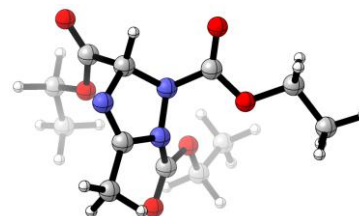

|   |             |             |             |
|---|-------------|-------------|-------------|
| C | -0.90101900 | 1.88909900  | -0.30683300 |
| C | -2.14526100 | 1.27318200  | -0.95589500 |
| O | -2.87596200 | 1.84618400  | -1.71565600 |
| O | -2.31258100 | 0.02982300  | -0.52722100 |
| C | -3.44675600 | -0.70343600 | -1.01405400 |
| H | -4.35998600 | -0.23687000 | -0.61583100 |
| H | -3.47331700 | -0.62341600 | -2.10995800 |
| H | -0.61280200 | 2.79017100  | -0.85914400 |
| C | -3.28941200 | -2.13065700 | -0.55306100 |
| H | -4.15452800 | -2.72409800 | -0.87822800 |
| H | -2.37989200 | -2.57455800 | -0.98195600 |
| H | -3.22421500 | -2.17926100 | 0.54341700  |
| C | -0.78010900 | 1.01701400  | 3.24553600  |
| H | -1.27434400 | 1.89512000  | 3.67525300  |
| H | 0.20512500  | 0.86455600  | 3.70438500  |
| H | -1.38148100 | 0.11988500  | 3.44363000  |
| C | -0.64711800 | 1.21690900  | 1.77909500  |
| N | -1.20995900 | 2.13460900  | 1.09767800  |
| N | 0.20809900  | 0.93835100  | -0.27804200 |
| N | 0.16469200  | 0.35850600  | 0.99066000  |
| C | 0.19246400  | -1.02993600 | 1.13495900  |
| C | 1.43996100  | 1.30299800  | -0.81277600 |
| O | 1.53780900  | 2.06823600  | -1.73856100 |
| O | -0.05972000 | -1.58383500 | 2.17420100  |
| O | 0.57220000  | -1.61992900 | 0.01825800  |

|   |             |             |             |
|---|-------------|-------------|-------------|
| C | 0.71856300  | -3.04801800 | 0.07670600  |
| H | -0.24195400 | -3.48937100 | 0.37846200  |
| H | 1.46186500  | -3.29117900 | 0.84968200  |
| C | 1.15239900  | -3.51629300 | -1.28886700 |
| H | 1.28128900  | -4.60694400 | -1.27874300 |
| H | 0.39899600  | -3.26078400 | -2.04711700 |
| H | 2.10867500  | -3.05433900 | -1.57190100 |
| C | 3.74474000  | 0.88293500  | -0.77760300 |
| H | 3.98851400  | 1.95225200  | -0.70076600 |
| H | 3.72106200  | 0.61538900  | -1.84380100 |
| O | 2.43737900  | 0.66768700  | -0.22275500 |
| C | 4.71379800  | 0.02664200  | -0.00291600 |
| H | 4.44864500  | -1.03635800 | -0.09119600 |
| H | 5.72783600  | 0.16757200  | -0.40056600 |
| H | 4.71420300  | 0.30400600  | 1.06040900  |

### 10a-T

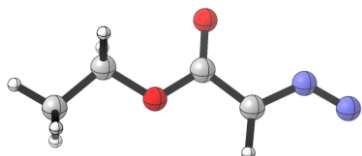

|   |             |             |             |
|---|-------------|-------------|-------------|
| C | 1.45981800  | 0.14671200  | 0.00000000  |
| C | 0.00000000  | 0.36509400  | 0.00000000  |
| O | -0.52398100 | 1.45031600  | 0.00000000  |
| O | -0.64790700 | -0.79304600 | 0.00000000  |
| C | -2.08231600 | -0.72279300 | 0.00000000  |
| H | -2.40457900 | -0.16010600 | 0.88854500  |
| H | -2.40457900 | -0.16010600 | -0.88854500 |
| N | 2.25782100  | 1.25835400  | 0.00000000  |
| N | 3.45534500  | 1.23304500  | 0.00000000  |
| H | 1.89751600  | -0.85500400 | 0.00000000  |
| C | -2.61612100 | -2.13259500 | 0.00000000  |
| H | -3.71419400 | -2.10834700 | 0.00000000  |
| H | -2.27975000 | -2.67644600 | -0.89365000 |
| H | -2.27975000 | -2.67644600 | 0.89365000  |

### TS5

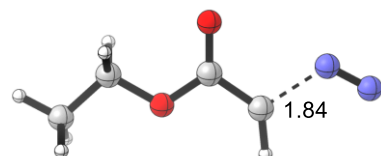

|   |             |             |             |
|---|-------------|-------------|-------------|
| C | 1.42842600  | -0.02196700 | 0.00000000  |
| C | 0.00000000  | 0.24745300  | 0.00000000  |
| O | -0.48875200 | 1.35353800  | 0.00000000  |
| O | -0.71118300 | -0.88320500 | 0.00000000  |
| C | -2.13852400 | -0.73770700 | 0.00000000  |
| H | -2.43453600 | -0.15972500 | 0.88814500  |
| H | -2.43453600 | -0.15972500 | -0.88814500 |

|   |             |             |             |
|---|-------------|-------------|-------------|
| N | 2.43596400  | 1.51861100  | 0.00000000  |
| N | 3.55493000  | 1.44046700  | 0.00000000  |
| H | 1.96543700  | -0.97151400 | 0.00000000  |
| C | -2.74390800 | -2.11878700 | 0.00000000  |
| H | -3.83957700 | -2.04060100 | 0.00000000  |
| H | -2.43476300 | -2.67929500 | -0.89330900 |
| H | -2.43476300 | -2.67929500 | 0.89330900  |

### INT4-T

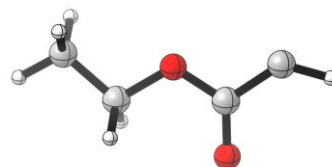

|   |             |             |             |
|---|-------------|-------------|-------------|
| C | 2.13802200  | -1.01949300 | 0.00014600  |
| C | 1.11716400  | 0.00182600  | -0.00067400 |
| O | 1.36662900  | 1.18870300  | 0.00040900  |
| O | -0.11886700 | -0.49819800 | -0.00042900 |
| C | -1.19083000 | 0.45321100  | -0.00001300 |
| H | -1.09513300 | 1.09598500  | 0.88795100  |
| H | -1.09560600 | 1.09621100  | -0.88786500 |
| H | 3.22490100  | -0.93779000 | 0.00098800  |
| C | -2.48959600 | -0.31366800 | 0.00023800  |
| H | -3.33358400 | 0.38930700  | 0.00055200  |
| H | -2.56585600 | -0.94939300 | -0.89301100 |
| H | -2.56537900 | -0.94962000 | 0.89336500  |

### INT4-S

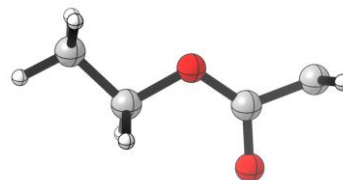

|   |             |             |             |
|---|-------------|-------------|-------------|
| C | -2.25758800 | -0.86466100 | -0.15015900 |
| C | -1.07776400 | -0.06605900 | -0.01124500 |
| O | -1.43692500 | 1.10102700  | -0.00417000 |
| O | 0.14502800  | -0.52212500 | -0.00220500 |
| C | 1.20381900  | 0.46510000  | 0.02239700  |
| H | 1.08300700  | 1.12260300  | -0.84978300 |
| H | 1.09081100  | 1.07150900  | 0.93187700  |
| H | -2.69770400 | -1.01944900 | 0.85234900  |
| C | 2.51571400  | -0.27467900 | -0.00340200 |
| H | 3.34142500  | 0.44924900  | 0.01753500  |
| H | 2.60815000  | -0.93449700 | 0.87030600  |
| H | 2.60439900  | -0.87883300 | -0.91682700 |

**TS6**

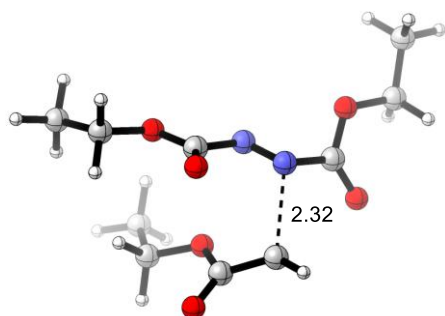

|   |             |             |             |
|---|-------------|-------------|-------------|
| C | 0.11004100  | 2.31665000  | -0.84628600 |
| C | -1.23188800 | 2.16959900  | -0.33738000 |
| O | -2.20515300 | 2.72878600  | -0.79418800 |
| O | -1.28222600 | 1.32217200  | 0.70125000  |
| C | -2.57134700 | 1.04368500  | 1.25950900  |
| H | -3.06472200 | 1.99392800  | 1.51070600  |
| H | -3.18792700 | 0.54308300  | 0.49492300  |
| H | 0.48223100  | 2.93210700  | -1.66319400 |
| C | -2.36028200 | 0.17720200  | 2.47659800  |
| H | -3.33028900 | -0.08313600 | 2.92185600  |
| H | -1.83625800 | -0.74878100 | 2.20122000  |
| H | -1.76341700 | 0.71100600  | 3.22958800  |
| N | 0.48802200  | -0.62943700 | -0.19461100 |
| N | 1.16683100  | 0.24938100  | -0.73362800 |
| C | 2.40859200  | 0.52991100  | -0.04951800 |
| C | -0.75911500 | -0.85180200 | -0.91632400 |
| O | -1.04492200 | -0.34494400 | -1.96213200 |
| O | 2.66814600  | 1.62280600  | 0.36032100  |
| O | 3.17536400  | -0.53260600 | -0.03527100 |
| C | 4.49037300  | -0.36748500 | 0.54013000  |
| H | 4.36816100  | -0.08022600 | 1.59398100  |
| H | 4.99341100  | 0.45607600  | 0.01409500  |
| C | 5.22366100  | -1.67420600 | 0.38796000  |
| H | 6.22859800  | -1.57749000 | 0.82030700  |
| H | 4.69454000  | -2.48167400 | 0.91241700  |
| H | 5.32445900  | -1.94329000 | -0.67247500 |
| C | -2.76189300 | -2.06026800 | -0.78790300 |
| H | -2.56652800 | -2.68306700 | -1.67336400 |
| H | -3.27511500 | -1.14748300 | -1.12177200 |
| O | -1.48973800 | -1.69038400 | -0.21981900 |
| C | -3.54412800 | -2.80118600 | 0.26512000  |
| H | -3.75003300 | -2.15298800 | 1.12848900  |
| H | -4.50257700 | -3.12837300 | -0.15986500 |
| H | -2.99435600 | -3.68855400 | 0.60803900  |

**TS7**

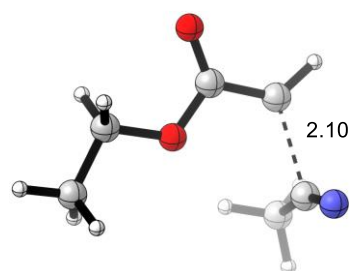

|   |             |             |             |
|---|-------------|-------------|-------------|
| C | 1.11363100  | 1.27439900  | -0.15893200 |
| C | -0.32967100 | 1.18838800  | -0.09496100 |
| O | -1.05533300 | 2.15956500  | -0.11037900 |
| O | -0.77679800 | -0.06848900 | -0.00721000 |
| C | -2.19780300 | -0.23792600 | 0.07747100  |
| H | -2.56478000 | 0.29877500  | 0.96492200  |
| H | -2.66299800 | 0.22199500  | -0.80701700 |
| H | 1.71501000  | 2.16808700  | -0.32645800 |
| C | -2.48330600 | -1.71654900 | 0.15815500  |
| H | -3.56711000 | -1.87893900 | 0.23258100  |
| H | -2.11523500 | -2.23472800 | -0.73865000 |
| H | -2.00348400 | -2.15747900 | 1.04310600  |
| C | 2.08845900  | -1.11308000 | -1.07193900 |
| H | 2.56283500  | -0.46223200 | -1.81750300 |
| H | 1.03381600  | -1.25527900 | -1.33803100 |
| H | 2.60443200  | -2.08145000 | -1.03707300 |
| C | 2.17485900  | -0.48528000 | 0.26325700  |
| N | 2.49393600  | -0.40100900 | 1.38950300  |

**INT5**

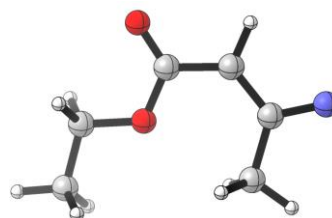

|   |             |             |             |
|---|-------------|-------------|-------------|
| C | 1.30917100  | 0.91574300  | -0.00022200 |
| C | -0.14996500 | 1.09075400  | 0.00007500  |
| O | -0.67053400 | 2.18273400  | -0.00006300 |
| O | -0.83786700 | -0.05027400 | 0.00051600  |
| C | -2.26738100 | 0.06150300  | 0.00050400  |
| H | -2.57628900 | 0.63158400  | 0.88910000  |
| H | -2.57617100 | 0.63328500  | -0.88701400 |
| H | 1.87731000  | 1.84663600  | -0.00064500 |
| C | -2.83958500 | -1.33383500 | -0.00082100 |
| H | -3.93675200 | -1.28142700 | -0.00071800 |
| H | -2.51817300 | -1.88641300 | -0.89494900 |
| H | -2.51811000 | -1.88814100 | 0.89221400  |
| C | 1.43224200  | -1.69110700 | 0.00053600  |
| H | 0.80108900  | -1.82426500 | -0.88678800 |
| H | 0.80104500  | -1.82351000 | 0.88791200  |

|   |            |             |             |
|---|------------|-------------|-------------|
| H | 2.23505500 | -2.43837000 | 0.00079200  |
| C | 2.04392400 | -0.30648000 | -0.00008600 |
| N | 3.32968200 | -0.20693200 | -0.00049100 |

### TS8

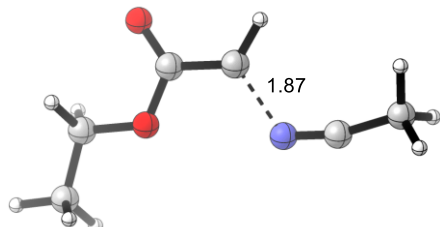

|   |             |             |             |
|---|-------------|-------------|-------------|
| C | -0.80326500 | 0.94777200  | -0.22111900 |
| C | 0.63281200  | 1.01241000  | -0.05088200 |
| O | 1.24314100  | 2.04443300  | 0.15078600  |
| O | 1.23027900  | -0.18235800 | -0.12617100 |
| C | 2.64727900  | -0.19453900 | 0.06094100  |
| H | 3.11545900  | 0.45448800  | -0.69477100 |
| H | 2.88239600  | 0.22933000  | 1.04914900  |
| H | -1.42787800 | 1.83776100  | -0.31724400 |
| C | 3.11793300  | -1.62299700 | -0.06059800 |
| H | 4.20632800  | -1.66922400 | 0.08087000  |
| H | 2.64025800  | -2.25540500 | 0.70095200  |
| H | 2.87815300  | -2.02796300 | -1.05387600 |
| C | -4.23054300 | -0.41119900 | -0.08720100 |
| H | -4.79675000 | -0.51396300 | 0.84785400  |
| H | -4.63921800 | -1.11757400 | -0.82173600 |
| H | -4.33794400 | 0.61619200  | -0.46897400 |
| C | -2.82483000 | -0.70986000 | 0.15365400  |
| N | -1.64921200 | -0.65425200 | 0.24458400  |

### INT6

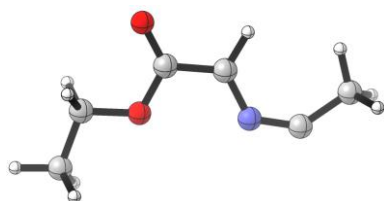

|   |             |             |             |
|---|-------------|-------------|-------------|
| C | -0.99748900 | 0.59835400  | 0.00003400  |
| C | 0.44274400  | 0.87597800  | -0.00004000 |
| O | 0.88603000  | 2.00395900  | 0.00020100  |
| O | 1.20466500  | -0.21719200 | -0.00035500 |
| C | 2.61948200  | -0.00107900 | -0.00037600 |
| H | 2.88976600  | 0.59029700  | -0.88818800 |
| H | 2.88962200  | 0.59157800  | 0.88660600  |
| H | -1.65597500 | 1.47445300  | 0.00043100  |
| C | 3.29411100  | -1.35028700 | 0.00064100  |
| H | 4.38470400  | -1.21879900 | 0.00033900  |
| H | 3.01262500  | -1.92503100 | 0.89414100  |
| H | 3.01232000  | -1.92652500 | -0.89180000 |

|   |             |             |             |
|---|-------------|-------------|-------------|
| C | -3.99070200 | -0.28663400 | 0.00044500  |
| H | -4.56698500 | -0.57363300 | 0.89266700  |
| H | -4.57891900 | -0.59020800 | -0.87824200 |
| H | -3.86182300 | 0.80813900  | -0.01041800 |
| C | -2.69222200 | -0.98837100 | -0.00074000 |
| N | -1.47234800 | -0.65888100 | -0.00058400 |

### INT7

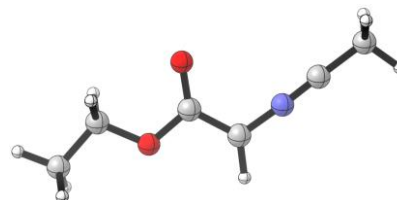

|   |             |             |             |
|---|-------------|-------------|-------------|
| C | -0.60743000 | -0.94775600 | 0.00010500  |
| C | 0.38439600  | 0.07825200  | 0.00016200  |
| O | 0.18537400  | 1.28284800  | 0.00006200  |
| O | 1.63861600  | -0.44013200 | 0.00036800  |
| C | 2.70458700  | 0.50123200  | 0.00011800  |
| H | 2.62303400  | 1.15120500  | -0.88519800 |
| H | 2.62367600  | 1.15095700  | 0.88568200  |
| H | -0.39533400 | -2.01298200 | 0.00011200  |
| C | 4.00384900  | -0.26909400 | -0.00042800 |
| H | 4.85431800  | 0.42662300  | -0.00059000 |
| H | 4.07686000  | -0.90771200 | 0.89152400  |
| H | 4.07628000  | -0.90743400 | -0.89262700 |
| C | -4.35421600 | 0.30260900  | -0.00017500 |
| H | -5.00359500 | -0.58432400 | 0.00045700  |
| H | -4.56089200 | 0.89494300  | -0.90158900 |
| H | -4.56055000 | 0.89585000  | 0.90071500  |
| C | -2.98009700 | -0.16154000 | -0.00011800 |
| N | -1.89032100 | -0.55301100 | 0.00001400  |

### TS9

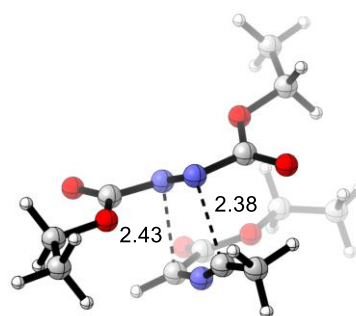

|   |             |             |             |
|---|-------------|-------------|-------------|
| C | -0.85050200 | -1.78367800 | -0.49918900 |
| C | 0.49862800  | -1.90470200 | -1.04083000 |
| O | 0.75648900  | -2.21676800 | -2.17954900 |
| O | 1.42323800  | -1.57834500 | -0.12254100 |
| C | 2.78980200  | -1.54287800 | -0.53765900 |
| H | 2.97479100  | -2.36382000 | -1.24374200 |
| H | 2.96457700  | -0.59396500 | -1.07151700 |

|   |             |             |             |   |             |             |             |
|---|-------------|-------------|-------------|---|-------------|-------------|-------------|
| H | -1.71535500 | -2.09538100 | -1.08261300 | C | -1.23413700 | -0.83728500 | -2.05609300 |
| C | 3.64673100  | -1.66410700 | 0.70041300  | C | -1.09410700 | -1.73143100 | -0.93026300 |
| H | 4.70730700  | -1.55042100 | 0.43654300  | O | -0.89930500 | -2.88175700 | -1.26878800 |
| H | 3.37964400  | -0.88997800 | 1.43398700  | O | -1.27722600 | -1.30086200 | 0.30280200  |
| H | 3.50613200  | -2.64819100 | 1.16966600  | C | -1.05288300 | -2.24523200 | 1.36995700  |
| C | -1.05410700 | -0.55978700 | 3.18667700  | H | -1.83454300 | -3.01675300 | 1.32544900  |
| H | -1.37679600 | -1.44095100 | 3.75741500  | H | -0.07952800 | -2.72881200 | 1.20497500  |
| H | -1.74593100 | 0.27916000  | 3.34007500  | H | -0.21855400 | -0.57520700 | -2.40127000 |
| H | -0.04972700 | -0.24166400 | 3.49514400  | C | -1.08682900 | -1.47162200 | 2.66363600  |
| C | -0.99296700 | -0.86770900 | 1.76932900  | H | -0.90239700 | -2.15427100 | 3.50416400  |
| N | -1.00218500 | -1.51288300 | 0.78954200  | H | -0.31138700 | -0.69210400 | 2.66590800  |
| N | -0.54403100 | 0.61606400  | -0.75667000 | H | -2.06691900 | -0.99588400 | 2.80915100  |
| N | -0.38646900 | 1.00372300  | 0.43450200  | N | 1.01853900  | 0.73533000  | 0.50538400  |
| C | 0.98619000  | 1.14300600  | 0.81307700  | N | 0.10316100  | 0.94915300  | -0.27758800 |
| C | -1.90541000 | 0.65243900  | -1.20906400 | C | -1.09239500 | 1.48205400  | 0.38669000  |
| O | -2.15982600 | 0.69910100  | -2.38193900 | C | 2.12658700  | 0.06126900  | -0.13638000 |
| O | 1.35678300  | 0.94923000  | 1.94242200  | O | 1.98710700  | -0.96740000 | -0.73302600 |
| O | 1.74209400  | 1.61939500  | -0.16020600 | O | -1.13969800 | 1.90291000  | 1.50094100  |
| C | 3.08298700  | 1.99912000  | 0.18954800  | O | -2.06687700 | 1.38396800  | -0.48283000 |
| H | 3.61997600  | 1.11538900  | 0.56181700  | C | -3.39414600 | 1.68595700  | -0.01137800 |
| H | 3.03351000  | 2.73275900  | 1.00769300  | H | -3.42124900 | 2.74608900  | 0.27875500  |
| C | 3.73353200  | 2.57190000  | -1.04409300 | H | -3.58157800 | 1.07757100  | 0.88557400  |
| H | 4.75974300  | 2.88284000  | -0.80599700 | C | -4.35855100 | 1.37106000  | -1.12467900 |
| H | 3.77464000  | 1.82353900  | -1.84823900 | H | -5.38111300 | 1.59740600  | -0.79424500 |
| H | 3.17786100  | 3.44818400  | -1.40577200 | H | -4.13706300 | 1.97572500  | -2.01494800 |
| C | -4.17880600 | 0.61304300  | -0.63692400 | H | -4.30358400 | 0.30730400  | -1.39432000 |
| H | -4.33978700 | -0.25264200 | -1.29676800 | C | 4.45051100  | 0.13694100  | -0.42371300 |
| H | -4.38794500 | 1.52296600  | -1.21809000 | H | 4.33532100  | 0.05610900  | -1.51369900 |
| O | -2.80146000 | 0.63149100  | -0.23552600 | H | 4.56358600  | -0.87552000 | -0.01158300 |
| C | -5.01948900 | 0.53459200  | 0.61223600  | O | 3.23479200  | 0.70460200  | 0.11643100  |
| H | -4.83629600 | 1.40385500  | 1.25923600  | C | 5.59013400  | 1.04179200  | -0.03660300 |
| H | -6.08356800 | 0.52057200  | 0.34040000  | H | 5.67770500  | 1.11343200  | 1.05616000  |
| H | -4.79205200 | -0.38084200 | 1.17672400  | H | 6.52756100  | 0.63159000  | -0.43534300 |
|   |             |             |             | H | 5.44638700  | 2.04923200  | -0.45057900 |

**TS10**

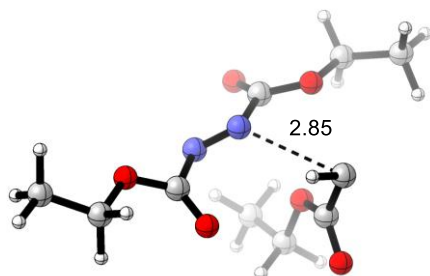

## 5. References

1. M. J. Frisch, et al., Gaussian 16, Revision B.01, Gaussian, Inc., Wallingford CT, **2016**.
2. Y. Zhao and D. G. Truhlar, *Theor. Chem. Acc.* 2008, **120**, 215.
3. S. Grimme, J. Antony, S. Ehrlich and H. Krieg, *J. Chem. Phys.* 2010, **132**, 154104.
4. F. Weigend and R. Ahlrichs, *Phys. Chem. Chem. Phys.* 2005, **7**, 3297.
5. A. V. Marenich, C. J. Cramer and D. G. Truhlar, *J. Phys. Chem. B* 2009, **113**, 6378.
6. (a) K. Fukui, *J. Phys. Chem.* 1970, **74**, 4161. (b) K. Fukui, *Acc. Chem. Res.* 1981, **14**, 363.
7. C. Y. Legault, CYLview20, Université de Sherbrooke, 2020 (<http://www.cylview.org>).
8. J. N. Harvey, M. Aschi, H. Schwarz and W. Koch, *Theor. Chem. Acc.* 1998, **99**, 95.
- 9 T. Lu, sobMECP program; <http://sobereva.com/286>.
